# Supplementary material for: Impact of VOCs on the formation of ozone in a central China city during severe pollution periods
Source: Copernicus journal article supplement (doi:10.5194/acp-2018-397), 2018-08-10
Supplement: Supplementary file 1 [file acp-2018-397-supplement.pdf]

## Supporting information

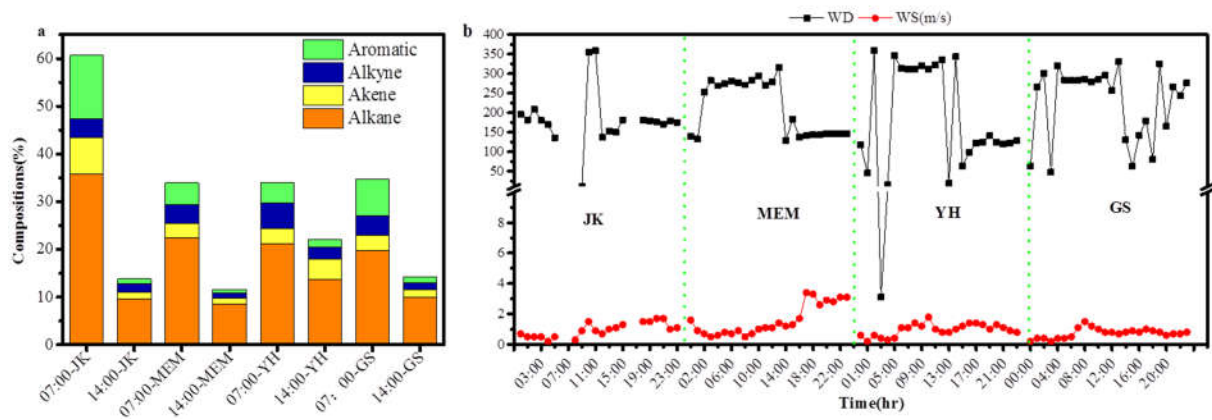

Fig.S1. Temporal variation of compositions, wind direction and wind speed on 10<sup>th</sup> August 2017
