# Supplementary material for: Impact of VOCs on the formation of ozone in a central China city during severe pollution periods
Source: Copernicus journal article supplement (doi:10.5194/acp-2018-397), 2018-08-10
Supplement: Supplementary file [file acp-2018-397-RC1-supplement.pdf]

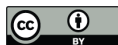

## 13 Abstract

14 In this work, a five-month sampling campaign was conducted for volatile organic compounds  
15 (VOCs) for the first time in Zhengzhou City, Henan province, China, where ozone (O<sub>3</sub>) pollution  
16 has shown an increasing trend in recent years. Fifty-seven VOCs defined by the Photochemical  
17 Assessment Monitoring Stations (PAMS) were sampled using canister method. Meanwhile, other  
18 O<sub>3</sub> precursor gases were monitored online at four different sites ~~between the time period of May~~  
19 ~~September, 2017~~. The results indicated that the average mixing ratio of Σ<sub>PAMS</sub> (31.57±23.35 ppbv)  
20 in Zhengzhou was lower than the other megacities in China, while alkyne was in a significantly  
21 higher proportion. The abundances, compositions and ratios of PAMS showed strong spatial and  
22 temporal variations. Alkenes were the largest contributors to the ozone formation potential (OFP).  
23 On clear days, higher O<sub>3</sub> levels were often accompanied with high Σ<sub>PAMS</sub>/NO<sub>x</sub> ratio at each site,  
24 demonstrating that the VOCs were more sensitive during the O<sub>3</sub> formation period in Zhengzhou.  
25 Furthermore, source apportionment was conducted with Positive Matrix Factorization (PMF)  
26 model, and it was found that the use of compressed natural gas (CNG), the evaporation of gasoline  
27 and the exhaust from vehicles were the important sources for ambient VOCs at all four sites.  
28 Besides, the meteorological conditions and long-range transport from other surrounding provinces  
29 also had an impact on the air quality determined using the cluster analysis. It is worth mentioning  
30 that the reduction in VOCs' emissions is necessary to suppress the O<sub>3</sub> pollution.

31

## 32 1. Introduction

33 Volatile organic compounds (VOCs) are diverse and reactive chemicals. Vehicle exhausts, fuel  
34 combustion and evaporation, and solvent usage are the known major anthropogenic sources of  
35 VOCs (Zhang et al., 2014; Yan et al., 2017; Wang et al., 2013a; Liu et al., 2017; Sahu et al., 2017).  
36 Since VOCs play a crucial role in the formation of ground-level ozone (O<sub>3</sub>) and secondary organic  
37 aerosol (SOA) (Yuan et al., 2013a; Han et al., 2018; Wang et al., 2018), studies on VOCs are being  
38 conducted globally (Wei et al., 2014; Malley et al., 2015; Ou et al., 2015; Zhu et al., 2017; Zhao et al.,  
39 2015). Fifty-seven VOCs, including C<sub>2</sub> - C<sub>10</sub> alkanes, alkenes, alkynes and aromatics, which greatly

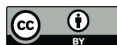

40 contribute to ambient O<sub>3</sub>, have been defined and regularly monitored by Photochemical Assessment  
41 Monitoring Stations (PAMS) (Shao et al., 2016; Chen et al., 2010). With the rapid economic  
42 development, O<sub>3</sub> pollution has troubled all urban cities (Wang et al., 2017c; Nagashima et al., 2017).  
43 Non-linearity relationships between the ambient VOCs, nitrogen oxide (NO<sub>x</sub>) and O<sub>3</sub> production  
44 indicate that the reduction in tropospheric O<sub>3</sub> is complex (Lin et al., 1998; Hidy and Blanchard,  
45 2015; Li et al., 2018). ~~During the time period of 1960–2010, the concentrations of VOCs and NO<sub>x</sub>~~  
46 ~~have decreased at the rate of 7.3% yr<sup>-1</sup> and 2.6% yr<sup>-1</sup>, respectively, due to which, the O<sub>3</sub> extrema~~  
47 ~~declined in southern California (Pollack et al., 2013). Evaluations on the production efficiency of~~  
48 ~~O<sub>3</sub> suggested the increase in responsiveness of O<sub>3</sub> to NO<sub>x</sub> in southeastern U.S. and therefore, the~~  
49 ~~changes in anthropogenic emissions of VOCs should be taken into consideration (Blanchard and~~  
50 ~~Hidy, 2017). Many modeling and field studies proved that photochemical production of O<sub>3</sub> in~~  
51 several regions in China, such as Guangzhou, Shanghai and Beijing, were sensitive to VOCs (Shao  
52 et al., 2009; Gao et al., 2017; Ou et al., 2016), and the sensitivity regime was always in flux  
53 (Luecken et al., 2018). It is predicted that the formation regime of O<sub>3</sub> will be more sensitive to  
54 VOC emissions in China by 2030 (Jin and Holloway, 2015). ~~On the other hand,~~ the International  
55 Agency for Research on Cancer (IARC, 2017) has identified several VOCs, such as benzene and  
56 1,3-butadiene as the first class carcinogens (Hoque et al., 2008; Iannuzzi et al., 2010).

57 In recent years, investigations involving the source apportionment of VOCs, acquirement of  
58 emission profiles and interpretation of the seasonal variations in China were mainly concentrated in  
59 Yangtze River Delta (YRD), Pearl River Delta (PRD) and Beijing-Tianjin region (BJT) (An et al.,  
60 2014; Wang et al., 2014; Chen et al., 2014; Liu et al., 2016a; Guo et al., 2017). With the nationwide  
61 deterioration of air quality, studies in less developed or developing regions, such as southwestern  
62 and northwestern China, are scarce. Contributions from the burning of biomass and high  
63 abundances of toxics and reactive compounds (such as, benzene) are prominent in these areas (Li et  
64 al., 2014; Li et al., 2017a). Consequently, differences on the structure and reactivity of VOCs, which  
65 render them different abilities to influence the production of ozone, and reactivity based on the air  
66 quality control measures, have developed (Capps et al., 2012). Additionally, U.S. Environmental  
67 Protection Agency (EPA) (2005) has encouraged states to take this approach while developing the

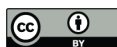

68 Ozone State Implementation Plans (OSIP). Aromatics and alkenes were responsible for most of the  
69 weighted reactivity of VOCs (59.4% and 25.8%, respectively) in PRD (Ou et al., 2015). With the  
70 changes in energy infrastructure, industrial construction and meteorological conditions (Wang et al.,  
71 2015; Shao et al., 2011), major emission sources of active compounds vary accordingly. For  
72 example, in less developed cities, such as Heilongjiang and Anhui, the combustion of biomass had  
73 the highest contribution to O<sub>3</sub> formation (40% and 36%, respectively), while in developed regions,  
74 such as Shanghai, Beijing and Zhejiang, the solvent use became more important with time (>20%)  
75 (Wu and Xie, 2017). Identifying the local chemical species play vital role in O<sub>3</sub> formation and  
76 provides useful information for policy-makers to make strategies to alleviate O<sub>3</sub> pollution.

77 Zhengzhou is an important developing city in the mid-west of Huanghe-Huaihe river flood  
78 plain in China. As the capital city of Henan province, it is densely populated with more than seven  
79 million residents in 2010 (Geng et al., 2013). With the rapid growth of industrial activities, vehicle  
80 emissions and fuel combustion, air quality in Zhengzhou has notoriously deteriorated. Zhengzhou is  
81 categorized as one of the most polluted cities due to the reason that on 65% of days in a year, its air  
82 quality exceeds the allowable limits set by Air Quality Guideline in 2013. The city has the third  
83 worst air quality among 74 nationwide cities in the first half year of 2015. Particularly, O<sub>3</sub> was the  
84 most critical pollutant in Zhengzhou in 65 - 85 days of summer (Shen et al., 2017; Gong et al.,  
85 2017). Over 50% of the days in a year, the mixing ratio of O<sub>3</sub> exceeded the Grade I standard of  
86 daily maximum average 8-hour (DMA8) (100 µg m<sup>-3</sup>) in Henan, while the estimated mortality of  
87 chronic obstructive pulmonary disease (COPD), caused by O<sub>3</sub>, was also higher compared to other  
88 provinces in China (Liu et al., 2018). As the major precursors of O<sub>3</sub>, the study on VOCs is of  
89 significance. However, for the city of Zhengzhou (China), the related research is non-existent in  
90 literature. In this work, a comprehensive sampling campaign aiming at VOCs has been conducted at  
91 four monitoring stations during the time period of May - September 2017. The spatial and temporal  
92 variations in VOCs in Zhengzhou were determined. The contributions of major emission sources  
93 were quantified, and the relationship between O<sub>3</sub>-VOCs-NO<sub>x</sub> was discussed in detail. The results  
94 and implications from this study can provide useful guidance for policy-makers to alleviate ozone  
95 pollution in Zhengzhou, China.



## 96 2. Experimental

### 97 2.1 Sampling site

98 According to the population density and industrial facilities, and in combination with the  
99 prevailing southeastern wind, four sites have been selected for the sampling campaign. These sites  
100 are Jingkai community (JK; 113.73°E, 34.72°N), municipal environmental monitoring station  
101 (MEM; 113.61°E, 34.75°N), Yinhang school (YH; 113.68°E, 34.80°N) and Gongshui company  
102 (GS; 113.57°E, 34.81°N), which are located at the southeastern, southwestern, northeastern and  
103 northwestern of urban Zhengzhou, respectively (Fig. 1). There was a main airport highway and  
104 heavy-traffic ring roads approximately 500 m west of JK. Furthermore, the site was at a distance of  
105 2 km from an industrial area, which involved packaging and printing plants, and material  
106 distribution factories. It is noteworthy that there were three coal-power plants in the urban area of  
107 Zhengzhou city. One of the power plants with the highest production was 1.6 km northwest of  
108 MEM. Both the MEM and YH included a mix of commercial and condensed residential areas,  
109 whereas the apartments around YH were more aged. In addition, GS was surrounded by several  
110 manufacturing plants, including pharmaceuticals, materials, foods and machineries.

111 Ten sampling days with the rainfall record (*ca.* 0 mm) were chosen in every month during the  
112 period of May - September, 2017. Pre-evacuated stainless-steel canisters (Entech Instrument, Inc.,  
113 Simi Valley, CA, USA), each having the volume of 3.2 L, were used to instantaneously collect  
114 VOCs. Two samples, one collected at 07:00 and the other at 14:00, were obtained on every  
115 sampling day. There were a total of 400 valid samples collected in this study. The chemical analysis  
116 was accomplished within two weeks after the collection of samples. Real-time data for trace gases,  
117 including SO<sub>2</sub>, CO, NO<sub>2</sub> and O<sub>3</sub>, and synchronous meteorological data, such as temperature (T),  
118 relative humidity (RH), wind direction (WD) and wind speed (WS), were recorded at each air  
119 monitoring station.

### 120 2.2 Chemical Analysis

121 In this study, the measurement of VOCs was based on Compendium Method TO-15, which  
122 was established by U.S. EPA. Air in the canister was concentrated using liquid-nitrogen at -160 °C



123 in a cryogenic pre-concentrator (7100A, Entech Instrument, Inc.). Both the CO<sub>2</sub> and H<sub>2</sub>O were  
124 removed from the transfer line. The air was then thermally desorbed at 120 °C and transferred for  
125 analysis in a gas chromatography (GC, 7890A, Agilent Technologies, Santa Clara, CA, USA)  
126 coupled with mass spectrometric detector (MSD) flame ionization detector (FID) (5977E, Agilent  
127 Technology). Dual columns ~~and detectors~~ were applied for the simultaneous analysis of C<sub>2</sub> - C<sub>11</sub>  
128 hydrocarbons. A PLOT column ~~with the length of~~ 15 m, internal diameter of 0.32 mm and film  
129 thickness of 3.0 μm was connected to the FID for detection of C<sub>2</sub> - C<sub>5</sub> NMHCs, whereas C<sub>5</sub> - C<sub>10</sub>  
130 NMHCs, oxygenated VOCs (OVOCs) and halocarbons were separated using a DB-624 (30 m ×  
131 0.25 mm inner diameter × 3.0 μm film thickness), which was connected to the MSD. The oven  
132 temperature of GC was programed to the initial temperature of 37 °C for 5 min, which was  
133 increased at the rate of 5 °C/min to 120 °C, and maintained at this temperature for 5 min. It was  
134 then ramped at the rate of 6 °C/min to the final temperature of 180 °C, where it was maintained for  
135 5 min. The total run time was 41.6 minutes. The MSD was operated with the electron ionization (EI)  
136 impact (70 eV), where the ions were detected in the selected ion monitoring (SIM) mode. Based on  
137 the retention time and mass spectra involving accurate standard, the targeted VOCs were identified,  
138 and then, quantified using multi-point calibration curve. Three standard gases for ~~TO-15 and~~ PAMS  
139 (1 ppm; Spectra Gases Inc, NJ, USA) were used. A total of 101 compounds, ~~including 28 alkanes,~~  
140 ~~11 alkenes, 17 aromatics, 34 halocarbons, 9 OVOCs, acetylene and CS<sub>2</sub> were quantified.~~ This study  
141 discussed only 57 PAMS due to their critical role in O<sub>3</sub> pollution. Detailed information on the  
142 PAMS involved in this study and their corresponding linearity of calibration (R<sup>2</sup>), measurement  
143 relative standard deviation (RSD), method detection limit (MDL), maximum increment reactivity  
144 (MIR, carter, 2010) are presented in Table 1.

### 145 2.3 Quality control and quality assurance (QC/QA)

146 ~~QC/QA was thoroughly executed to ensure the quality of research and obtain trustworthy~~  
147 ~~experimental data.~~ In order to alleviate contamination from previous samples, canisters had to be  
148 repeatedly cleaned using humidified zero air before sampling. In order to inspect the cleanliness  
149 and vacuum in canisters, the pre-cleaned canisters, after storing for 24h, were analyzed using  
150 GC-MS according to the same analytical procedures used to analyze the field samples. The



151 canisters without any contamination were used for sampling. No obvious emission source was  
152 present during the sampling events. Daily calibration was performed using 2 ppbv standard  
153 mixtures to ensure the consistency and sensitivity of GC-MSD/FID system. The deviation in  
154 standard values was within  $\pm 20\%$ . Abnormal QA/QC data with extremely high or low responses  
155 was recalibrated until the deviation was within the acceptable range.

#### 156 2.4 Positive matrix factorization (PMF)

157 U.S. EPA PMF 5.0 was used for source apportionment (Liu et al., 2008b; Lau et al.,  
158 2010; Abeleira et al., 2017; Xue et al., 2017). Paatero and Tapper (1994) and Paatero (1997)  
159 thoroughly illustrated the rationale of PMF. Briefly speaking, PMF is a diagnostic method  
160 involving multivariate analysis, and involves decomposing the integrate sample data into two  
161 matrices, namely the source profiles and the source contributions. The method takes advantage of  
162 other observation data, such as wind direction and speed. ~~The analyst could get messages on major~~  
163 ~~emission sources, which contribute to ambient VOCs.~~ Detailed information on the application of  
164 PMF can be referred to the publications cited above and to the PMF 5.0 user manual (U.S. EPA,  
165 2014).

166 Based on the chemical mass balance between the input concentrations and the chemical  
167 profiles, PMF regarded the ambient data  $x_{ij}$ , namely the concentration of  $j^{\text{th}}$  constituent in  $i^{\text{th}}$  sample,  
168 as the gross values contributed by  $p$  sources according to Eq. (1).

$$169 \quad X_{ij} = \sum_{k=1}^p g_{ik} f_{kj} + e_{ij} \quad (1)$$

170 where  $g_{ik}$  stands for the contribution of  $k^{\text{th}}$  factor in the  $i^{\text{th}}$  sample, while  $f_{kj}$  is the load of  $j^{\text{th}}$   
171 compound in the  $k^{\text{th}}$  source. Furthermore,  $e_{ij}$  is the relevant residual.

172 In order to avoid negative source contributions, penalty function was adopted for constraints.  
173 Each data point can be individually weighed in the model, while the samples with lots of missing  
174 values were excluded.



175 Based on the algorithm on uncertainties (U), expressed as  $Q$  values, the stability of running  
176 results was assessed according to Eq. (2).

$$177 \quad Q = \sum_{i=1}^n \sum_{j=1}^m \left[ \frac{x_{ij} - \sum_{k=1}^p g_{ik} f_{kj}}{u_{ij}} \right]^2 \quad (2)$$

178 where  $u_{ij}$  stands for the uncertainty of the  $j^{\text{th}}$  compound in  $i^{\text{th}}$  sample.

179 In the PMF model, uncertainty is a function to evaluate the deviations in sampling and analysis  
180 procedure (Paatero, 2007). The uncertainty (U) can be calculated based on Eq. (3) (Polissar et al.,  
181 1998).

$$182 \quad U = \begin{cases} \sqrt{(EF \times \text{concentration})^2 + (MDL)^2} & (\text{conc.} > \text{MDL}) \\ \frac{5}{6} MDL & (\text{conc.} \leq \text{MDL}) \end{cases} \quad (3)$$

184 where  $EF$  signifies the error fraction that equals 100 times of the percentage uncertainty.

### 185 3 Results and discussion

#### 186 3.1 Mixing ratios and meteorological variations

187 The total concentrations of PAMS ( $\Sigma_{\text{PAMS}}$ ) were different for all four sites (Table 2), and the  
188 ranks were inconsistent between each sampling month. In May 2017, the highest  $\Sigma_{\text{PAMS}}$  was  
189 reported at JK ( $37.65 \pm 22.58$  ppbv), followed by GS ( $31.73 \pm 18.70$  ppbv), YH ( $30.05 \pm 16.43$   
190 ppbv) and MEM ( $29.05 \pm 15.34$  ppbv), while the  $\Sigma_{\text{PAMS}}$  values for the month of June, July, August  
191 and September were found to be in the order of: GS>JK>MEM>YH, MEM>GS>JK>YH,  
192 YH>MEM>JK>GS, and MEM> YH > GS >JK, respectively. Beside the emission sources (to be  
193 discussed in Section 3.2), the meteorological conditions also contributed to the variations. For  
194 instance, the prevailing wind in May was northwestern at MEM, GS and YH, while the  
195 southwestern wind was dominant at JK. The transportation of air pollutants from urban center and  
196 industrial plants meant that the highest level of  $\Sigma_{\text{PAMS}}$  was seen at JK. In June 2017, the prevailing  
197 wind vector changed to southeastern at MEM and GS. The average wind speed at GS ( $0.74 \pm 0.33$   
198  $\text{m s}^{-1}$ ) was significantly lower than that at MEM ( $1.84 \pm 0.94 \text{ m s}^{-1}$ ), indicating poor dispersion





199 conditions at GS. Furthermore, the air pollutants emitted from MEM were more accumulated at GS,  
200 which was due to higher  $\Sigma_{\text{PAMS}}$  at GS ( $39.29 \pm 25.37$  ppbv) than that at MEM ( $30.28 \pm 12.77$  ppbv).  
201 It should also be noted that, when  $\Sigma_{\text{PAMS}}$  at JK was higher than that of GS, the levels at YH were  
202 higher than those of MEM, and vice versa. ~~Based on their geographic locations, both the GS and~~  
203 ~~MEM were located in the western part of Zhengzhou city, while JK and YH were situated in the~~  
204 ~~eastern side of the city.~~ Except for the discriminations between the pollution sources at every site,  
205 the above phenomenon might be a **result of topographical effect**.

206  $\text{C}_2$  -  $\text{C}_5$  alkanes, acetylene, ethylene, toluene and benzene were the most abundant PAMS  
207 detected at all sites (Table 3). These chemicals ~~had the contribution of~~  $>60\%$  for  $\Sigma_{\text{PAMS}}$ ,  
208 representing the general consistency of pollution sources in the region. The mixing ratios of toluene  
209 varied within a wide range at each site. Toluene is an important aromatic and has a variety of  
210 emission sources (Wang et al., 2014; Barletta et al., 2005), among which, ~~the vehicle exhaust and~~  
211 solvent usage are the major contributors. Due to variable origins and emission strengths, few  
212 compounds exhibited wide ranges in certain months. The mixing ratios of cyclohexane, isopentane,  
213 toluene, and isobutane had large deviations at MEM in June, which were attributed to the increase  
214 in **liquefied petroleum gas (LPG) and gasoline evaporation** due to **the increase in ambient**  
215 **temperatures** (Li et al., 2017a; Liu et al., 2008a). At YH and GS, the largest deviations were seen in  
216 the month of September. **The mixing ratios of fossil fuel combustion markers, such as acetylene**  
217 **( $5.08 \pm 8.36$  ppbv), toluene ( $4.37 \pm 5.28$  ppbv), and m,p-xylene ( $1.09 \pm 1.62$  ppbv) were varied**  
218 **significantly at YH (Zheng et al., 2017). The variations in propane ( $10.77 \pm 17.73$  ppbv), n-butane**  
219 **( $7.55 \pm 13.79$  ppbv), isobutane ( $5.46 \pm 10.76$  ppbv) and isopentane ( $5.25 \pm 8.76$  ppbv) at GS were**  
220 **reasonably significant due to the evaporation of gasoline and the use of LPG (Li et al., 2017a; Liu et**  
221 **al., 2008a). Both cases demonstrate the widespread combustion sources and fuel evaporation in**  
222 **Zhengzhou city.**

223 **Among these** organic classes, **alkane was the most abundant** (Fig.2), and accounted for  
224 52.85%, 62.52%, 53.38%, 53.39% of the total  $\Sigma_{\text{PAMS}}$  values at JK, MEM, GS, and YH, respectively.  
225 The highest composition of alkane was observed at MEM due to the stronger contributions of  
226 **ethane, iso-pentane and other branched alkanes** (such as, the ones having carbon number of 7 - 8).

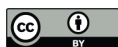

227 Wang et al. (2017b) reported that **these compounds** could originate from the cooking process,  
228 which is consistent with the results reported here, as there was a shopping mall with a number of  
229 canteens around 200 m northeast to the sampling station. In addition, many restaurants were also  
230 scattered around.

231 **In comparison**, the aromatic compounds showed lower compositions in the afternoons (for  
232 example, around 14:00 LT) than the mornings (for example, around 07:00 LT) (Fig. 2). **Increases in**  
233 **alkene compositions were mainly ascribed to higher contributions of isoprene, which was emitted**  
234 **from biogenic sources at higher temperature and solar irradiation.** Isoprene's contribution to  $\Sigma_{\text{PAMS}}$   
235 value at JK at was 12% at 14:00 LT (Fig.2), which was much higher than the other three sites.  
236 These results are in accordance with its larger **vegetation coverage in the surrounding areas.**

237 **The average  $\Sigma_{\text{PAMS}}$  values in Zhengzhou city was significantly lower than those in Beijing**  
238 **(65.55 ppbv), Hangzhou (55.9 ppbv), Guangzhou (47.3 ppbv) and Nanjing (43.5 ppbv), though they**  
239 **were higher than that in Wuhan ( $23.3 \pm 0.5$  ppbv) (Guo et al., 2012; Li and Wang, 2012; An et al.,**  
240 **2014; Lyu et al., 2016; Raysoni et al., 2017).** Furthermore, population density, industrial activity,  
241 **fuel composition, local stringent regulations for environmental protection, terrain, and weather**  
242 **contributed to their abundances.** Alkanes were generally the largest contributor in most areas (Fig.  
243 2), while the compositions of aromatics were relatively lower in Zhengzhou city. It is **well known**  
244 **that aromatics mainly originate from solvent usage and vehicle exhaust.** It is also worth mentioning  
245 that Zhengzhou has less manufacturer involved in shoemaking and shipbuilding than Guangzhou  
246 and Nanjing. The registered number of vehicles was also lower than that in Beijing. On the other  
247 hand, higher composition of alkyne was observed in Zhengzhou. Alkyne typically originates from  
248 combustion sources. Henan is the largest agricultural province in China. As the sampling duration  
249 covered the crop harvest in June, the residents often used crop residues as the biofuel for their  
250 subsistence, thus resulting in **higher alkyne compositions.**

### 251 3.2 **Temporal variations**

252 The time series of mixing ratios of CO, SO<sub>2</sub>, NO, NO<sub>2</sub>, O<sub>3</sub> and PAMS at every site are **shown**  
253 **in Fig. 3. Both the *T* and *RH* are also included in Fig. 3.** The results showed that there is a



254 distinctive temporal characteristic, during which, lower levels of **all air pollutants** were observed in  
255 July and August (mid-summer) than in other months. These results were similar to those obtained  
256 for other urban areas (Li and Wang, 2012; Cheng et al., 1997; Na et al., 2001). Changes in boundary  
257 layer depth, human activities, and abundance of hydroxyl radicals ( $\bullet\text{OH}$ ) were the potential causes  
258 for the phenomenon. Pal et al. (2012) reported that the height of atmospheric boundary layer was  
259 positively correlated with temperature. ~~In the current study, the highest ambient temperature was~~  
260 ~~observed in July, while~~ the occurrence of **precipitation** was more frequent in most areas of China  
261 during this period. ~~Furthermore, stronger dispersion efficiently offered a wash-out effect for~~  
262 ~~diluting the~~ air pollutants ~~to lower levels in~~ ambient air. Additionally, a series of effective local  
263 policies, such as prohibition of painting and coating in open air and limitations on fuel supply  
264 between 10:00 -17:00 LT during hot summer days assisted in suppressing the **VOCs<sup>2</sup>** emissions.  
265 Meanwhile, many organizations, such as schools, institutes and scattered private workshops, were  
266 closed due to summer vacations. Some large-scale industries also stopped manufacturing processes  
267 for two weeks during this period. Due to this, the anthropogenic emissions reduced, which in turn  
268 resulted in a decrease in VOCs,  $\text{SO}_2$ , and  $\text{NO}_x$  emissions. The reduction of precursor levels and  
269 unfavorable photochemical conditions (such as, higher RH and **WS**) resulted in the  $\text{O}_3$  levels to be  
270 constantly below the standard.

271 As demonstrated in **Fig. 3, the observed  $\Sigma_{\text{PAMS}}$  values at 07:00 LT were** often higher than those  
272 at 14:00 LT. The accumulation of pollutants during night-time and the temperature inversion in the  
273 morning were the most reasonable explanations for this phenomenon. Stronger photochemical  
274 reaction during noon-time led to the reduction in atmospheric VOCs. It should be noted that  
275 **pronounced  $\Sigma_{\text{PAMS}}$  were** occasionally observed at MEM and GS, which were potentially ascribed to  
276 sharp changes in local emissions and meteorological conditions. At MEM, the distinctive increment  
277 was always **accompanied by obvious uplift of alkanes or aromatics.** Combined with the changes in  
278 other parameters, such as levels of  $\text{NO}$ ,  $\text{NO}_2$ ,  $\text{SO}_2$ ,  $\text{CO}$ , RH and T, it was concluded that the  
279 abnormally high  $\Sigma_{\text{PAMS}}$  values at MEM were mainly **caused by enhanced combustion sources.** Due  
280 **to the disturbance from solvent use for building renovation,** extremely high levels of aromatics  
281 were observed at GS in June. In addition, there were potential impacts from gas-fueled power



282 plants, which were located about 1 km northwest of the site. Compressed natural gas (CNG) or  
283 LPG consumptions resulted in an increase in mixing ratio of propane, isobutane and n-butane  
284 (Huang et al., 2015b), which was found consistent with the observations at this site.

285 ~~Acetylene is a stable chemical compound that mainly originates from the combustion of~~  
286 ~~biomass/fossil fuel.~~ On the morning of 5<sup>th</sup> September (highlighted in pink in Fig. 3), alkyne was  
287 found in extremely high concentrations (14.65 - 39.42 ppbv). Its mixing ratio in most of the urban  
288 areas was <10 ppbv (Louie et al., 2013; Duan et al., 2008; Guo et al., 2012). It was learnt that the 5<sup>th</sup>  
289 September is a festival day for the people, who worship their ancestors. A large number of incenses  
290 and offerings, made up of wood and paper, were burnt during the festival, resulting in an increase in  
291 the mixing ratio of acetylene all over the Zhengzhou city.

### 292 3.3 Spatial variations

293 Average  $\Sigma_{\text{PAMS}}$  were higher at industrially impacted sites of GS (31.66±28.73 ppbv) and JK  
294 (28.63±22.04 ppbv) than those at ~~the other two sites~~ (MEM and YH). Additionally, the air  
295 pollutants related to the combustion process, such as SO<sub>2</sub> and CO were also in abundance in  
296 western area of Zhengzhou (GS and MEM), where stronger emission sources were related to the  
297 combustion of biomass or fossil fuel. Meanwhile, the O<sub>3</sub> levels did not present the same trend with  
298  $\Sigma_{\text{PAMS}}$  among the four sites, indicating that the transformation between O<sub>3</sub>-NO<sub>x</sub>-VOCs was more  
299 complex than the linear reactions.

300 In June, the O<sub>3</sub> concentration often exceeded the national standard level of 80 ppbv. The  
301 average mixing ratio of O<sub>3</sub> during daytime (07:00-18:00 LT) at JK, MEM, YH, and GS were 74.87  
302 ±39.55 ppbv, 73.50 ±40.59 ppbv, 73.81 ±35.69 ppbv, and 87.99 ±46.11 ppbv, respectively. The  
303 order of these values is consistent with that of the  $\Sigma_{\text{PAMS}}$ , in which the higher levels were observed  
304 at JK and GS. Combined with the higher solvent usages, highest aromatics levels and the severer O<sub>3</sub>  
305 pollutions were found at GS as expected. Even though both the  $\Sigma_{\text{PAMS}}$  and higher O<sub>3</sub> formation  
306 potential compounds (such as, alkenes and aromatics) at MEM were a bit higher than those at YH,  
307 a reverse order of O<sub>3</sub> concentration was observed. Such phenomenon could be attributed to other  
308 critical precursors, such as NO<sub>x</sub>, which are involved in the formation of O<sub>3</sub>. NO at MEM (8.48 ±



309 25.74 ppbv) was significantly higher than that at YH ( $2.57 \pm 3.08$  ppbv) during daytime, indicating  
310 that the reaction between  $O_3$  and NO was more efficient at MEM.

311 It is well known that  $O_3$  pollution is a regional problem. Streets et al. (2007) reported that the  
312 contribution of air pollutants, derived from Hebei, was around 35 - 60% to the pollution in Beijing,  
313 which experienced  $O_3$  episodes. Along with the decrease in ambient temperature and light intensity,  
314 and an increase in RH, the number of non-attainment  $O_3$  days theoretically reduced after June, 2017,  
315 while the maximum was observed on August 10<sup>th</sup>, 2017 (highlighted in yellow in Fig. 3). VOCs are  
316 the critical contributors to the formation of  $O_3$ . The reductions in  $\Sigma_{PAMS}$  in the afternoons (around  
317 14:00 LT) compared to mornings (around 07:00 LT) may have originated from the uptake by  $O_3$   
318 formation (Fig. 4). Furthermore, the highest VOCs concentration was observed at YH, which was  
319 due to its downwind position to the other three sites between 08:00 - 15:00 LT on August 10<sup>th</sup> (Fig.  
320 4). Additionally, the transmission of pollutants led to an abnormally high  $O_3$  level at YH.

321 Overall, when the synoptic conditions, such as  $T$ ,  $RH$  and  $WS$  were favorable, the  $O_3$  level was  
322 accompanied by the increase in VOCs concentrations, which potentially demonstrated that the  $O_3$   
323 formation was more sensitive to the abundance of VOCs in Zhengzhou city.

### 324 3.4 Ratios of specific compounds

325 Ratios of specific VOCs are useful indicators to identify the emission sources (Raysoni et al.,  
326 2017; Liu et al., 2015; Li et al., 2017c; Huang et al., 2017; Ho et al., 2009). In order to characterize  
327 the differences in the contribution of various sources at each site, two ratios of toluene/benzene and  
328 i-pentane/n-pentane were discussed. The ratio of toluene to benzene (T/B) is an efficient tool to  
329 differentiate between pollution sources, such as vehicle exhaust, coal combustion and solvent use  
330 (Sun et al., 2018). As shown in Fig. 5, the T/B ratio showed variation during days and months. In  
331 addition, the correlations between toluene and benzene were different throughout the sampling  
332 period, indicating that their emission sources were always changing. The atmospheric lifetimes for  
333 toluene and benzene are 1.9 days and 9.4 days, respectively, while the abundance of  $\bullet OH$  was  
334 assumed to be  $10^6$  rad  $cm^{-3}$  (Monod et al., 2001). Therefore, toluene was consumed more rapidly  
335 than benzene during the photochemical reaction. Due to this reason, the T/B ratios at 14:00 LT



336 were almost lower than those at 07:00 LT. However, in September, higher T/B ratios at 14:00 LT  
337 were observed more frequently at MEM and YH than the other station. Meanwhile, the values were  
338 increased regionally, which was in accordance with the weaker photochemical reactions in late  
339 summer.

340 The  $R^2$  value for the correlation between benzene and toluene was better in May (0.73 - 0.84)  
341 than during other months for all sites, and the average ratio in this month varied within the range of  
342 1.81 - 3.36 for all four sites. Both the tunnel studies and roadside researches indicated that T/B ratio  
343 varied within the range of 1 - 2 when the atmosphere was heavily impacted by vehicle emissions  
344 (Gentner et al., 2013; Tang et al., 2007; Huang et al., 2015b; Wang et al., 2002). When the ratio was  
345 less than 0.6, it may be due to other sources, such as coal combustion and biomass burning (Tsai et  
346 al., 2003; Akagi et al., 2011). The industrial activity becomes more important when the value of T/B  
347 ratio is higher than 3 (Zhang et al., 2015). The results suggest that evident impacts were observed  
348 from vehicle emissions on the T/B ratio during the sampling period. Except for September, the  
349 average T/B ratio at JK lied within the range of 1.47 - 2.72, which was due to the vehicle emissions.  
350 Due to less interruption from photochemical reaction, the impact from industrial activities, which  
351 were mainly related to industrial clusters composed of automotive-related workshops and printing  
352 shops, and located approximately 2 km southwest of the observation site became important and  
353 resulted in higher T/B value (3.89) in September at JK. It is apparent that the T/B ratio at MEM was  
354 on the low side during the period of May - August (0.96 - 1.68), highlighting the impact of  
355 coal-fired thermal power plant. After excluding the abnormal values, the average ratio at GS (0.44 -  
356 1.17) exhibited clear characteristics related to the combustion of coal/biomass during the period of  
357 June - August. This was related to the fact that the region was located on the edge of Zhengzhou.  
358 The impacts from biomass burning would be heavier than in other areas during the harvesting  
359 season. On the other hand, the coal fired power plant next to SZ was located at the southeast of GS  
360 with the linear distance of 5 km between the two points. Considering that the prevalent wind  
361 direction was southeastern during the period of June - August, the air pollutants emitted from the  
362 power plant could be easily transported to this region. Overall, the emission sources related to  
363 industrial activities were more evident in September. It is likely that the traffic emissions at JK and



364 combustion sources related to coal or biomass at MEM and GS would account for more  
365 contributions to VOCs, while there were no consistent results observed for YH due to the wide span  
366 of T/B ratio (1.07 - 5.38).

367 **i-Pentane has similar reactivity to n-pentane** (Jobson et al., 1998). The ratio between these two  
368 VOCs is useful in differentiating the potential sources, such as natural gas drilling and vehicle  
369 emissions. In this study, i-pentane and n-pentane were highly correlated ( $R^2=0.78 - 0.89$ )  
370 throughout the whole sampling campaign (Fig. 6), indicating stable sources for these two  
371 compounds. In the area, heavily impacted by natural gas drilling, the ratios lied within the range of  
372 0.82 - 0.89 (Gilman et al., 2013;Abeleira et al., 2017). **Higher values were often reported for**  
373 **automobiles, such as 2.2 - 3.8 for vehicle emissions, 1.8 - 4.6 for fuel evaporation, and 1.5 - 3.0 for**  
374 **gasoline (Russo et al., 2010;McGaughey et al., 2004;Jobson et al., 2004;Wang et al., 2013b). Low**  
375 **values within the range of 0.56 - 0.80 were found for coal combustion.** The highest ratio was  
376 observed at JK (2.73), which was comparable to the value of 2.93 reported in a Pearl River Tunnel  
377 (Liu et al., 2008a), thus indicating strong impacts from traffic-related sources. The average ratio at  
378 MEM (2.02) was inconsistent with the characteristics of coal combustion. Yan et al. (2017)  
379 reported that the ratio for areas, which include several coal-fired thermal power plants, was  
380 approximately 0.55. The variation could be explained by factors, such as production scales, fuel  
381 compositions, sampling time and terrain. Additionally, it is remarkable that MEM was surrounded  
382 by a main road with four traffic lanes. The distance between the nearest traffic light and the  
383 sampling site was just 200 m. Frequent idling may cover up the contribution from coal combustion,  
384 thus overshadowing the effect of traffic emissions. The average ratio at GS (1.85) was close to that  
385 at YH (1.68). This was due to the similarity between the traffic related sources (such as, gasoline  
386 and fuel evaporation). The results showed that the vehicle emissions were an important source for  
387 VOCs in Zhengzhou city.

### 388 **3.5 Reactive chemicals**

389 Due to large differences in the reactivity of individual species, the contribution of each  
390 component to O<sub>3</sub> formation was different. Ozone formation potential (OFP) is a useful tool to



391 identify local active species that contribute the most to O<sub>3</sub> pollution (Huang et al., 2017). OFP is  
392 calculated using Eq. (4).

$$393 \quad \text{OFP} = C_i \times \text{MIR} \quad (4)$$

394 where  $C_i$  represents the concentration level of  $i^{\text{th}}$  species, while  $\text{MIR}$  is a constant taken from Carter  
395 (2010) (Table 1).

396 Different from the results reported by (Wu and Xie, 2017), based on the emission inventory for  
397 North China Plain (NCP), YRD and PRD, where the largest contributor was the aromatics,  
398 followed by alkenes, alkenes were the most significant contributors ( $55.91 \pm 14.17\%$ ) to the sum of  
399 OFP in Zhengzhou city. The biggest contributors included ethylene, isoprene, m,p-xylene, toluene,  
400 propylene, acetylene, n-butane, i-pentane and propane, and their contributions lied within the range  
401 of 74.64 - 79.90% of the sum of OFP (Table 5). The composition of acetylene was higher compared  
402 to other areas (Li and Wang, 2012; Jia et al., 2016), demonstrating that it is necessary to conduct  
403 emission controls on sources related to combustion in Zhengzhou city.

404 It is well known that the ratio between VOCs and NO<sub>x</sub> is an important index to analyze  
405 variable O<sub>3</sub> concentrations (Toro et al., 2006; Simon et al., 2015; Geng et al., 2009; Jin and Holloway,  
406 2015; Geddes et al., 2009; Li et al., 2017b). Zhengzhou suffered from the severest O<sub>3</sub> pollution in  
407 June, 2017. The relationships between OFP of each organic group,  $\Sigma_{\text{PAMS}}$ , and the concentrations of  
408 NO<sub>x</sub> and O<sub>3</sub>, as well as the corresponding meteorological conditions, are shown in Fig. 7. At every  
409 site at 07:00 LT, WS was generally lower than that at 14:00 LT, indicating weaker vertical  
410 distribution. With the lower RH and higher T and OFP ( $88.13 \pm 30.32$  ppbv) values, lower O<sub>3</sub> was  
411 unexpectedly seen at YH than MEM on sunny days, which was attributed to lower  $\Sigma_{\text{PAMS}}/\text{NO}_x$   
412 ratios at YH (highlighted in pink in Fig. 6). The total OFP was higher at JK than at other sites,  
413 although the actual O<sub>3</sub> levels at JK were very close to those at MEM and even lower than those at  
414 GS. A lower WS at GS ( $0.65 \pm 0.26$  m s<sup>-1</sup>) promoted the pollutant accumulation. The ratio of  
415  $\Sigma_{\text{PAMS}}/\text{NO}_x$  was more scattered at JK and MEM than at YH and GS along with the variable WS,  
416 thus demonstrating significant impacts from meteorological conditions. During clear days, higher O<sub>3</sub>





417 concentration was always accompanied by higher  $\Sigma_{\text{PAMS}}/\text{NO}_x$  ratio at each site, indicating a close

418 relationship between the  $\Sigma_{\text{PAMS}}/\text{NO}_x$  ratio and  $\text{O}_3$ .

### 419 3.6 Source apportionment

420 In order to select appropriate chemical species for PMF model, following principles were used.

421 Species with mixing ratios usually below MDL were eliminated. Except for the source markers,

422 species with high reactivity should be excluded (Shao et al., 2016; Guo et al., 2011). Finally, 28

423 VOC species and  $\text{NO}_2$  were chosen for the source analysis.  $Q(\text{robust})$ ,  $Q(\text{true})$  and  $Q(\text{true})/Q(\text{exp})$

424 are presented in Table 6. Based on the model results, seven factors were defined at MEM, YH, and

425 GS, while eight factors were defined at JK (Fig.8).

426 Source profiles showed that the sites had similar regional characteristic. There was a strong

427 common source (factor 1) for  $\text{C}_2$  -  $\text{C}_5$  n-alkanes and certain amounts of  $\text{C}_2$  -  $\text{C}_4$  alkenes, benzene,

428 toluene, acetylene and  $\text{NO}_2$ . It is reported that i-Pentane and aromatics (such as, benzene, toluene,

429 ethylbenzene and m/p-xylene) usually originated from gasoline evaporation, while isobutane and

430 n-butane were emitted from LPG/CNG usage (Li et al., 2017a; Liu et al., 2008a). Considering the

431 wide consumption of CNG for residential cooking in Zhengzhou, this factor was defined as

432 CNG+gasoline evaporation.

433 The second factor was characterized based upon significant loading of toluene, ethylbenzene,

434 m/p-xylene, and 1,2,4-trimethylbenzene. According to previous studies (Yuan et al., 2010; Wang et

435 al., 2014), toluene and  $\text{C}_8$  -  $\text{C}_9$  aromatics were the major VOCs emitted from paint applications.

436 Therefore, Source 2 was assigned as the solvent use. This is consistent with the real situation that

437 there were widespread road paving and building constructions in Zhengzhou city. In addition, car

438 decoration, printing, and furniture manufacturing, which are associated with the use of adhesives,

439 were also included in this source category.

440 The third source was associated with the significant portion of long chain alkanes ( $\text{C}_7$  -  $\text{C}_9$ ) and

441 high amounts of toluene, which are tracers for diesel evaporation (Liu et al., 2008a). Therefore,

442 Source 3 was identified as the diesel vapor. Beside on-road vehicles, many non-road mobile

443 machineries used for building or railway station constructions were correlated with this source.



444 Source 4 was dominated by trans-2-butene and 1-butene. These species were mainly produced  
445 in coal combustion (Liu et al., 2008a; Yan et al., 2016). Liu et al. (2016b) reported that 1-butene  
446 was a critical VOC generated during the smoldering process of coal combustion. This factor was  
447 thus categorized as the coal combustion.

448 The fifth factor shows a dominant loading of cyclohexane, methylcyclohexane, styrene,  
449 2-methylhexane and 3-methylhexane. The first three VOCs were identified as the components  
450 heavily impacted by petrochemical industries (Jobson et al., 2004). Therefore, this source was  
451 defined as the petrochemical.

452 Source 6 was composed of ethylene, propylene, benzene, toluene, 3-methylpentane, n-heptane,  
453 acetylene and NO<sub>2</sub>. In urban areas, vehicle emissions are a major source for ethylene and propylene  
454 (Wang et al., 2017a). Fossil fuel combustion produces large amounts of acetylene (Ho et al., 2009),  
455 while NO<sub>2</sub> is a typical tracer for vehicle exhaust (Huang et al., 2015a). The source was referred to  
456 as the vehicle exhaust.

457 Source 7 was distinguished by extremely high compositions of isoprene, a species mainly  
458 produced by vegetation through photosynthesis (Millet et al., 2016). Even though, it can be emitted  
459 from traffic-related sources (Yuan et al., 2009), this possibility can be ignored by its poor  
460 correlations with other source makers of vehicle exhaust (such as, i-pentane and ethylene).  
461 Therefore, this source was identified as the biogenic emissions.

462 Factor 8 was only resolved for the JK site. The major compounds present in this source were  
463 ethylene, propylene, acetylene and NO<sub>2</sub>. These compounds mainly originated from on-road vehicles  
464 (Wang et al., 2017a). Since there were minor contributions of alkanes and aromatics, they were  
465 possibly derived from on-road vehicles under different running conditions. This factor was named  
466 as the traffic-related source.

467 According to the source apportionment results (Fig. 9), CNG usage, gasoline evaporation and  
468 vehicle exhaust had considerable portions and were the important sources for ambient VOCs at  
469 every site. The smallest contribution from CNG and gasoline evaporations was found at GS  
470 (24.99%), which was lower than the values observed at JK (35.06%) and YH (34.28%), and was



471 probably caused by the heavier traffic at JK and larger consumption of CNG (from the condensed  
472 canteens and active household cooking) at YH. The distribution of petrochemical source was  
473 uneven on the regional scale, with the largest portion observed at MEM (11.56%) and comparable  
474 values found for JK (3.44%), YH (6.21%) and GS (5.56%). These results are in accordance with  
475 the fact the distance between the petrochemical plants and the sampling site of MEM was the  
476 shortest (*ca.* 2 km). The weighted percentages attributed to the solvent use were similar among the  
477 four sites, with the highest value of 12.41% at MEM, which was consistent with the fact that there  
478 was less abundance of aromatics in Zhengzhou city. The emission source related to diesel fuel was  
479 more evident at JK (11.76%). The area was rife with logistics companies and frequently suffered  
480 from disturbance of heavy-duty cargo vehicles powered by diesel fuel. Coal combustion impacted  
481 the ambient air heavily at MEM (17.84%) and GS (13.50%), which were only 2 km and 5 km away  
482 from the thermal power plants, respectively. Overall, the traffic-related source was the most  
483 important emission source for VOCs in Zhengzhou, which is in accordance with the results  
484 obtained for other urban areas (Yuan et al., 2013b;Lyu et al., 2016;Lau et al., 2010).

### 485 **3.7 Long-range transport**

486 Air transported from surrounding areas had impacts on the air quality at the study site  
487 (Langford et al., 2010;Sun et al., 2018). In this work, Hybrid Single-Particle Lagrangian Integrated  
488 Trajectory (HYSPLIT) model was used to present the long-range transport effects on the air quality  
489 of Zhengzhou city (Fig. 10). Meteorological conditions are important factors that impact both the  
490 compositions and levels of VOCs. Clusters arriving at Zhengzhou in May, 2017 demonstrated  
491 longer paths, and included six clusters in total. The largest one (27.2%) was originated from  
492 Yinchuan city, which is a central city in northwest China. The cluster passed over several  
493 non-capital cities (such as, Yanan, Yuncheng and Luoyang) in Shanxi and Sichuan provinces. Such  
494 long-range transportation of pollutants might have less impact on the air quality of Zhengzhou,  
495 which agrees well with the comparable levels and similar compositions of VOCs during the period  
496 of May - June. In the months of June, August and September, approximately half of the air currents  
497 originated from the areas of Henan province. The air current originating from Hubei province took  
498 up the largest portion (*ca.* 88.68%) of clusters in July, and potentially led to a significant variation



499 in the concentration or composition of VOCs. As illustrated in Fig. 2, the average concentration  
500 level of  $\Sigma_{\text{PAMS}}$  in July sharply decreased to  $15.91 \pm 6.54$  ppbv. This was accompanied by the  
501 weighted percentage of aromatics, which dropped to  $10.30 \pm 4.23\%$ . It is well known that alkenes  
502 and aromatics have high photochemical reactivity. The T/B ratio also showed the lowest level  
503 ( $1.15 \pm 0.99$ ) around this period, illustrating that the air plumes had longer lifetime. Both of these  
504 evidenced that Zhengzhou was impacted by air pollutants, which originated from Hubei province.  
505 According to previous studies in Wuhan, the capital city of Hubei province, the average total  $\Sigma_{\text{PAMS}}$   
506 ( $23.3 \pm 0.6$  ppbv) (Lyu et al., 2016) was much lower than the average level in Zhengzhou  
507 ( $31.57 \pm 23.35$  ppbv). The cleaner air mass clusters, originating from Hubei in July, can thus be  
508 designated as a dilute flow.

#### 509 4. Conclusions

510 In this study, PAMS were collected at four different sites in Zhengzhou, Henan (China) for the  
511 first time.  $\text{C}_2$  -  $\text{C}_5$  alkanes, acetylene, ethylene, toluene and benzene were the most abundant VOCs  
512 in the region. On the basis of monthly average, the maximum  $\Sigma_{\text{PAMS}}$  was observed at GS, which  
513 was impacted by various emission sources. In comparison to other Chinese cities, the weighted  
514 percentage of aromatics was lower, while higher alkyne level was observed in Zhengzhou city. Due  
515 to less anthropogenic emissions and more favorable dispersion conditions, most of the air pollutants  
516 had the lowest levels in the mid-summer month of July. Overall, the  $\text{O}_3$  levels were correlated with  
517  $\Sigma_{\text{PAMS}}$ , which potentially demonstrated that the  $\text{O}_3$  formation was more sensitive to the abundance  
518 of VOCs in Zhengzhou. Different from other megacities, alkenes were the biggest contributors to  
519 OFP, while acetylene was particularly critical at each site. The CNG usage, gasoline evaporation  
520 and vehicle exhaust were the important sources for ambient VOCs. Cleaner air clusters from Hubei  
521 occasionally arrived at Zhengzhou. This study provides the first-hand information on the  
522 characteristics of VOCs and assists in overcoming the  $\text{O}_3$  pollution issue in Zhengzhou city, China.

#### 523 Acknowledgements

524 This research was supported by the Key Program of National Natural Science Foundation of  
525 China (Grant No. 91744209).



527 **Table & Figure**

528 Table1. Detailed information on the calibration curve for 57 PAMS and their MIR

| Species                   | R <sup>2</sup> | MDL(ppbv) | RSD | MIR  |                 | Species                 | R <sup>2</sup> | MDL(ppbv) | RSD | MIR   |
|---------------------------|----------------|-----------|-----|------|-----------------|-------------------------|----------------|-----------|-----|-------|
| Ethane                    | 0.9998         | 6.8       | 5%  | 0.28 |                 | Ethylene                | 0.9997         | 12.5      | 10% | 9     |
| Propane                   | 0.9998         | 2.8       | 2%  | 0.49 |                 | Propylene               | 0.9998         | 6.2       | 5%  | 11.66 |
| Isobutane                 | 0.9998         | 3.2       | 3%  | 1.23 |                 | Trans-2-butene          | 1              | 3.6       | 6%  | 15.16 |
| n-Butane                  | 0.9998         | 6.7       | 5%  | 1.15 |                 | 1-Butene                | 0.9995         | 7.8       | 6%  | 9.73  |
| Cyclopentane              | 0.9971         | 8.5       | 7%  | 0.09 |                 | Cis-2-butene            | 0.9997         | 6.8       | 6%  | 14.24 |
| Isopentane                | 0.9999         | 5.5       | 4%  | 0.93 | <b>Alkene</b>   | 1,3-butadiene           | 0.9874         | 13.5      | 8%  |       |
| n-Pentane                 | 0.9999         | 6.6       | 5%  | 0.88 |                 | 1-Pentene               | 0.9764         | 6.3       | 5%  | 7.21  |
| 2,2-Dimethyl-butane       | 0.9963         | 5.4       | 4%  | 1.17 |                 | Trans-2-pentene         | 0.9964         | 10.1      | 7%  | 10.56 |
| 2,3-Dimethylbutane        | 0.9966         | 7.6       | 6%  | 0.97 |                 | Isoprene                | 0.9966         | 7.7       | 6%  | 10.61 |
| 2-Methylpentane           | 0.9958         | 8.0       | 6%  | 1.5  |                 | Cis-2-pentene           | 0.9965         | 8.6       | 7%  | 10.38 |
| 3-Methylpentane           | 0.9967         | 5.4       | 4%  | 1.8  |                 | 1-Hexene                | 0.9961         | 11.4      | 9%  | 4.4   |
| <b>Alkane</b><br>n-Hexane | 0.9967         | 7.3       | 6%  | 1.24 | <b>Alkyne</b>   | Acetylene               | 0.9996         | 7.1       | 5%  | 0.95  |
| 2,4-Dimethylpentane       | 0.9972         | 9.6       | 7%  | 1.55 |                 | Benzene                 | 0.9975         | 6.5       | 5%  | 0.72  |
| Methyl-cyclopentane       | 0.9974         | 5.8       | 5%  | 2.19 |                 | Toluene                 | 0.9963         | 4.3       | 4%  | 4     |
| 2-Methyl-hexane           | 0.9968         | 8.6       | 7%  | 1.19 |                 | Ethyl-benzene           | 0.9955         | 4.8       | 4%  | 3.04  |
| Cyclohexane               | 0.9958         | 7.7       | 6%  | 1.25 |                 | m,p-Xylene <sup>a</sup> | 0.9969         | 12.5      | 5%  | 7.8   |
| 2,3-Dimethyl-pentane      | 0.9969         | 6.2       | 5%  | 1.34 |                 | o-Xylene                | 0.9954         | 5.2       | 4%  | 7.64  |
| 3-Methyl-hexane           | 0.9946         | 8.8       | 7%  | 1.61 | <b>Aromatic</b> | Styrene                 | 0.9961         | 10.6      | 8%  | 1.73  |
| 2,2,4-Trimethyl-pentane   | 0.9975         | 7.1       | 6%  | 1.26 |                 | Isopropylbenzene        | 0.9947         | 4.3       | 4%  | 2.52  |
| n-Heptane                 | 0.9974         | 9         | 7%  | 1.07 |                 | n-Propylbenzene         | 0.9929         | 1.6       | 1%  | 2.03  |
| Methyl-cyclohexane        | 0.9972         | 5.8       | 5%  | 1.7  |                 | m-Ethyltoluene          | 0.9910         | 7.3       | 6%  | 7.39  |
| 2,3,4-Trimethyl-pentane   | 0.9976         | 5.7       | 5%  | 1.03 |                 | p-Ethyltoluene          | 0.9994         | 8.4       | 7%  | 4.44  |



|                  |        |     |    |      |                         |        |     |    |       |
|------------------|--------|-----|----|------|-------------------------|--------|-----|----|-------|
| 2-Methyl-heptane | 0.9971 | 7.0 | 6% | 1.07 | 1,3,5-Trimethyl-benzene | 0.9994 | 6.1 | 5% | 11.76 |
| 3-Methyl-heptane | 0.9974 | 6.7 | 5% | 1.24 | o-Ethyltoluene          | 0.9995 | 4.3 | 4% | 5.59  |
| n-Octane         | 0.9973 | 7.6 | 6% | 0.9  | 1,2,4-Trimethylbenzene  | 0.9983 | 9.7 | 8% | 8.87  |
| n-Nonane         | 0.9963 | 3.4 | 3% | 0.78 | 1,2,3-Trimethylbenzene  | 0.9927 | 9.7 | 8% | 11.97 |
| n-Decane         | 0.9935 | 7.8 | 6% | 0.68 | m-Diethylbenzene        | 0.9967 | 5.2 | 4% | 7.1   |
| n-Undecane       | 0.9919 | 7.5 | 6% | 0.61 | p-Diethylbenzene        | 0.9950 | 4.2 | 3% | 4.43  |

529 <sup>a</sup> *m*-Xylene and *p*-Xylene are co-eluted in the chromatographic separation.

530



531

Table 2. Wind speed ( $\text{m}\cdot\text{s}^{-1}$ ) during the sampling period

|                  | JK        | MEM       | YH        | GS        |
|------------------|-----------|-----------|-----------|-----------|
| <b>May</b>       | 1.34±0.65 | 1.86±1.19 | 1.27±0.66 | 0.97±0.49 |
| <b>June</b>      | 1.07±0.48 | 1.86±0.94 | 0.97±0.36 | 0.74±0.33 |
| <b>July</b>      | 1.48±0.59 | 2.62±1.19 | 1.15±0.45 | 0.90±0.32 |
| <b>August</b>    | 1.06±0.48 | 1.86±0.94 | 0.95±0.39 | 0.76±0.35 |
| <b>September</b> | 0.80±0.38 | 1.24±0.80 | 0.82±0.43 | 0.62±0.38 |

532

533



534 Table 3. Concentrations of Top 10 PAMS and  $\Sigma$ PAMS (ppbv) at every site during the sampling  
535 period

| Site          | JK                      |       |               | MEM             |       |               | GS                      |       |               | YH         |       |      |
|---------------|-------------------------|-------|---------------|-----------------|-------|---------------|-------------------------|-------|---------------|------------|-------|------|
| Item          | Species                 | Mean  | Std.          | Species         | Mean  | Std.          | Species                 | Mean  | Std.          | Species    | Mean  | Std. |
| May.2017      | Acetylene               | 4.39  | 2.48          | Ethane          | 5.17  | 2.18          | Ethane                  | 4.71  | 2.18          | Acetylene  | 4.74  | 2.61 |
|               | Ethane                  | 4.29  | 1.43          | Acetylene       | 4.22  | 1.60          | Propane                 | 3.55  | 3.79          | Ethane     | 4.42  | 1.87 |
|               | Ethylene                | 3.77  | 2.57          | Ethylene        | 3.42  | 1.70          | Acetylene               | 3.14  | 1.69          | Ethylene   | 4.27  | 4.02 |
|               | Toluene                 | 3.19  | 3.36          | Propane         | 3.02  | 2.05          | Toluene                 | 3.05  | 3.66          | Propane    | 2.58  | 1.48 |
|               | Propane                 | 2.61  | 1.23          | n-Butane        | 1.77  | 1.68          | Ethylene                | 2.92  | 1.92          | Toluene    | 2.28  | 2.60 |
|               | Isopentane              | 2.52  | 3.03          | Benzene         | 1.68  | 2.48          | 2-Methylpentane         | 2.56  | 6.54          | n-Butane   | 1.54  | 0.95 |
|               | n-Butane                | 2.20  | 1.75          | Toluene         | 1.59  | 1.53          | Isopentane              | 1.97  | 1.38          | Isopentane | 1.32  | 1.04 |
|               | m,p-Xylene <sup>a</sup> | 2.17  | 2.63          | Isopentane      | 1.21  | 0.70          | n-Butane                | 1.78  | 1.80          | Isoprene   | 1.32  | 1.31 |
|               | Benzene                 | 1.87  | 2.11          | 2-Methylpentane | 1.13  | 2.19          | Cyclohexane             | 1.58  | 4.72          | Benzene    | 1.19  | 1.07 |
|               | Isoprene                | 1.75  | 1.67          | Isobutane       | 1.13  | 1.33          | Isobutane               | 1.52  | 3.14          | Isobutane  | 0.84  | 0.53 |
| $\Sigma$ PAMS | 37.65                   | 22.58 | $\Sigma$ PAMS | 29.30           | 15.34 | $\Sigma$ PAMS | 31.73                   | 18.70 | $\Sigma$ PAMS | 30.05      | 16.43 |      |
| June.2017     | Acetylene               | 4.62  | 1.50          | Ethane          | 6.33  | 3.09          | Acetylene               | 5.03  | 1.83          | Acetylene  | 4.60  | 1.41 |
|               | Ethane                  | 3.48  | 1.47          | Cyclohexane     | 5.18  | 11.87         | Ethane                  | 4.49  | 2.52          | Ethane     | 3.85  | 1.46 |
|               | Ethylene                | 3.22  | 1.52          | Isopentane      | 4.95  | 8.30          | Ethylene                | 3.27  | 1.16          | Ethylene   | 3.05  | 0.90 |
|               | Propane                 | 2.32  | 1.43          | Toluene         | 4.35  | 8.21          | Toluene                 | 3.14  | 3.03          | Propane    | 2.48  | 0.99 |
|               | n-Butane                | 2.30  | 2.98          | Isobutane       | 4.16  | 10.30         | Ethane                  | 3.09  | 2.07          | Isoprene   | 1.67  | 1.62 |
|               | Isoprene                | 2.08  | 1.58          | Propane         | 3.66  | 3.66          | n-Butane                | 1.84  | 1.53          | n-Butane   | 1.54  | 0.87 |
|               | Toluene                 | 1.99  | 1.79          | Acetylene       | 3.45  | 2.05          | m,p-Xylene <sup>a</sup> | 1.83  | 2.75          | Toluene    | 1.44  | 1.65 |
|               | m,p-Xylene <sup>a</sup> | 1.69  | 2.00          | n-Butane        | 2.51  | 3.51          | Isopentane              | 1.74  | 1.58          | Isopentane | 1.38  | 1.30 |
|               | Isopentane              | 1.59  | 1.56          | Benzene         | 2.50  | 4.58          | Isobutane               | 1.70  | 2.63          | Benzene    | 1.04  | 0.61 |
|               | Benzene                 | 1.30  | 0.72          | Ethylene        | 2.41  | 1.34          | Benzene                 | 1.41  | 0.90          | Isobutane  | 0.99  | 0.49 |
| $\Sigma$ PAMS | 34.02                   | 19.89 | $\Sigma$ PAMS | 30.28           | 12.77 | $\Sigma$ PAMS | 39.29                   | 25.37 | $\Sigma$ PAMS | 28.33      | 11.94 |      |
| July.2017     | Acetylene               | 2.55  | 1.47          | Ethane          | 4.00  | 2.08          | Ethane                  | 2.96  | 1.80          | Ethane     | 2.75  | 0.77 |
|               | Ethane                  | 2.30  | 0.95          | Isopentane      | 2.13  | 3.84          | Propane                 | 2.56  | 2.23          | Acetylene  | 1.84  | 0.73 |





|           |               |       |       |               |       |       |               |       |       |                 |       |       |
|-----------|---------------|-------|-------|---------------|-------|-------|---------------|-------|-------|-----------------|-------|-------|
|           | n-Butane      | 1.46  | 0.84  | Acetylene     | 2.11  | 0.86  | Isopentane    | 1.99  | 2.09  | Isopentane      | 1.73  | 2.30  |
|           | Isoprene      | 1.42  | 1.45  | Propane       | 2.08  | 1.31  | Acetylene     | 1.58  | 0.71  | Propane         | 1.52  | 0.57  |
|           | Propane       | 1.38  | 0.65  | Ethylene      | 1.36  | 0.97  | Isobutane     | 1.37  | 1.85  | Trans-2-pentene | 1.36  | 1.49  |
|           | Isopentane    | 1.26  | 1.24  | n-Butane      | 1.36  | 1.12  | n-Butane      | 1.36  | 1.12  | n-Butane        | 1.08  | 0.55  |
|           | Ethylene      | 1.20  | 0.84  | Isobutane     | 1.05  | 1.58  | Ethylene      | 1.18  | 1.05  | Ethylene        | 1.05  | 0.65  |
|           | Isobutane     | 0.75  | 0.57  | Toluene       | 0.72  | 0.74  | Toluene       | 1.15  | 1.81  | Isobutane       | 0.98  | 1.22  |
|           | Benzene       | 0.51  | 0.22  | Benzene       | 0.55  | 0.34  | Isoprene      | 1.12  | 0.99  | Toluene         | 0.62  | 0.71  |
|           | Toluene       | 0.49  | 0.45  | Isoprene      | 0.54  | 0.52  | n-Pentane     | 0.60  | 0.60  | Benzene         | 0.55  | 0.36  |
|           | $\Sigma$ PAMS | 16.01 | 6.13  | $\Sigma$ PAMS | 20.74 | 12.66 | $\Sigma$ PAMS | 19.60 | 13.94 | $\Sigma$ PAMS   | 15.95 | 7.54  |
|           | Ethane        | 3.41  | 1.62  | Ethane        | 5.90  | 2.88  | Ethane        | 3.97  | 2.51  | Ethane          | 3.77  | 1.43  |
|           | Isopentane    | 2.69  | 2.98  | Isopentane    | 3.49  | 7.25  | Acetylene     | 2.45  | 2.08  | Propane         | 2.81  | 1.27  |
|           | Propane       | 2.38  | 1.72  | Propane       | 2.58  | 1.40  | Propane       | 2.12  | 1.33  | Isopentane      | 2.58  | 3.93  |
|           | Acetylene     | 1.94  | 1.01  | Acetylene     | 2.19  | 1.50  | Isopentane    | 1.51  | 1.41  | Acetylene       | 2.04  | 1.11  |
|           | n-Butane      | 1.81  | 1.65  | Ethylene      | 1.43  | 0.99  | Ethylene      | 1.35  | 1.09  | n-Butane        | 1.75  | 0.85  |
| Aug.2017  | Ethylene      | 1.52  | 1.28  | n-Butane      | 1.41  | 0.90  | Toluene       | 1.28  | 1.97  | n-Pentane       | 1.72  | 2.63  |
|           | Isoprene      | 1.02  | 0.99  | n-Pentane     | 1.10  | 1.88  | n-Butane      | 1.25  | 0.91  | Toluene         | 1.52  | 1.85  |
|           | n-Pentane     | 0.98  | 0.89  | Toluene       | 0.98  | 1.40  | Isoprene      | 0.87  | 0.77  | Ethylene        | 1.32  | 0.70  |
|           | Isobutane     | 0.90  | 0.71  | Isobutane     | 0.91  | 0.76  | n-Pentane     | 0.76  | 0.72  | Isobutane       | 1.14  | 0.82  |
|           | Toluene       | 0.89  | 0.98  | Benzene       | 0.53  | 0.28  | Isobutane     | 0.68  | 0.47  | Trans-2-pentene | 1.11  | 1.39  |
|           | $\Sigma$ PAMS | 21.54 | 15.29 | $\Sigma$ PAMS | 24.37 | 20.79 | $\Sigma$ PAMS | 20.49 | 15.67 | $\Sigma$ PAMS   | 26.03 | 17.01 |
|           | Ethane        | 4.66  | 2.21  | Ethane        | 6.87  | 3.92  | Propane       | 10.77 | 17.73 | Ethane          | 5.35  | 2.65  |
|           | Propane       | 3.54  | 2.19  | Acetylene     | 3.82  | 3.76  | n-Butane      | 7.55  | 13.79 | Acetylene       | 5.08  | 8.36  |
|           | Acetylene     | 3.27  | 3.09  | Isopentane    | 3.73  | 6.25  | Isobutane     | 5.46  | 10.76 | Toluene         | 4.37  | 5.28  |
|           | n-Butane      | 2.52  | 1.96  | Propane       | 3.31  | 1.83  | Isopentane    | 5.25  | 8.76  | Propane         | 3.29  | 1.93  |
| Sept.2017 | Ethylene      | 2.02  | 1.48  | Toluene       | 2.71  | 4.31  | Ethane        | 5.08  | 2.20  | Isopentane      | 2.89  | 3.02  |
|           | Isopentane    | 1.77  | 1.49  | Ethylene      | 2.37  | 1.55  | Acetylene     | 4.03  | 5.84  | Ethylene        | 2.67  | 2.03  |
|           | Toluene       | 1.44  | 1.42  | n-Butane      | 2.23  | 1.53  | Toluene       | 2.50  | 3.54  | n-Butane        | 2.47  | 2.19  |
|           | Isobutane     | 1.08  | 0.79  | n-Pentane     | 1.70  | 2.63  | n-Pentane     | 2.33  | 3.44  | n-Pentane       | 1.39  | 1.22  |



|                         |       |       |               |       |       |               |       |       |                         |       |       |
|-------------------------|-------|-------|---------------|-------|-------|---------------|-------|-------|-------------------------|-------|-------|
| m,p-Xylene <sup>a</sup> | 0.93  | 1.13  | Isobutane     | 1.33  | 1.10  | Ethylene      | 2.19  | 1.68  | Isobutane               | 1.19  | 0.86  |
| n-Pentane               | 0.75  | 0.61  | Benzene       | 0.60  | 0.43  | Propylene     | 0.73  | 0.76  | m,p-Xylene <sup>a</sup> | 1.09  | 1.62  |
| $\Sigma$ PAMS           | 26.20 | 16.22 | $\Sigma$ PAMS | 34.15 | 23.85 | $\Sigma$ PAMS | 30.36 | 19.76 | $\Sigma$ PAMS           | 32.56 | 19.76 |

536 <sup>a</sup> *m*-Xylene and *p*-Xylene are co-eluted in the chromatographic separation.

537



538

539 Table 4. Average mixing ratios of NO<sub>x</sub>, O<sub>3</sub>, CO, SO<sub>2</sub> and ΣPAMS in the sampling campaign

| Site | NO <sub>x</sub> | O <sub>3</sub> | CO        | SO <sub>2</sub> | ΣPAMS       |
|------|-----------------|----------------|-----------|-----------------|-------------|
| GS   | 32.21±27.24     | 52.53±36.02    | 0.84±0.28 | 6.80±4.33       | 31.66±28.73 |
| JK   | 34.11±34.17     | 49.50±33.66    | 0.79±0.31 | 4.51±3.24       | 28.63±22.04 |
| MEM  | 36.42±32.21     | 47.09±32.66    | 0.92±0.31 | 6.44±4.75       | 27.67±18.09 |
| YH   | 29.31±27.84     | 52.00±31.92    | 0.84±0.25 | 4.95±3.88       | 27.45±18.28 |

540 Note: Units for air pollutants were ppbv except for CO, which was measured in ppmv

541



542 Table 5. Top 10 PAMS ranked according to calculated ozone formation potential (OFP)

| JK                      |           |       | MEM                     |           |       | YH                      |           |       | GS                      |           |       |
|-------------------------|-----------|-------|-------------------------|-----------|-------|-------------------------|-----------|-------|-------------------------|-----------|-------|
| species                 | OFP(ppbv) | (%)   | species                 | OFP(ppbv) | (%)   | species                 | OFP(ppbv) | (%)   | species                 | OFP(ppbv) | (%)   |
| Ethylene                | 18.99     | 25.54 | Ethylene                | 18.44     | 30.88 | Ethylene                | 19.83     | 28.10 | Ethylene                | 18.04     | 25.96 |
| Isoprene                | 12.99     | 21.83 | Isoprene                | 4.66      | 10.10 | Isoprene                | 7.44      | 11.30 | Isoprene                | 8.01      | 16.75 |
| m/p-Xylene <sup>a</sup> | 6.08      | 5.89  | Toluene                 | 3.73      | 6.67  | Toluene                 | 6.63      | 7.75  | Toluene                 | 7.43      | 7.67  |
| Toluene                 | 5.53      | 5.83  | Propylene               | 3.60      | 6.16  | m/p-Xylene <sup>a</sup> | 3.93      | 4.38  | Propylene               | 4.39      | 5.85  |
| Propylene               | 4.03      | 5.36  | Acetylene               | 2.82      | 5.00  | Acetylene               | 3.15      | 4.38  | m/p-Xylene <sup>a</sup> | 4.31      | 4.57  |
| Acetylene               | 2.97      | 4.44  | m/p-Xylene <sup>a</sup> | 2.55      | 4.20  | Propylene               | 3.01      | 3.60  | Acetylene               | 2.76      | 4.24  |
| n-Butane                | 2.15      | 3.05  | n-Butane                | 1.81      | 3.20  | Trans-2-pentene         | 2.25      | 2.94  | n-Butane                | 1.82      | 2.93  |
| o-Xylene                | 1.83      | 2.00  | Isopentane              | 1.76      | 3.16  | n-Butane                | 1.84      | 2.80  | Isopentane              | 1.71      | 2.68  |
| Isopentane              | 1.66      | 1.95  | Ethane                  | 1.58      | 2.96  | Isopentane              | 1.59      | 2.22  | Propane                 | 1.38      | 2.26  |
| Propane                 | 1.17      | 1.73  | Propane                 | 1.31      | 2.48  | Propane                 | 1.18      | 1.98  | Isobutane               | 1.13      | 1.98  |

543 <sup>a</sup> *m*-Xylene and *p*-Xylene are co-eluted in the chromatographic separation.

544

545



546

Table 6. Critical parameters for optimizing the PMF results

| Site           | JK      |             |         | MEM     |             |         | YH      |             |         | GS      |         |             |
|----------------|---------|-------------|---------|---------|-------------|---------|---------|-------------|---------|---------|---------|-------------|
|                | 6       | 7           | 8       | 5       | 6           | 7       | 6       | 7           | 8       | 6       | 7       | 8           |
| Factor Number  | 6       | 7           | 8       | 5       | 6           | 7       | 6       | 7           | 8       | 6       | 7       | 8           |
| Q(true)        | 2821.61 | 2246.40     | 1859.77 | 2793.06 | 2207.56     | 1789.63 | 2903.47 | 2458.26     | 2025.64 | 3396.21 | 2897.95 | 2520.45     |
| Q(robust)      | 2840.41 | 2263.57     | 1877.59 | 2808.12 | 2229.95     | 1793.15 | 2925.13 | 2469.35     | 2033.93 | 3426.53 | 2919.45 | 2539.44     |
| Q(true)/Q(exp) | 1.16    | <b>0.98</b> | 0.86    | 1.13    | <b>0.94</b> | 0.80    | 1.17    | <b>1.04</b> | 0.91    | 1.45    | 1.30    | <b>1.20</b> |

547

548

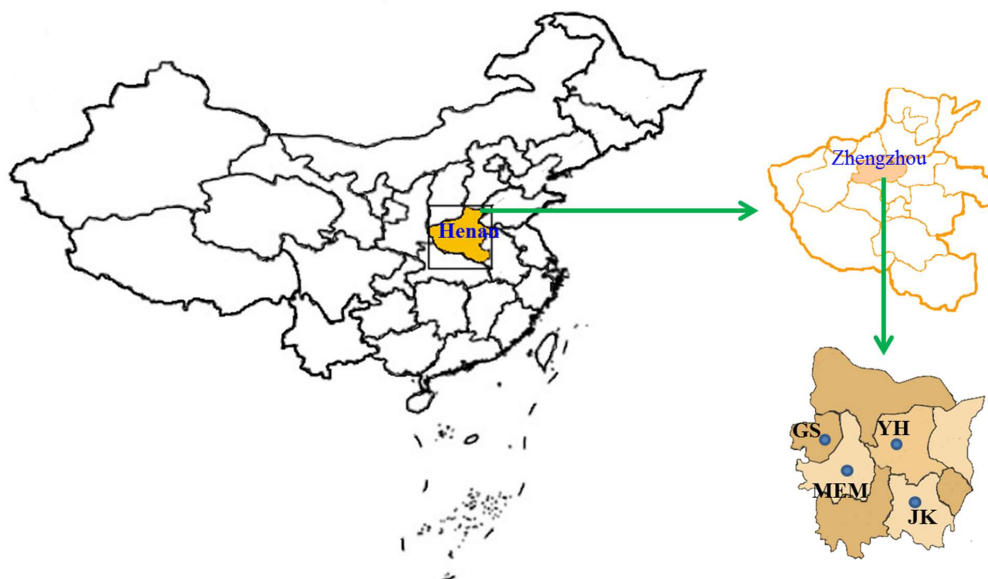

549

550

Fig 1. Map of Zhengzhou, China showing the locations of sampling sites.

551



552

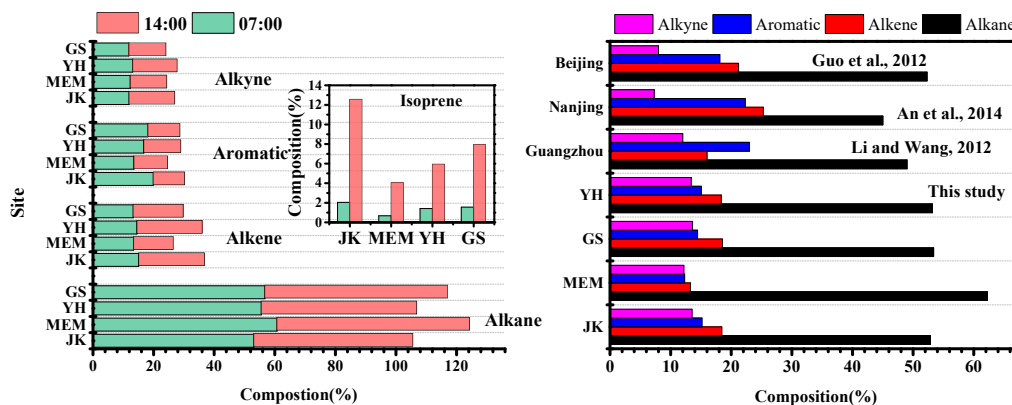

Fig 2. Compositions of major organic classes and comparison between Zhengzhou and other cities in China

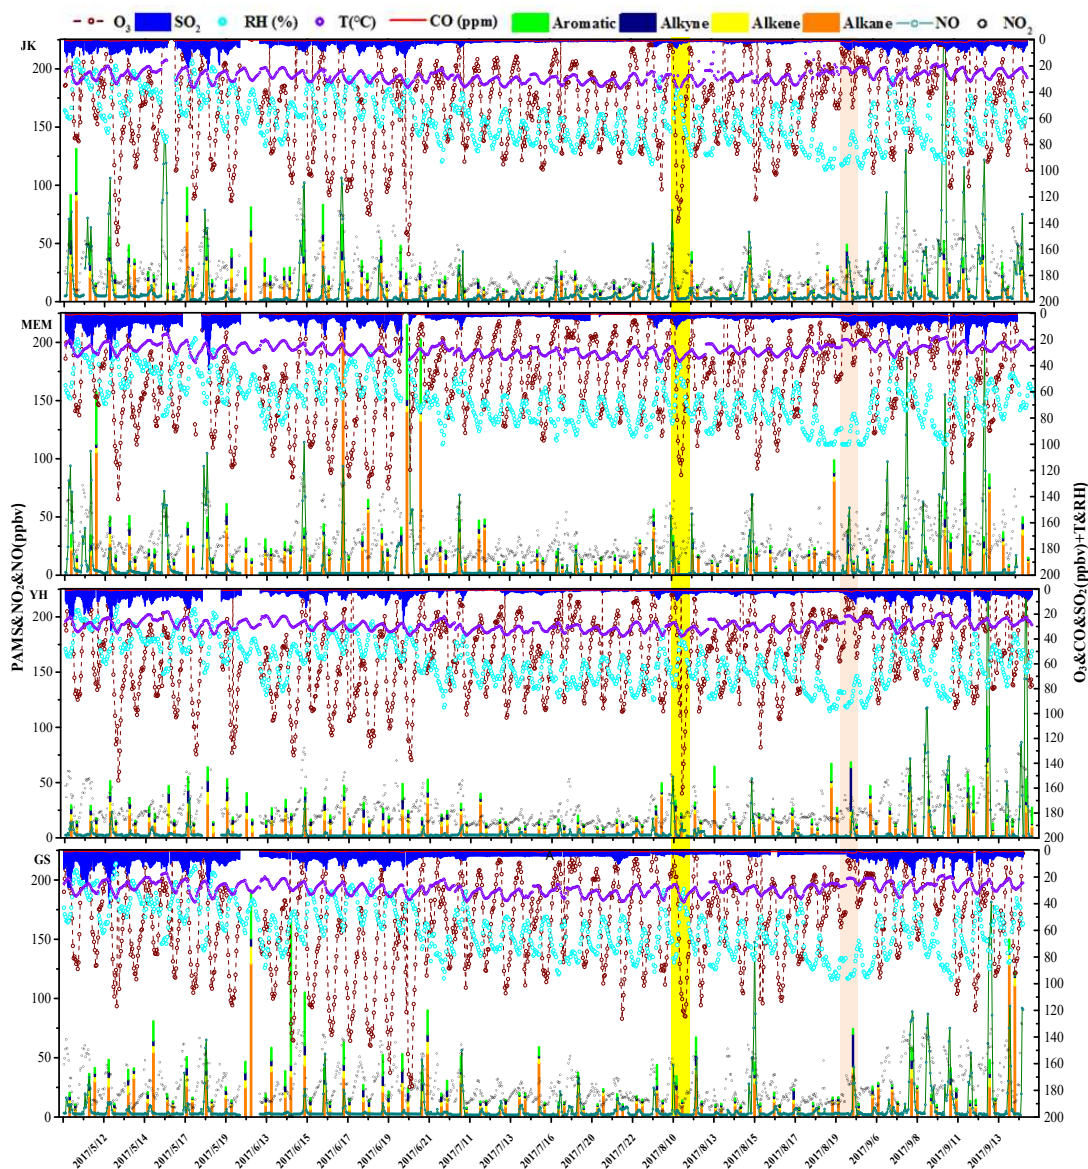

553

554

555 **Fig 3. Temporal variations of mixing ratios of PAMS, CO, SO<sub>2</sub>, NO, NO<sub>2</sub> and O<sub>3</sub> and**

556 **meteorological conditions at each site. 10<sup>th</sup> of August and 5<sup>th</sup> of September are highlighted as**

557 **yellow and pink, respectively.**

558



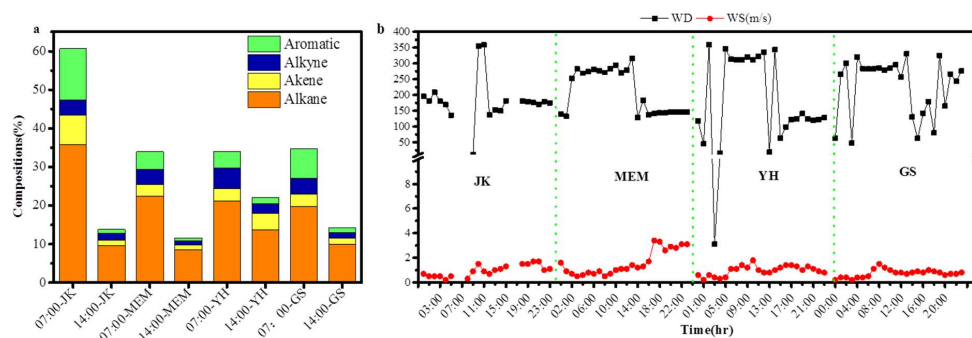

559

560 Fig.4. Temporal variation of compositions, wind direction and wind speed on 10<sup>th</sup> of August 2017

561

562

563

564

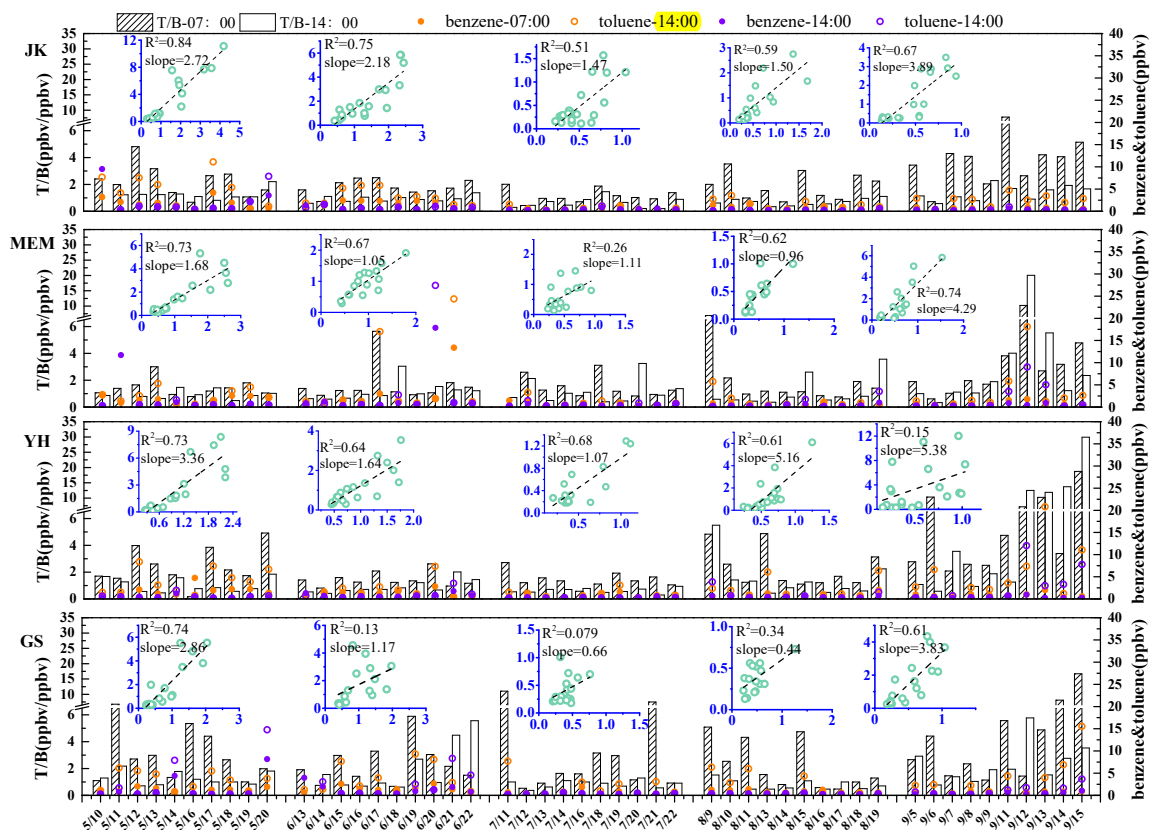

565

566

567 **Fig 5.** Time series of benzene and toluene and the correlation analysis between these two

568

compounds at every site

569 **Note:** The vertical axis in every small figure represents the mixing ratio of toluene (ppbv), while

570 the horizontal axis stands for benzene level (ppbv).

571

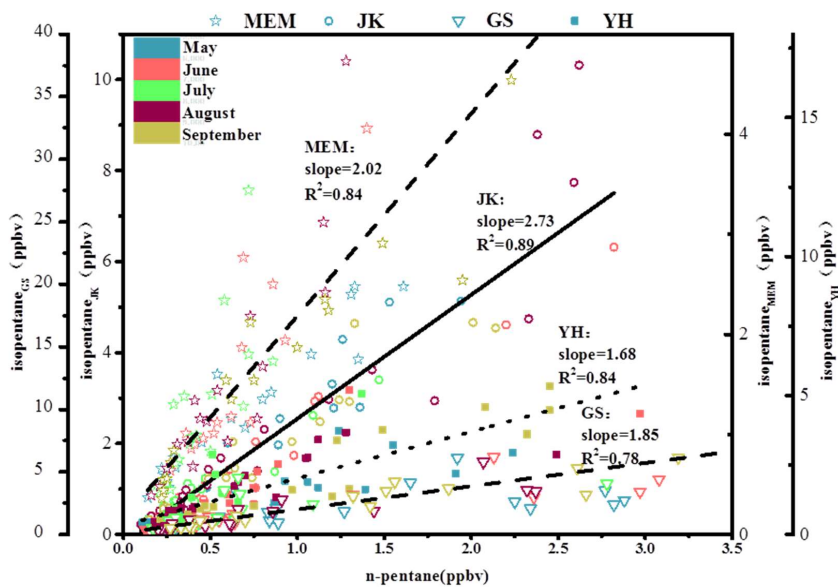

572

573

Fig 6. Ratios of isopentane to n-pentane at every site

574

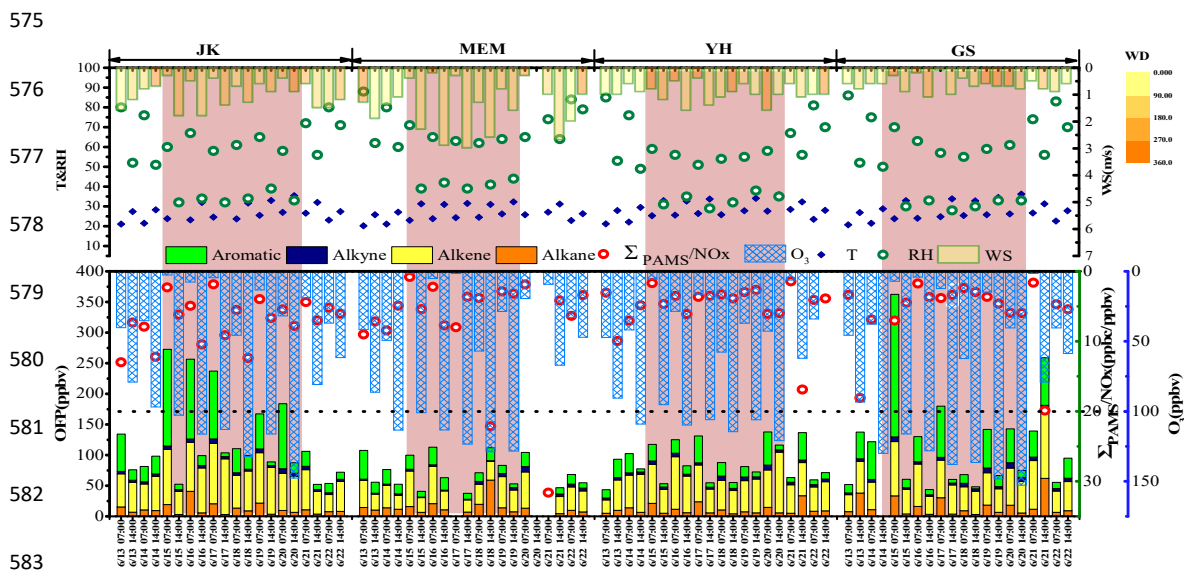

584 Fig 7. Spatio-temporal variations in meteorological factors, OFP of each organic group,  $\Sigma$ PAMS/NO<sub>x</sub>,  
585 and mixing ratios of O<sub>3</sub> in June. Clear days at RH<45% are highlighted in pink.

586

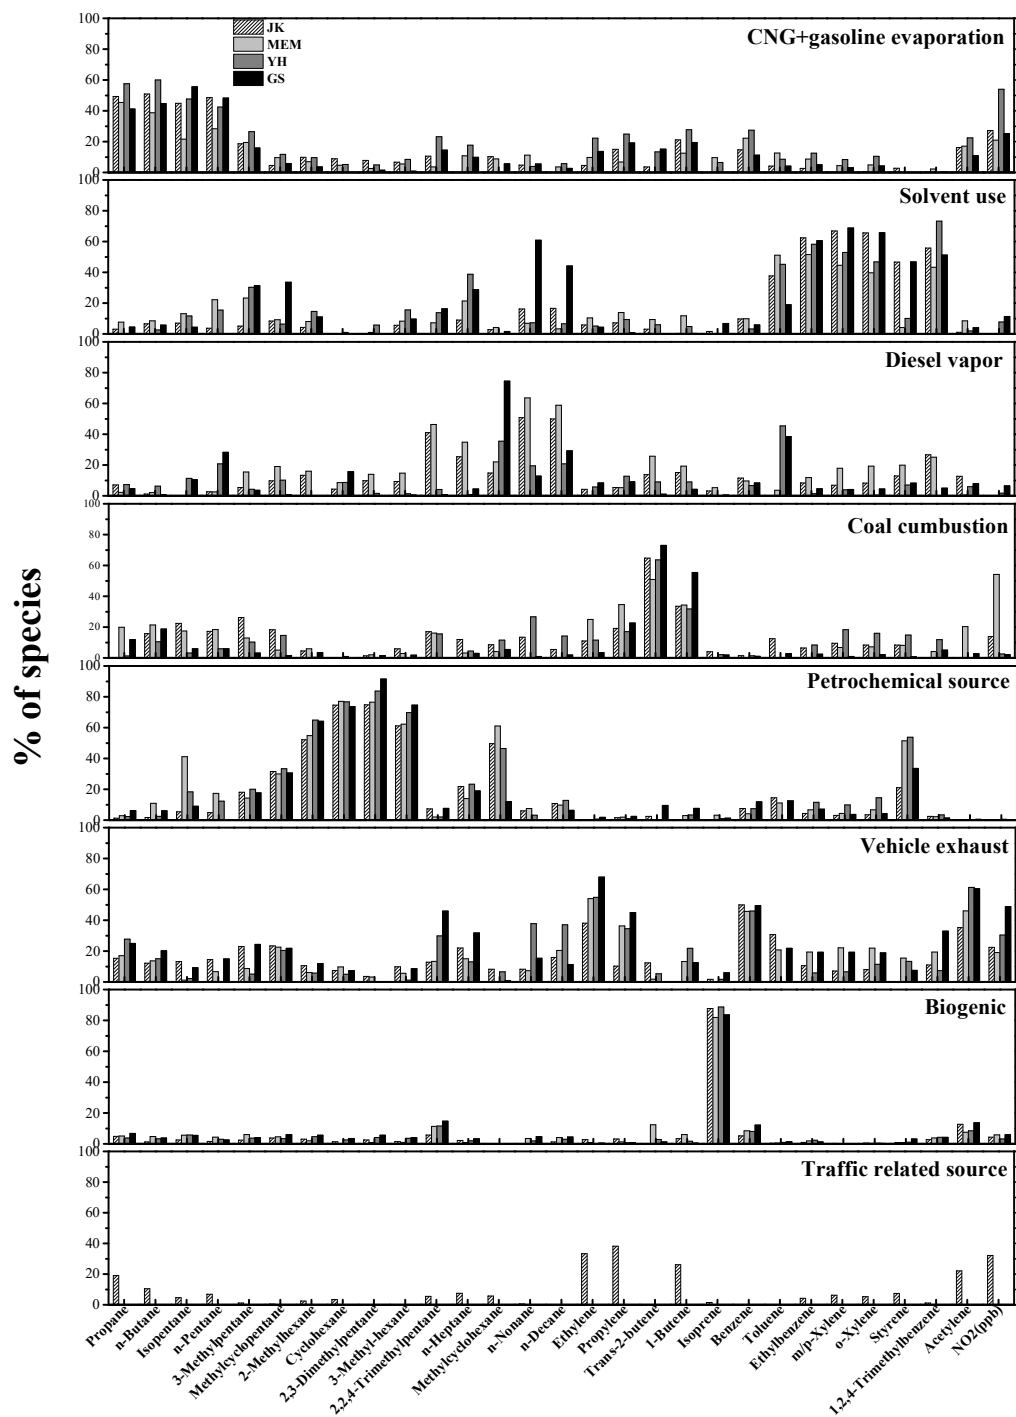



588

Fig. 8 Explained variations in source profiles as identified by PMF

589

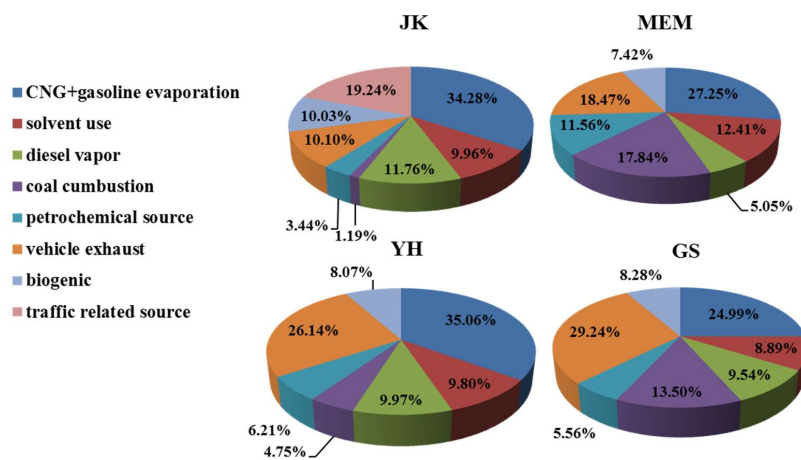

590

591

Fig 9. Source apportionment results during the whole sampling period.

592



593

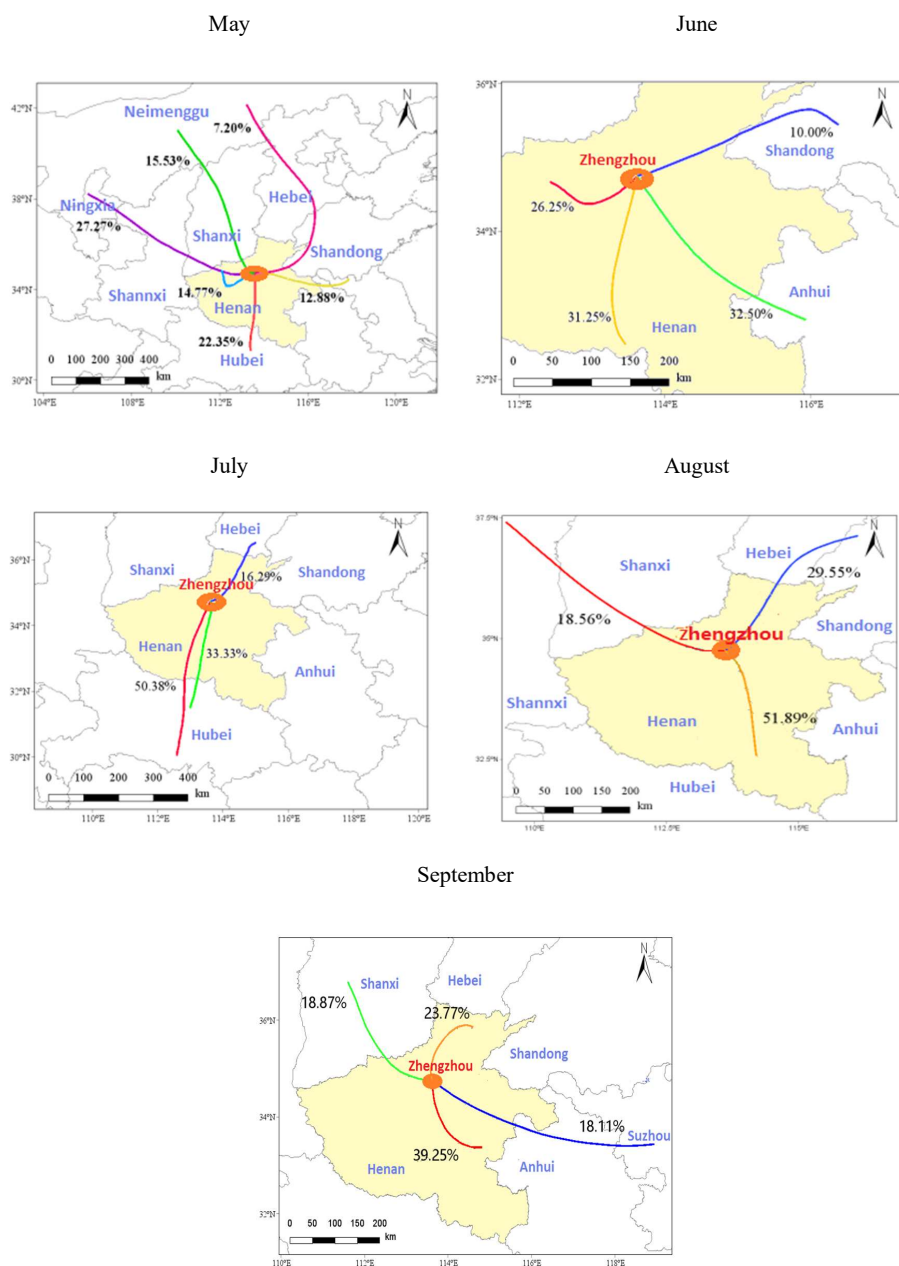

594

Fig 10. Cluster analysis of Zhengzhou in each sampling month

595

596 **Ref.**

- 597 Abeleira, A., Pollack, I. B., Sive, B., Zhou, Y., Fischer, E. V., and Farmer, D. K.: Source characterization of volatile  
598 organic compounds in the Colorado Northern Front Range Metropolitan Area during spring and summer 2015, *Journal*  
599 *of Geophysical Research: Atmospheres*, 10.1002/2016jd026227, 2017.
- 600 Akagi, S. K., Yokelson, R. J., Wiedinmyer, C., Alvarado, M. J., Reid, J. S., Karl, T., Crounse, J. D., and Wennberg, P.  
601 O.: Emission factors for open and domestic biomass burning for use in atmospheric models, *Atmospheric Chemistry*  
602 *and Physics*, 11, 4039-4072, 10.5194/acp-11-4039-2011, 2011.
- 603 An, J., Zhu, B., Wang, H., Li, Y., Lin, X., and Yang, H.: Characteristics and source apportionment of VOCs measured  
604 in an industrial area of Nanjing, Yangtze River Delta, China, *Atmospheric Environment*, 97, 206-214,  
605 10.1016/j.atmosenv.2014.08.021, 2014.
- 606 Barletta, B., Meinardi, S., Sherwood Rowland, F., Chan, C.-Y., Wang, X., Zou, S., Yin Chan, L., and Blake, D. R.:  
607 Volatile organic compounds in 43 Chinese cities, *Atmospheric Environment*, 39, 5979-5990,  
608 10.1016/j.atmosenv.2005.06.029, 2005.
- 609 Blanchard, C. L., and Hidy, G. M.: Ozone Response to Emission Reductions in the Southeastern United States,  
610 *Atmospheric Chemistry and Physics Discussions*, 1-33, 10.5194/acp-2017-534, 2017.
- 611 Capps, S. L., Hu, Y., and Russell, A. G.: Assessing Near-Field and Downwind Impacts of Reactivity-Based  
612 Substitutions, *Journal of the Air & Waste Management Association*, 60, 316-327, 10.3155/1047-3289.60.3.316, 2012.
- 613 Carter, W.P.L.: Updated maximum incremental reactivity scale and hydrocarbon bin reactivities for regulatory  
614 applications, Prepared for California Air Resources Board Contract 07-339, 2010.
- 615 Chen, S.-P., Liu, T.-H., Chen, T.-F., Yang, C.-F. O., Wang, J.-L., and Chang, J. S.: Diagnostic Modeling of PAMS  
616 VOC Observation, *Environ. Sci. Technol.*, 44, 4635-4644, 2010.
- 617 Chen, W. T., Shao, M., Lu, S. H., Wang, M., Zeng, L. M., Yuan, B., and Liu, Y.: Understanding primary and secondary  
618 sources of ambient carbonyl compounds in Beijing using the PMF model, *Atmospheric Chemistry and Physics*, 14,  
619 3047-3062, 10.5194/acp-14-3047-2014, 2014.
- 620 Cheng, L., Fu, L., Angle, R. P., and Sandhu, H. S.: Seasonal variations of volatile organic compounds in Edmonton,  
621 Alberta, *Atmospheric Environment*, 31, 239-246, 1997.
- 622 Duan, J., Tan, J., Yang, L., Wu, S., and Hao, J.: Concentration, sources and ozone formation potential of volatile  
623 organic compounds (VOCs) during ozone episode in Beijing, *Atmospheric Research*, 88, 25-35,  
624 10.1016/j.atmosres.2007.09.004, 2008.
- 625 Gao, W., Tie, X., Xu, J., Huang, R., Mao, X., Zhou, G., and Chang, L.: Long-term trend of O<sub>3</sub> in a mega City  
626 (Shanghai), China: Characteristics, causes, and interactions with precursors, *The Science of the total environment*,  
627 603-604, 425-433, 10.1016/j.scitotenv.2017.06.099, 2017.
- 628 Geddes, J. A., Murphy, J. G., and Wang, D. K.: Long term changes in nitrogen oxides and volatile organic compounds  
629 in Toronto and the challenges facing local ozone control, *Atmospheric Environment*, 43, 3407-3415,  
630 10.1016/j.atmosenv.2009.03.053, 2009.
- 631 Geng, F., Zhang, Q., Tie, X., Huang, M., Ma, X., Deng, Z., Yu, Q., Quan, J., and Zhao, C.: Aircraft measurements of  
632 O<sub>3</sub>, NO<sub>x</sub>, CO, VOCs, and SO<sub>2</sub> in the Yangtze River Delta region, *Atmospheric Environment*, 43, 584-593,  
633 10.1016/j.atmosenv.2008.10.021, 2009.
- 634 Geng, N., Wang, J., Xu, Y., Zhang, W., Chen, C., and Zhang, R.: PM<sub>2.5</sub> in an industrial district of Zhengzhou, China:  
635 Chemical composition and source apportionment, *Particuology*, 11, 99-109, 10.1016/j.partic.2012.08.004, 2013.





- 636 Gentner, D. R., Worton, D. R., Isaacman, G., Davis, L. C., Dallmann, T. R., Wood, E. C., Herndon, S. C., Goldstein, A.  
637 H., and Harley, R. A.: Chemical composition of gas-phase organic carbon emissions from motor vehicles and  
638 implications for ozone production, *Environmental science & technology*, 47, 11837-11848, 10.1021/es401470e, 2013.
- 639 Gilman, J. B., Lerner, B. M., Kuster, W. C., and de Gouw, J. A.: Source signature of volatile organic compounds from  
640 oil and natural gas operations in northeastern Colorado, *Environmental science & technology*, 47, 1297-1305,  
641 10.1021/es304119a, 2013.
- 642 Gong, M., Yin, S., Gu, X., Xu, Y., Jiang, N., and Zhang, R.: Refined 2013-based vehicle emission inventory and its  
643 spatial and temporal characteristics in Zhengzhou, China, *The Science of the total environment*, 599-600, 1149-1159,  
644 10.1016/j.scitotenv.2017.03.299, 2017.
- 645 Guo, H., Cheng, H. R., Ling, Z. H., Louie, P. K., and Ayoko, G. A.: Which emission sources are responsible for the  
646 volatile organic compounds in the atmosphere of Pearl River Delta?, *Journal of hazardous materials*, 188, 116-124,  
647 10.1016/j.jhazmat.2011.01.081, 2011.
- 648 Guo, H., Ling, Z. H., Cheng, H. R., Simpson, I. J., Lyu, X. P., Wang, X. M., Shao, M., Lu, H. X., Ayoko, G., Zhang, Y.  
649 L., Saunders, S. M., Lam, S. H. M., Wang, J. L., and Blake, D. R.: Tropospheric volatile organic compounds in China,  
650 *The Science of the total environment*, 574, 1021-1043, 10.1016/j.scitotenv.2016.09.116, 2017.
- 651 Guo, S., Tan, J., Duan, J., Ma, Y., Yang, F., He, K., and Hao, J.: Characteristics of atmospheric non-methane  
652 hydrocarbons during haze episode in Beijing, China, *Environmental monitoring and assessment*, 184, 7235-7246,  
653 10.1007/s10661-011-2493-9, 2012.
- 654 Han, D., Gao, S., Fu, Q., Cheng, J., Chen, X., Xu, H., Liang, S., Zhou, Y., and Ma, Y.: Do volatile organic compounds  
655 (VOCs) emitted from petrochemical industries affect regional PM 2.5 ?, *Atmospheric Research*, 209, 123-130,  
656 10.1016/j.atmosres.2018.04.002, 2018.
- 657 Hidy, G. M., and Blanchard, C. L.: Precursor reductions and ground-level ozone in the Continental United States,  
658 *Journal of the Air & Waste Management Association*, 65, 1261-1282, 10.1080/10962247.2015.1079564, 2015.
- 659 Ho, K. F., Lee, S. C., Ho, W. K., Blake, D. R., Cheng, Y., Li, Y. S., Ho, S. S. H., Fung, K., Louie, P. K. K., and Park,  
660 D.: Vehicular emission of volatile organic compounds (VOCs) from a tunnel study in Hong Kong, *Atmos. Chem. Phys.*,  
661 9, 7491-7504, 2009.
- 662 Hoque, R. R., Khillare, P. S., Agarwal, T., Shridhar, V., and Balachandran, S.: Spatial and temporal variation of BTEX  
663 in the urban atmosphere of Delhi, India, *The Science of the total environment*, 392, 30-40,  
664 10.1016/j.scitotenv.2007.08.036, 2008.
- 665 Huang, C., Wang, H. L., Li, L., Wang, Q., Lu, Q., de Gouw, J. A., Zhou, M., Jing, S. A., Lu, J., and Chen, C. H.: VOC  
666 species and emission inventory from vehicles and their SOA formation potentials estimation in Shanghai, China,  
667 *Atmospheric Chemistry and Physics*, 15, 11081-11096, 10.5194/acp-15-11081-2015, 2015a.
- 668 Huang, X., Zhang, Y., Yang, W., Huang, Z., Wang, Y., Zhang, Z., He, Q., Lü, S., Huang, Z., Bi, X., and Wang, X.:  
669 Effect of traffic restriction on reducing ambient volatile organic compounds (VOCs): Observation-based evaluation  
670 during a traffic restriction drill in Guangzhou, China, *Atmospheric Environment*, 161, 61-70,  
671 10.1016/j.atmosenv.2017.04.035, 2017.
- 672 Huang, Y., Ling, Z. H., Lee, S. C., Ho, S. S. H., Cao, J. J., Blake, D. R., Cheng, Y., Lai, S. C., Ho, K. F., Gao, Y., Cui,  
673 L., and Louie, P. K. K.: Characterization of volatile organic compounds at a roadside environment in Hong Kong: An  
674 investigation of influences after air pollution control strategies, *Atmospheric Environment*, 122, 809-818,  
675 10.1016/j.atmosenv.2015.09.036, 2015b.
- 676 Iannuzzi, A., Verga, M. C., Renis, M., Schiavo, A., Salvatore, V., Santoriello, C., Pazzano, D., Licenziati, M. R., and  
677 Polverino, M.: Air pollution and carotid arterial stiffness in children, *Cardiology in the young*, 20, 186-190,  
678 10.1017/S1047951109992010, 2010.



- 679 IARC: IARC (International Agency for Research on Cancer) Monographs on the Evaluation of Carcinogenic Risks to  
680 Human. [http://monographs.iarc.fr/ENG/Classification/latest\\_classif.php](http://monographs.iarc.fr/ENG/Classification/latest_classif.php). (Accessed on 13 December 2017)
- 681 Jia, C., Mao, X., Huang, T., Liang, X., Wang, Y., Shen, Y., Jiang, W., Wang, H., Bai, Z., Ma, M., Yu, Z., Ma, J., and  
682 Gao, H.: Non-methane hydrocarbons (NMHCs) and their contribution to ozone formation potential in a petrochemical  
683 industrialized city, Northwest China, *Atmospheric Research*, 169, 225-236, 10.1016/j.atmosres.2015.10.006, 2016.
- 684 Jin, X., and Holloway, T.: Spatial and temporal variability of ozone sensitivity over China observed from the Ozone  
685 Monitoring Instrument, *Journal of Geophysical Research: Atmospheres*, 120, 7229-7246, 10.1002/2015jd023250, 2015.
- 686 Jobson, B. T., Parrish, D. D., Goldan, P., Kuster, W., Fehsenfeld, F. C., Blake, D. R., Blake, N. J., and Niki, H.: Spatial  
687 and temporal variability of nonmethane hydrocarbon mixing ratios and their relation to photochemical lifetime, *Journal*  
688 *of Geophysical Research: Atmospheres*, 103, 13557-13567, 10.1029/97jd01715, 1998.
- 689 Jobson, B. T., Berkowitz, C. M., Kuster, W. C., Goldan, P. D., Williams, E. J., Fehsenfeld, F. C., Apel, E. C., Karl, T.,  
690 Lonneman, W. A., and Riemer, D.: Hydrocarbon source signatures in Houston, Texas: Influence of the petrochemical  
691 industry, *Journal of Geophysical Research*, 109, 10.1029/2004jd004887, 2004.
- 692 Langford, A. O., Senff, C. J., Alvarez, R. J., Banta, R. M., and Hardesty, R. M.: Long-range transport of ozone from the  
693 Los Angeles Basin: A case study, *Geophysical Research Letters*, 37, n/a-n/a, 10.1029/2010gl042507, 2010.
- 694 Lau, A. K., Yuan, Z., Yu, J. Z., and Louie, P. K.: Source apportionment of ambient volatile organic compounds in  
695 Hong Kong, *The Science of the total environment*, 408, 4138-4149, 10.1016/j.scitotenv.2010.05.025, 2010.
- 696 Li, B., Ho, S. S. H., Xue, Y., Huang, Y., Wang, L., Cheng, Y., Dai, W., Zhong, H., Cao, J., and Lee, S.:  
697 Characterizations of volatile organic compounds (VOCs) from vehicular emissions at roadside environment: The first  
698 comprehensive study in Northwestern China, *Atmospheric Environment*, 161, 1-12, 10.1016/j.atmosenv.2017.04.029,  
699 2017a.
- 700 Li, K., Chen, L., Ying, F., White, S. J., Jang, C., Wu, X., Gao, X., Hong, S., Shen, J., Azzi, M., and Cen, K.:  
701 Meteorological and chemical impacts on ozone formation: A case study in Hangzhou, China, *Atmospheric Research*,  
702 10.1016/j.atmosres.2017.06.003, 2017b.
- 703 Li, K., Li, J., Wang, W., Tong, S., Liggio, J., and Ge, M.: Evaluating the effectiveness of joint emission control policies  
704 on the reduction of ambient VOCs: Implications from observation during the 2014 APEC summit in suburban Beijing,  
705 *Atmospheric Environment*, 164, 117-127, 10.1016/j.atmosenv.2017.05.050, 2017c.
- 706 Li, L., and Wang, X.: Seasonal and diurnal variations of atmospheric non-methane hydrocarbons in Guangzhou, China,  
707 *International journal of environmental research and public health*, 9, 1859-1873, 10.3390/ijerph9051859, 2012.
- 708 Li, L., Chen, Y., Zeng, L., Shao, M., Xie, S., Chen, W., Lu, S., Wu, Y., and Cao, W.: Biomass burning contribution to  
709 ambient volatile organic compounds (VOCs) in the Chengdu–Chongqing Region (CCR), China, *Atmospheric*  
710 *Environment*, 99, 403-410, 10.1016/j.atmosenv.2014.09.067, 2014.
- 711 Li, Q., Zhang, L., Wang, T., Wang, Z., Fu, X., and Zhang, Q.: "New" Reactive Nitrogen Chemistry Reshapes the  
712 Relationship of Ozone to Its Precursors, *Environmental science & technology*, 52, 2810-2818, 10.1021/acs.est.7b05771,  
713 2018.
- 714 Lin, X., Traner, M., and Liu, S. C.: On the Nonlinearity of the Tropospheric Ozone Production, *Journal Of Geophysical*  
715 *Research*, 93, 15879-15888, 1998.
- 716 Liu, B., Liang, D., Yang, J., Dai, Q., Bi, X., Feng, Y., Yuan, J., Xiao, Z., Zhang, Y., and Xu, H.: Characterization and  
717 source apportionment of volatile organic compounds based on 1-year of observational data in Tianjin, China,  
718 *Environmental pollution*, 218, 757-769, 10.1016/j.envpol.2016.07.072, 2016a.
- 719 Liu, C., Zhang, C., Mu, Y., Liu, J., and Zhang, Y.: Emission of volatile organic compounds from domestic coal stove  
720 with the actual alternation of flaming and smoldering combustion processes, *Environmental Pollution*,  
721 10.1016/j.envpol.2016.11.089, 2016b.



- 722 Liu, C., Ma, Z., Mu, Y., Liu, J., Zhang, C., Zhang, Y., Liu, P., and Zhang, H.: The levels, variation characteristics, and  
723 sources of atmospheric non-methane hydrocarbon compounds during wintertime in Beijing, China, *Atmospheric*  
724 *Chemistry and Physics*, 17, 10633-10649, [10.5194/acp-17-10633-2017](https://doi.org/10.5194/acp-17-10633-2017), 2017.
- 725 Liu, H., Liu, S., Xue, B., Lv, Z., Meng, Z., Yang, X., Xue, T., Yu, Q., and He, K.: Ground-level ozone pollution and its  
726 health impacts in China, *Atmospheric Environment*, 173, 223-230, [10.1016/j.atmosenv.2017.11.014](https://doi.org/10.1016/j.atmosenv.2017.11.014), 2018.
- 727 Liu, Y., Shao, M., Fu, L., Lu, S., Zeng, L., and Tang, D.: Source profiles of volatile organic compounds (VOCs)  
728 measured in China: Part I, *Atmospheric Environment*, 42, 6247-6260, [10.1016/j.atmosenv.2008.01.070](https://doi.org/10.1016/j.atmosenv.2008.01.070), 2008a.
- 729 Liu, Y., Shao, M., Lu, S., Chang, C.-C., Wang, J.-L., and Fu, L.: Source apportionment of ambient volatile organic  
730 compounds in the Pearl River Delta, China: Part II, *Atmospheric Environment*, 42, 6261-6274,  
731 [10.1016/j.atmosenv.2008.02.027](https://doi.org/10.1016/j.atmosenv.2008.02.027), 2008b.
- 732 Liu, Y., Yuan, B., Li, X., Shao, M., Lu, S., Li, Y., Chang, C. C., Wang, Z., Hu, W., Huang, X., He, L., Zeng, L., Hu, M.,  
733 and Zhu, T.: Impact of pollution controls in Beijing on atmospheric oxygenated volatile organic compounds (OVOCs)  
734 during the 2008 Olympic Games: observation and modeling implications, *Atmospheric Chemistry and Physics*, 15,  
735 3045-3062, [10.5194/acp-15-3045-2015](https://doi.org/10.5194/acp-15-3045-2015), 2015.
- 736 Louie, P. K. K., Ho, J. W. K., Tsang, R. C. W., Blake, D. R., Lau, A. K. H., Yu, J. Z., Yuan, Z., Wang, X., Shao, M.,  
737 and Zhong, L.: VOCs and OVOCs distribution and control policy implications in Pearl River Delta region, China,  
738 *Atmospheric Environment*, 76, 125-135, [10.1016/j.atmosenv.2012.08.058](https://doi.org/10.1016/j.atmosenv.2012.08.058), 2013.
- 739 Luecken, D. J., Napelenok, S. L., Strum, M., Scheffe, R., and Phillips, S.: Sensitivity of Ambient Atmospheric  
740 Formaldehyde and Ozone to Precursor Species and Source Types Across the United States, *Environmental science &*  
741 *technology*, 52, 4668-4675, [10.1021/acs.est.7b05509](https://doi.org/10.1021/acs.est.7b05509), 2018.
- 742 Lyu, X. P., Chen, N., Guo, H., Zhang, W. H., Wang, N., Wang, Y., and Liu, M.: Ambient volatile organic compounds  
743 and their effect on ozone production in Wuhan, central China, *The Science of the total environment*, 541, 200-209,  
744 [10.1016/j.scitotenv.2015.09.093](https://doi.org/10.1016/j.scitotenv.2015.09.093), 2016.
- 745 Malley, C. S., Braban, C. F., Dumitrean, P., Cape, J. N., and Heal, M. R.: The impact of speciated VOCs on regional  
746 ozone increment derived from measurements at the UK EMEP supersites between 1999 and 2012, *Atmospheric*  
747 *Chemistry and Physics*, 15, 8361-8380, [10.5194/acp-15-8361-2015](https://doi.org/10.5194/acp-15-8361-2015), 2015.
- 748 McGaughey, G. R., Desai, N. R., Allen, D. T., Seila, R. L., Lonneman, W. A., Fraser, M. P., Harley, R. A., Pollack, A.  
749 K., Ivy, J. M., and Price, J. H.: Analysis of motor vehicle emissions in a Houston tunnel during the Texas Air Quality  
750 Study 2000, *Atmospheric Environment*, 38, 3363-3372, [10.1016/j.atmosenv.2004.03.006](https://doi.org/10.1016/j.atmosenv.2004.03.006), 2004.
- 751 Millet, D. B., Baasandorj, M., Hu, L., Mitroo, D., Turner, J., and Williams, B. J.: Nighttime Chemistry and Morning  
752 Isoprene Can Drive Urban Ozone Downwind of a Major Deciduous Forest, *Environmental science & technology*, 50,  
753 4335-4342, [10.1021/acs.est.5b06367](https://doi.org/10.1021/acs.est.5b06367), 2016.
- 754 Monod, A., Sive, B. C., Avino, P., Chen, T., Blake, D. R., and Rowland, F. S.: Monoaromatic compounds in ambient  
755 air of various cities: a focus on correlations between the xylenes and ethylbenzene, *Atmospheric Environment*, 35,  
756 135-149, 2001.
- 757 Na, K., Kim, Y. P., Moon, K.-C., Moon, I., and Fung, K.: Concentrations of volatile organic compounds in an industrial  
758 area of Korea, *Atmospheric Environment* 35, 2747-2756, 2001.
- 759 Nagashima, T., Sudo, K., Akimoto, H., Kurokawa, J., and Ohara, T.: Long-term change in the source contribution to  
760 surface ozone over Japan, *Atmospheric Chemistry and Physics*, 17, 8231-8246, [10.5194/acp-17-8231-2017](https://doi.org/10.5194/acp-17-8231-2017), 2017.
- 761 Ou, J., Zheng, J., Li, R., Huang, X., Zhong, Z., Zhong, L., and Lin, H.: Speciated OVOC and VOC emission inventories  
762 and their implications for reactivity-based ozone control strategy in the Pearl River Delta region, China, *The Science of*  
763 *the total environment*, 530-531, 393-402, [10.1016/j.scitotenv.2015.05.062](https://doi.org/10.1016/j.scitotenv.2015.05.062), 2015.



- 764 Ou, J., Yuan, Z., Zheng, J., Huang, Z., Shao, M., Li, Z., Huang, X., Guo, H., and Louie, P. K.: Ambient Ozone Control  
765 in a Photochemically Active Region: Short-Term Despiking or Long-Term Attainment?, *Environmental science &*  
766 *technology*, 50, 5720-5728, 10.1021/acs.est.6b00345, 2016.
- 767 Paatero, P., and Tapper, U.: Positive matrix factorization: a non-negative Factor model with optimal utilization of Error  
768 estimates of data values, *Environmetrics*, 5, 111-126, 1994.
- 769 Paatero, P.: Least squares formulation of robust non-negative factor analysis, *Chemometrics and Intelligent Laboratory*  
770 *Systems*, 37, 23–35, 1997.
- 771 Paatero, P.: User's Guide for positive Matrix Factorization programs PMF2 and PMF3, part 1-2: Tutorial, 19 -21.  
772 University of Helsinki, Helsinki, Finland, 2007.
- 773 Pal, S., Xueref-Remy, I., Ammoura, L., Chazette, P., Gibert, F., Royer, P., Dieudonné, E., Dupont, J. C., Haeffelin, M.,  
774 Lac, C., Lopez, M., Morille, Y., and Ravetta, F.: Spatio-temporal variability of the atmospheric boundary layer depth  
775 over the Paris agglomeration: An assessment of the impact of the urban heat island intensity, *Atmospheric Environment*,  
776 63, 261-275, 10.1016/j.atmosenv.2012.09.046, 2012.
- 777 Polissar, A. V., Hopke, P. K., Paatero, P., Malm, W. C., and Sisler, J. F.: Atmospheric aerosol over Alaska: 2.  
778 Elemental composition and sources, *Journal of Geophysical Research: Atmospheres*, 103, 19045-19057,  
779 10.1029/98jd01212, 1998.
- 780 Pollack, I. B., Ryerson, T. B., Trainer, M., Neuman, J. A., Roberts, J. M., and Parrish, D. D.: Trends in ozone, its  
781 precursors, and related secondary oxidation products in Los Angeles, California: A synthesis of measurements from  
782 1960 to 2010, *Journal of Geophysical Research: Atmospheres*, 118, 5893-5911, 10.1002/jgrd.50472, 2013.
- 783 Raysoni, A. U., Stock, T. H., Sarnat, J. A., Chavez, M. C., Sarnat, S. E., Montoya, T., Holguin, F., and Li, W. W.:  
784 Evaluation of VOC concentrations in indoor and outdoor microenvironments at near-road schools, *Environmental*  
785 *pollution*, 231, 681-693, 10.1016/j.envpol.2017.08.065, 2017.
- 786 Russo, R. S., Zhou, Y., White, M. L., Mao, H., Talbot, R., and Sive, B. C.: Multi-year (2004–2008) record of  
787 nonmethane hydrocarbons and halocarbons in New England: seasonal variations and regional sources, *Atmospheric*  
788 *Chemistry and Physics*, 10, 4909-4929, 10.5194/acp-10-4909-2010, 2010.
- 789 Sahu, L. K., Tripathi, N., and Yadav, R.: Contribution of biogenic and photochemical sources to ambient VOCs during  
790 winter to summer transition at a semi-arid urban site in India, *Environmental pollution*, 229, 595-606,  
791 10.1016/j.envpol.2017.06.091, 2017.
- 792 Shao, M., Lu, S., Liu, Y., Xie, X., Chang, C., Huang, S., and Chen, Z.: Volatile organic compounds measured in  
793 summer in Beijing and their role in ground-level ozone formation, *Journal of Geophysical Research*, 114,  
794 10.1029/2008jd010863, 2009.
- 795 Shao, M., Wang, B., Lu, S., Yuan, B., and Wang, M.: Effects of Beijing Olympics Control Measures on Reducing  
796 Reactive Hydrocarbon Species, *Environ. Sci. Technol.*, 45, 514-519, 2011.
- 797 Shao, P., An, J., Xin, J., Wu, F., Wang, J., Ji, D., and Wang, Y.: Source apportionment of VOCs and the contribution to  
798 photochemical ozone formation during summer in the typical industrial area in the Yangtze River Delta, China,  
799 *Atmospheric Research*, 176-177, 64-74, 10.1016/j.atmosres.2016.02.015, 2016.
- 800 Shen, F., Ge, X., Hu, J., Nie, D., Tian, L., and Chen, M.: Air pollution characteristics and health risks in Henan  
801 Province, China, *Environmental research*, 156, 625-634, 10.1016/j.envres.2017.04.026, 2017.
- 802 Simon, H., Reff, A., Wells, B., Xing, J., and Frank, N.: Ozone trends across the United States over a period of  
803 decreasing NO<sub>x</sub> and VOC emissions, *Environmental science & technology*, 49, 186-195, 10.1021/es504514z, 2015.
- 804 Streets, D. G., Fu, J. S., Jang, C. J., Hao, J., He, K., Tang, X., Zhang, Y., Wang, Z., Li, Z., Zhang, Q., Wang, L., Wang,  
805 B., and Yu, C.: Air quality during the 2008 Beijing Olympic Games, *Atmospheric Environment*, 41, 480-492,  
806 10.1016/j.atmosenv.2006.08.046, 2007.



- 807 Sun, J., Wang, Y., Wu, F., Tang, G., Wang, L., Wang, Y., and Yang, Y.: Vertical characteristics of VOCs in the lower  
808 troposphere over the North China Plain during pollution periods, *Environmental pollution*, 236, 907-915,  
809 10.1016/j.envpol.2017.10.051, 2018.
- 810 Tang, J. H., Chan, L. Y., Chan, C. Y., Li, Y. S., Chang, C. C., Liu, S. C., Wu, D., and Li, Y. D.: Characteristics and  
811 diurnal variations of NMHCs at urban, suburban, and rural sites in the Pearl River Delta and a remote site in South  
812 China, *Atmospheric Environment*, 41, 8620-8632, 10.1016/j.atmosenv.2007.07.029, 2007.
- 813 Toro, M. V., Cremades, L. V., and Calbo, J.: Relationship between VOC and NO<sub>x</sub> emissions and chemical production  
814 of tropospheric ozone in the Aburra Valley (Colombia), *Chemosphere*, 65, 881-888,  
815 10.1016/j.chemosphere.2006.03.013, 2006.
- 816 Tsai, S. M., Zhang, J. J., Smith, K. R., Ma, Y., Rasmussen, R. A., and Khalil, M. A. K.: Characterization of  
817 Non-methane Hydrocarbons Emitted from Various Cookstoves Used in China, *Environ. Sci. Technol.*, 37, 2869-2877,  
818 2003.
- 819 U.S.EPA: Revisions to the California state implementation plan and revision to the definition of volatile organic  
820 compounds (VOC): removal of VOC exemptions for California's aerosol coating products reactivity-based regulation,  
821 *Fed. Regist.* 70, 53930-53935, 2005.
- 822 US EPA: EPA Positive Matrix Factorization (PMF) 5.0 Fundamentals and User Guide,  
823 <http://www.epa.gov/heasd/documents/EPA.PMF.5.0.User.Guide.pdf>, 2014.
- 824 Wang, H.-l., Jing, S.-a., Lou, S.-r., Hu, Q.-y., Li, L., Tao, S.-k., Huang, C., Qiao, L.-p., and Chen, C.-h.: Volatile  
825 organic compounds (VOCs) source profiles of on-road vehicle emissions in China, *The Science of the total  
826 environment*, 607-608, 253-261, 10.1016/j.scitotenv.2017.07.001, 2017a.
- 827 Wang, H., Qiao, Y., Chen, C., Lu, J., Qiao, L., and Lou, S.: Source Profiles and Chemical Reactivity of Volatile  
828 Organic Compounds from Solvent Use in Shanghai, China, *Aerosol and Air Quality Research*,  
829 10.4209/aaqr.2013.03.0064, 2014.
- 830 Wang, H., Xiang, Z., Wang, L., Jing, S., Lou, S., Tao, S., Liu, J., Yu, M., Li, L., Lin, L., Chen, Y., Wiedensohler, A.,  
831 and Chen, C.: Emissions of volatile organic compounds (VOCs) from cooking and their speciation: A case study for  
832 Shanghai with implications for China, *The Science of the total environment*, 10.1016/j.scitotenv.2017.10.098, 2017b.
- 833 Wang, H. L., Chen, C. H., Wang, Q., Huang, C., Su, L. Y., Huang, H. Y., Lou, S. R., Zhou, M., Li, L., Qiao, L. P., and  
834 Wang, Y. H.: Chemical loss of volatile organic compounds and its impact on the source analysis through a two-year  
835 continuous measurement, *Atmospheric Environment*, 80, 488-498, 10.1016/j.atmosenv.2013.08.040, 2013a.
- 836 Wang, M., Shao, M., Lu, S.-H., Yang, Y.-D., and Chen, W.-T.: Evidence of coal combustion contribution to ambient  
837 VOCs during winter in Beijing, *Chinese Chemical Letters*, 24, 829-832, 10.1016/j.ccl.2013.05.029, 2013b.
- 838 Wang, M., Shao, M., Chen, W., Lu, S., Liu, Y., Yuan, B., Zhang, Q., Zhang, Q., Chang, C. C., Wang, B., Zeng, L., Hu,  
839 M., Yang, Y., and Li, Y.: Trends of non-methane hydrocarbons (NMHC) emissions in Beijing during 2002-2013,  
840 *Atmospheric Chemistry and Physics*, 15, 1489-1502, 10.5194/acp-15-1489-2015, 2015.
- 841 Wang, T., Xue, L., Brimblecombe, P., Lam, Y. F., Li, L., and Zhang, L.: Ozone pollution in China: A review of  
842 concentrations, meteorological influences, chemical precursors, and effects, *The Science of the total environment*, 575,  
843 1582-1596, 10.1016/j.scitotenv.2016.10.081, 2017c.
- 844 Wang, X.-m., Sheng, G.-y., Fu, J.-m., Chan, C.-y., Lee, S.-C., Chan, L. Y., and Wang, Z.-s.: Urban roadside aromatic  
845 hydrocarbons in three cities of the Pearl River Delta, People's Republic of China, *Atmospheric Environment*, 36, 5141-  
846 5148, 2002.
- 847 Wang, Y., Guo, H., Zou, S., Lyu, X., Ling, Z., Cheng, H., and Zeren, Y.: Surface O<sub>3</sub> photochemistry over the South  
848 China Sea: Application of a near-explicit chemical mechanism box model, *Environmental pollution*, 234, 155-166,  
849 10.1016/j.envpol.2017.11.001, 2018.



- 850 Wei, W., Cheng, S., Li, G., Wang, G., and Wang, H.: Characteristics of ozone and ozone precursors (VOCs and NO<sub>x</sub>)  
851 around a petroleum refinery in Beijing, China, *Journal of Environmental Sciences*, 26, 332-342,  
852 10.1016/s1001-0742(13)60412-x, 2014.
- 853 Wu, R., and Xie, S.: Spatial Distribution of Ozone Formation in China Derived from Emissions of Speciated Volatile  
854 Organic Compounds, *Environmental science & technology*, 51, 2574-2583, 10.1021/acs.est.6b03634, 2017.
- 855 Xue, Y., Ho, S. S. H., Huang, Y., Li, B., Wang, L., Dai, W., Cao, J., and Lee, S.: Source apportionment of VOCs and  
856 their impacts on surface ozone in an industry city of Baoji, Northwestern China, *Scientific Reports*, 7, 9979,  
857 10.1038/s41598-017-10631-4, 2017.
- 858 Yan, Y., Yang, C., Peng, L., Li, R., and Bai, H.: Emission characteristics of volatile organic compounds from coal-,  
859 coal gangue-, and biomass-fired power plants in China, *Atmospheric Environment*, 143, 261-269,  
860 10.1016/j.atmosenv.2016.08.052, 2016.
- 861 Yan, Y., Peng, L., Li, R., Li, Y., Li, L., and Bai, H.: Concentration, ozone formation potential and source analysis of  
862 volatile organic compounds (VOCs) in a thermal power station centralized area: A study in Shuozhou, China,  
863 *Environmental pollution*, 223, 295-304, 10.1016/j.envpol.2017.01.026, 2017.
- 864 Yuan, B., Shao, M., Lu, S., and Wang, B.: Source profiles of volatile organic compounds associated with solvent use in  
865 Beijing, China, *Atmospheric Environment*, 44, 1919-1926, 10.1016/j.atmosenv.2010.02.014, 2010.
- 866 Yuan, B., Hu, W. W., Shao, M., Wang, M., Chen, W. T., Lu, S. H., Zeng, L. M., and Hu, M.: VOC emissions,  
867 evolutions and contributions to SOA formation at a receptor site in eastern China, *Atmospheric Chemistry and Physics*,  
868 13, 8815-8832, 10.5194/acp-13-8815-2013, 2013a.
- 869 Yuan, Z., Lau, A. K. H., Shao, M., Louie, P. K. K., Liu, S. C., and Zhu, T.: Source analysis of volatile organic  
870 compounds by positive matrix factorization in urban and rural environments in Beijing, *Journal of Geophysical*  
871 *Research*, 114, 10.1029/2008jd011190, 2009.
- 872 Yuan, Z., Zhong, L., Lau, A. K. H., Yu, J. Z., and Louie, P. K. K.: Volatile organic compounds in the Pearl River Delta:  
873 Identification of source regions and recommendations for emission-oriented monitoring strategies, *Atmospheric*  
874 *Environment*, 76, 162-172, 10.1016/j.atmosenv.2012.11.034, 2013b.
- 875 Zhang, J., Sun, Y., Wu, F., Sun, J., and Wang, Y.: The characteristics, seasonal variation and source apportionment of  
876 VOCs at Gongga Mountain, China, *Atmospheric Environment*, 88, 297-305, 10.1016/j.atmosenv.2013.03.036, 2014.
- 877 Zhang, Z., Wang, X., Zhang, Y., Lu, S., Huang, Z., Huang, X., and Wang, Y.: Ambient air benzene at background sites  
878 in China's most developed coastal regions: exposure levels, source implications and health risks, *The Science of the*  
879 *total environment*, 511, 792-800, 10.1016/j.scitotenv.2015.01.003, 2015.
- 880 Zhao, Y., Nguyen, N. T., Presto, A. A., Hennigan, C. J., May, A. A., and Robinson, A. L.: Intermediate Volatility  
881 Organic Compound Emissions from On-Road Diesel Vehicles: Chemical Composition, Emission Factors, and  
882 Estimated Secondary Organic Aerosol Production, *Environmental science & technology*, 49, 11516-11526,  
883 10.1021/acs.est.5b02841, 2015.
- 884 Zheng, H., Kong, S., Xing, X., Mao, Y., Hu, T., Ding, Y., Li, G., Liu, D., Li, S., and Qi, S.: One year monitoring of  
885 volatile organic compounds (VOCs) from an oil-gas station in northwest China, *Atmospheric Chemistry and Physics*  
886 *Discussions*, 1-57, 10.5194/acp-2017-828, 2017.
- 887 Zhu, Y., Yang, L., Kawamura, K., Chen, J., Ono, K., Wang, X., Xue, L., and Wang, W.: Contributions and source  
888 identification of biogenic and anthropogenic hydrocarbons to secondary organic aerosols at Mt. Tai in 2014,  
889 *Environmental pollution*, 220, 863-872, 10.1016/j.envpol.2016.10.070, 2017.

890
