# Supplementary material for: Impact of VOCs on the formation of ozone in a central China city during severe pollution periods
Source: Copernicus journal article supplement (doi:10.5194/acp-2018-397), 2018-08-10
Supplement: Supplementary file [file Comment & response-RC1.pdf › comment & response-RC1/Comment & response-RC1.pdf]

## Comment and response

The authors thank for all valuable comments and suggestions to our manuscript. We have point-to-point response to each comment as below.

### Comment 1:

The title can also be changed, since the influence of VOCs on O<sub>3</sub> formation forms only a small part of the paper. The main focus of the paper is on the measured VOCs.

### Response:

Thanks for the suggestion, the title has been revised as:

*“Characterisation of VOCs and their related atmospheric processes in a central China city during severe pollution periods”*

### Comment 2:

I am not sure about the use of this acronym for the 57 VOCs. A VOC is a species and PAMS is not

### Response:

The term has been replaced by “VOCs”.

### Comment 3:

A high VOC/NO<sub>x</sub> ratio usually signifies that an area is NO<sub>x</sub> sensitive and not VOC sensitive. Changes in VOC concentration do therefore not cause any changes in O<sub>3</sub> concentrations, while increased NO<sub>x</sub> causes increased O<sub>3</sub>.

### Response:

According to the ratio of VOCs /NO<sub>x</sub>, the ozone formation regime was prone to VOC-limited. The statement has been revised accordingly.

### Comment 4:

Which four sites? Where you measured VOC precursor species? You mentioned that VOCs were measured in Zhengzhou City and precursor species were measured at four different sites

### Response:

This refers to the four sites located in Zhengzhou city where we collected the samples in this study. The details of sampling location have been described in the main texts.

### Comment 5:

A VOC-limited regime is associated with low VOCs not high VOCs. Your high VOC/NO<sub>x</sub> ratio indicate a NO<sub>x</sub> limited regime and therefore NO<sub>x</sub> must be reduced and not VOCs to reduce O<sub>3</sub>. However, I think this area is VOC-limited (very high NO<sub>x</sub>) and reduction on VOCs will result in reduced O<sub>3</sub>. And therefore your high VOC/NO<sub>x</sub> ratio does not make sense

**Response:**

Sorry for the unclear description in previous statement. Yes, it should be VOC-limited. The related statements have been revised.

**Comment 6:**

Fuel evaporation? Solvent evaporation, I agree with.

**Response:**

Solvent (i.e., from industry and household) is a major source of VOCs definitely, while fuel evaporation is also a contributor to VOCs originated from industries or other sources powered by fossil fuels.

**Comment 7:**

Where? In the USA or in China?

**Response:**

This refers to worldwide countries, including China and USA.

**Comment 8:**

This sentence read that the nationwide deterioration of air quality contributes the measurements being scarce. Please improve.

**Response:**

We have revised the sentence as

*“In China, investigations involving the source apportionment of VOCs, acquirement of emission profiles and interpretation of the seasonal variations were mainly concentrated in Yangtze River Delta (YRD), Pearl River Delta (PRD) and Beijing-Tianjin region (BJT) (An et al., 2014; Wang et al., 2014; Chen et al., 2014; Liu et al., 2016a; Guo et al., 2017), while studies in less developed or developing regions, such as southwestern and northwestern China, where contributions from the burning of biomass with high abundances of toxics and reactive compounds (such as, benzene) are prominent, are very limited. (Li et al., 2014; Li et al., 2017a).”*

66 **Comment 9:**

67 These sites are only in the USA

68 **Response:**

69 The term of PAMS was widely used to present the most critical contributors in the  
70 production of ozone in the atmosphere. It does not mean the sampling sites.

71 **Comment 10:**

72 This sentence does not fit within the context of this paragraph that is focusing on  
73 VOC measurement in China and the gaps in knowledge.

74 **Response:**

75 The original lines 64-66 have been deleted

76 **Comment 11:**

77 why? Due to VOCs/CO or NO<sub>x</sub>?

78 **Response:**

79 The statement has been revised as

80 *" the combustion of biomass had the highest contribution to O<sub>3</sub> formation*  
81 *potential (40% and 36%, respectively) due to high agricultural activities there "*

82 **Comment 12:**

83 The first two paragraphs are not well structure and must be improved.

84 **Response:**

85 The paragraphs have been revised, specified in newly lines 29-57.

86 **Comment 13:**

87 Why? Due to increased NO<sub>x</sub> emissions?

88 **Response:**

89 The sentence has been revised as:

90 *" The percentage of VOC-limited regime in North China Plain (NCP) has*  
91 *expanded from 4% to 6% during 2005-2013, because of the rapid increasing*  
92 *emissions of NO<sub>x</sub> "*

93 **Comment 14:**

please improve

**Response:**

The sentence has been revised as:

*“Based upon the density of population, industrial facilities, and the prevailing winds, four sites have been selected for sample collection”*

**Comment 15:**

If possible, it would be nice to show the major pollutant sources on the map in Fig. 1. This will help a lot with interpretation of results e.g. discussion in Section 1 on the influence of wind direction on the different  $\Sigma$ VOCs measured at each of the sites for all the months.

**Response:**

This is a good idea. Suggestion taken. The map was improved as below:

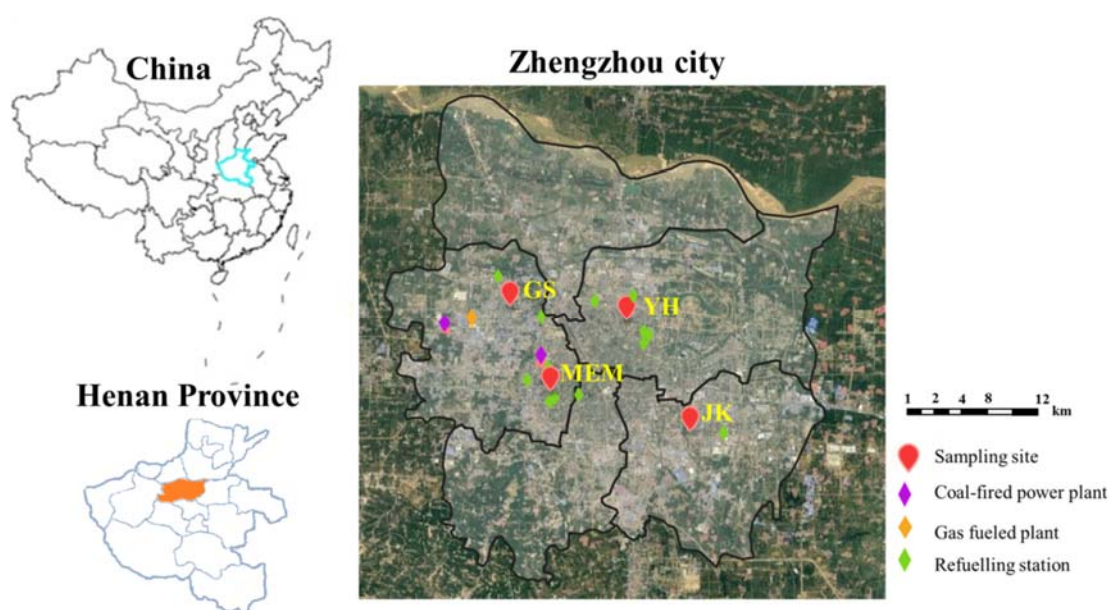

Fig 1. Map of Zhengzhou, China showing the locations of sampling sites.

**Comment 16:**

Please better explain. Why only 10 days? Were there only ten days in each month that it did not rain?

**Response:**

The sentence has been revised as:

*“Ten sampling days with the rainfall record (ca. 0 mm) were chosen in every month during the period of May - September, 2017 consequently, to represent a typical air quality conditions in a month”*

**Comment 17:**

What was considered to be valid samples?

**Response:**

“Valid samples” means that those samples were not influenced by high humidity, wrong operation, and fault of instrument.

**Comment 18:**

I do not think that this is a good acronym for your VOC species studied

**Response:**

Suggestion taken. The term has been replaced in the whole manuscript.

**Comment 19:**

According to what? Why were only these species considered relevant? Also, I assume from the rest of the discussion in the paper, these 57 species are only hydrocarbons. Therefore rather say that the 57 species included 28 were alkanes, 11 alkenes, acetylene and 17 aromatics.

**Response:**

The sentence has been revised as:

*“The standard gas named with PAMS (1 ppm; Spectra Gases Inc, NJ, USA) was used to build calibration curves, which containing 57 VOCs, including 28 alkanes, 11 alkenes, acetylene and 17 aromatics”*

**Comment 20:**

This sentence and table is not necessary in the document and can be removed. Although it could be included a supplementary material, I do not think these analytical specifications contribute to the main content of this paper.

**Response:**

Thanks for the suggestion. It has been moved to supporting information, depicted as Table S1.

**Comment 21:**

143 Uncertain what is meant here.

144 **Response:**

145 The statement has been revised as:

146 *“No obvious disturbances due to improperly activities (such as smoking, spray*  
147 *perfumes, etc.) of sample collectors were present during the sampling events”*

148 **Comment 22:**

149 Not sure that this is the correct term

150 **Response:**

151 The term has been was replaced by “QC/QA”.

152 **Comment 23:**

153 Unnecessary

154 **Response:**

155

156 It has been deleted

157

158 **Comment 24:**

159 Please improve the description of the PMF technique (line 166 - 184) Look at the  
160 paper Jaars, et al., Atmospheric Environment, 172 133–148, 2018,  
161 <http://dx.doi.org/10.1016/j.atmosenv.2017.10.047>.

162 **Response:**

163 Thanks for the reference. The description has been revised.

164

165 **Comment 25:**

166 Please structure this entire Section better. Numerous examples of incoherent writing is  
167 illustrated in the paragraphs in this section.)

168 **Response:**

169 The section has been revised.

170 **Comment 26:**

171 Air mass does not originate but pass over a source region/city/sources.

172 **Response:**

173 The statement has been revised as:

174 *“In May, the largest cluster (27.2%) was passed over from the origin city,*  
175 *Yinchuan”*

176 **Comment 27:**

177 It will be better here to say that the  $\Sigma$ VOCs different for all the months at all the sites,  
178 with the site with highest  $\Sigma$ VOCs not being the same each months. This can be  
179 attributed to numerous factors that will be explored later in the paper. And then you  
180 can present the influence of prevalent wind direction on concentrations measured.

181 **Response:**

182 The related section has been revised according to the suggestion, specified in newly  
183 lines 169-175.

184 **Comment 28:**

185 This discussion on the influence of prevailing wind direction and -speed could be  
186 significantly improved with an appropriate wind rose overlayed on a map of the city  
187 indicating the four sites and the major sources.

188 **Response:**

189 They have been presented in Fig. 6 and Fig S2.

190 **Comment 29:**

191 Can you indicate this on a topographical map of the city?

192 **Response:**

193 A reference contained the topographical map has been added.

194 *“Mu, B., Mayer, A. L., He, R., and Tian, G.: Land use dynamics and policy*  
195 *implications in Central China: A case study of Zhengzhou, Cities, 58, 39-49,*  
196 *10.1016/j.cities.2016.05.012, 2016.”*

197 **Comment 30:**

198 from where

199 **Response:**

200 The statement has been removed because of the adjustment of Table 2 and Fig. 10:

201 **Comment 31:**

202 A figure with meteorological data for the sampling period must be included to assist  
203 in the discussion of the data.

204 **Response:**

205 The statement has been removed because of the adjustment of Table 2 and Fig. 10,  
206 and the meteorological data was presented in Fig S1.

207 **Comment 32:**

208 The authors must consider to rather include a figure with the statistical distributions  
209 (e.g. box and whisker plots with mean, median, as well as 25th, 75th percentiles) of  
210 the VOC species presented for the entire sampling period instead of the large Table 3.  
211 This will greatly assist in the discussion of concentrations measured at different sites.  
212 Table 3 could then only include the  $\Sigma$ VOC for each month at each of the site if they  
213 want to elaborate on the influence of wind direction and -speed on VOC  
214 concentrations measured at each site.

215 **Response:** Thanks for the suggestion, Fig.10 has been added.



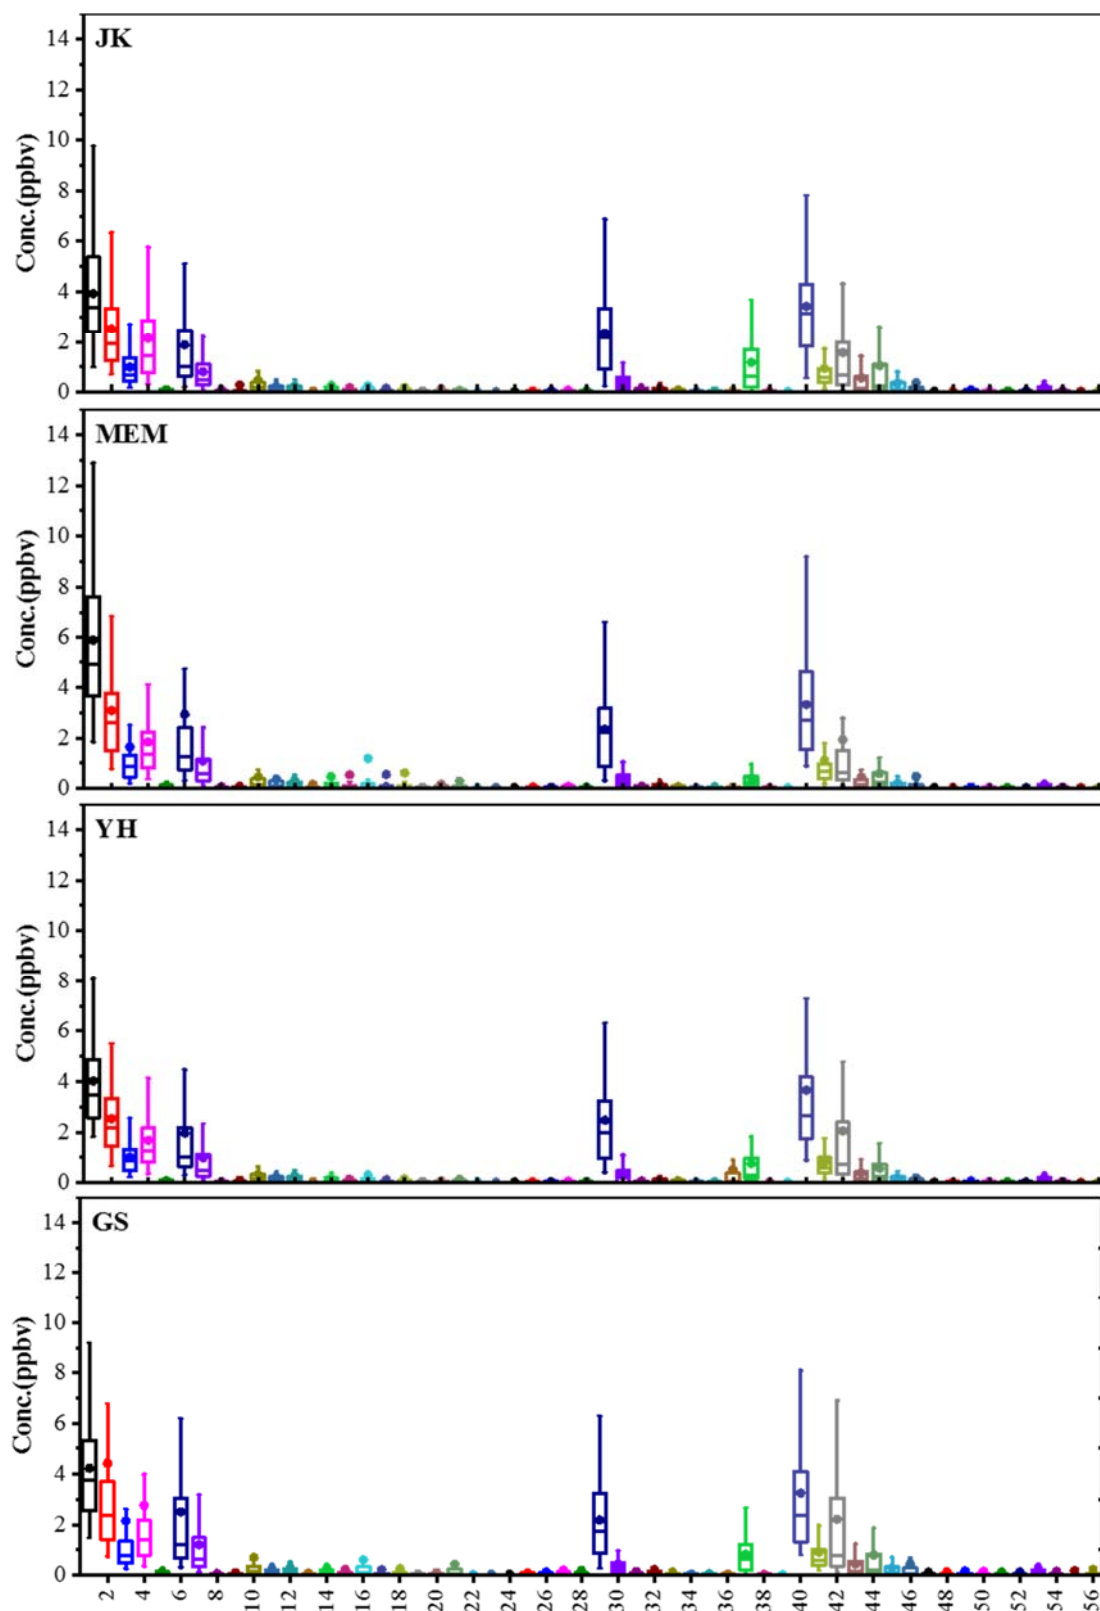

Fig.10 concentration level of 57 VOCs at each site for the whole sampling period, the whisker was ranged from 5-95%, and the box was 25-75%, the solid points stand for average value, the line in the box represent median value. The number of chemicals can refer from Table S1.

**Comment 33:**

Nowhere in the text it is indicated that these 57 VOCs were classified into alkane, alkenes, alkynes and aromatics, which are further discussed

**Response:**

The statement has been revised as

*“The standard gas named with PAMS (1 ppm; Spectra Gases Inc, NJ, USA) was used to build calibration curves, which containing 57 VOCs, including 28 alkanes, 11 alkenes, acetylene and 17 aromatics.”*

**Comment 34**

why is this?

**Response:**

It was attributed to the busy traffic in urban city. The sentence was revised as

*" Among the four major organic classes, alkane was the most abundant group as a result of busy traffic in urban city and its longevity "*

**Comment 35:**

Which will be nicely indicated in figure as suggested above presenting the statistical data of all VOCs measured at all the sites.

**Response:**

Suggestion taken. It has been presented in Fig.S3.

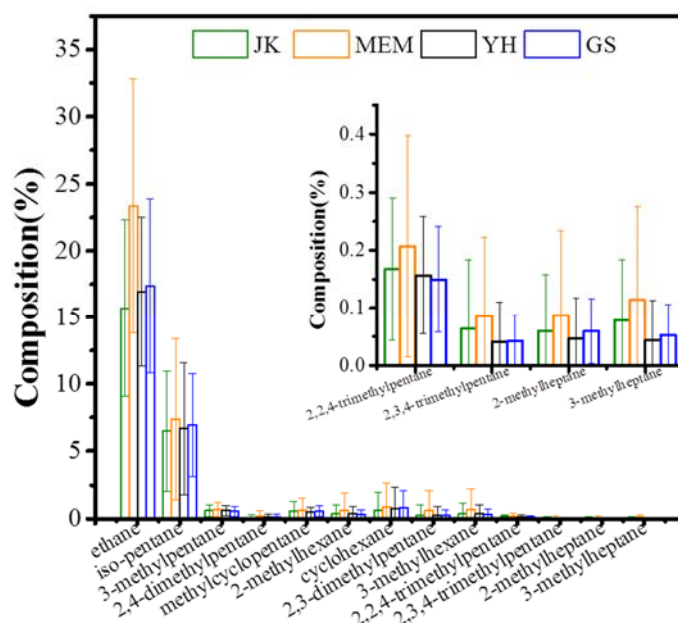

Fig. S3 Compositions of ethane, iso-pentane and C7-C8 alkanes at JK, MEM, YH and GS.

**Comment 36:**

What compounds? Alkanes in general, or the species contributing to alkane levels at MEM only? If the latter, why not elaborate on alkanes at the other sites?

**Response:**

They referred to ethane, isopentane and alkanes with 7-8 carbon atoms, which have been presented in Fig.S3.

**Comment 37**

missing an introductory sentence on the daytime and night-time concentration that is additionally presented in figure2

**Response:**

The typo has been corrected.

**Comment 38**

how so?

**Response:**

The statement has been revised as

*“the increases in alkene compositions (about 4. 3% uplift) were mainly due to higher contributions of isoprene (about 1.4% at morning and 7.6% in the afternoon), which was mainly emitted from biogenic sources and increased exponentially with temperature.*

**Comment 39:** Please include a table where in these VOC results can be contextualized and compared to other cities. Only Beijing, Nanjing and Guangzhou included in Figure 2. Furthermore, the fact that concentrations for these three cities are included in Fig.2 are also not properly introduced in the text.

**Response:**

The information has been added in revised Table 3.

**Comment 40:**

Are you speaking generally here, i.e. all the cities in China?

274 **Response:**

275 It refers to the countries discussed here.

276 **Comment 41**

277 Here again you mention aromatics. An examples of a sentence "coming from  
278 nowhere" within the context of a paragraph that is trying to contextualize results.

279 **Response:**

280 The statement has been revised as

281 *“With regard to the weight percentage of major groups (Table 3), the*  
282 *composition of alkanes was the largest in all cities because of their long-lives and*  
283 *widespread sources (Fig. 7), while the composition of aromatics was lower than*  
284 *alkenes in these cities except for Guangzhou”*

285 **Comment 42:**

286 You are only comparing your results to the three cities included in Fig. 2 and not all  
287 the cities listed here in your discussion above

288 **Response:**

289 The results have been shown in Table 3.

290 **Comment 43:**

291 Reference of biofuel as source of acetylene

292 **Response:**

293 A reference has been added.

294 *“Zhu, Y., Yang, L., Chen, J., Wang, X., Xue, L., Sui, X., Wen, L., Xu, C., Yao, L.,*  
295 *Zhang, J., Shao, M., Lu, S., and Wang, W.: Characteristics of ambient volatile*  
296 *organic compounds and the influence of biomass burning at a rural site in*  
297 *Northern China during summer 2013, Atmospheric Environment, 124, 156-165,*  
298 *10.1016/j.atmosenv.2015.08.097, 2016.”*

299 **Comment 44:**

300 The problem with the dataset is that it does not cover a full year, i.e. all seasons.  
301 Therefore rather combine local (wind direction and -speed as done in Section 3.1) and  
302 long-range transport (back trajectories as done in Section 3.7) here to explain  
303 temporal variation.

304 **Response:**

305 Suggestion taken.

306 **Comment 45:**

307 better to have meteorological parameters in separate fig as indicated in previous  
308 comment.

309 **Response:**

310 It has been presented in Fig S1

311 **Comment 46:**

312 Are you sure it is for all pollutants?

313 **Response:**

314 It refers to air pollutants we monitored in this study, including SO<sub>2</sub>, CO, NO<sub>2</sub>, O<sub>3</sub> and  
315 VOCs. We have revised the statement as

316 *“The results showed a distinctive temporal characteristic where lower levels of*  
317 *SO<sub>2</sub>, CO, NO<sub>x</sub>, O<sub>3</sub> and  $\Sigma$ VOCs were observed in July and August (mid-summer)”*

318 **Comment 47**

319 You did not collect VOCs on rainy days as indicated in your experimental section.

320 **Response:**

321 Yes, this observation was referred to the results from other studies.

322 **Comment 48:**

323 This is very difficult to see in Fig. 3. Fig. 3 must be improved to be more legible and  
324 easier to observe observations

325 **Response:**

326 It has been changed to newly Fig 8.

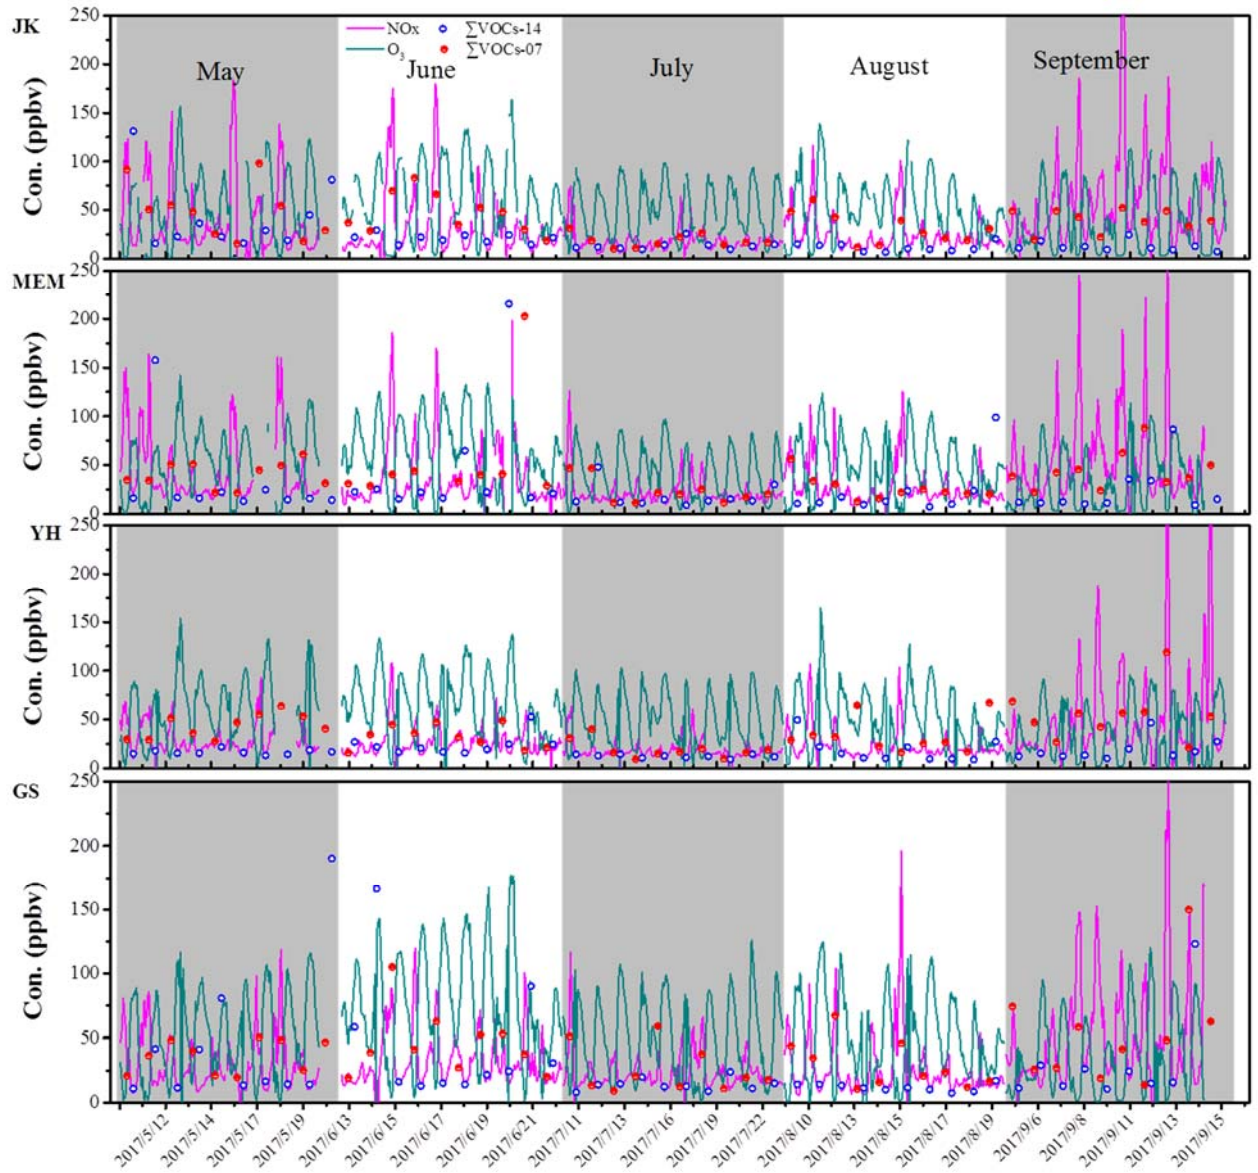

Fig. 8 Temporal variations of mixing ratios of  $\Sigma \text{VOCs}$ ,  $\text{NOx}$  and  $\text{O}_3$  at the four sites during the whole sampling period, in which  $\Sigma \text{VOCs-07}$  stands for the concentration level of  $\Sigma \text{VOCs}$  observed at 07:00 LT, and  $\Sigma \text{VOCs-14}$  was that observed at 14:00 LT.

**Comment 49:**

I cannot see this in Fig. 3

**Response:**

We have presented it in newly Fig. 9.

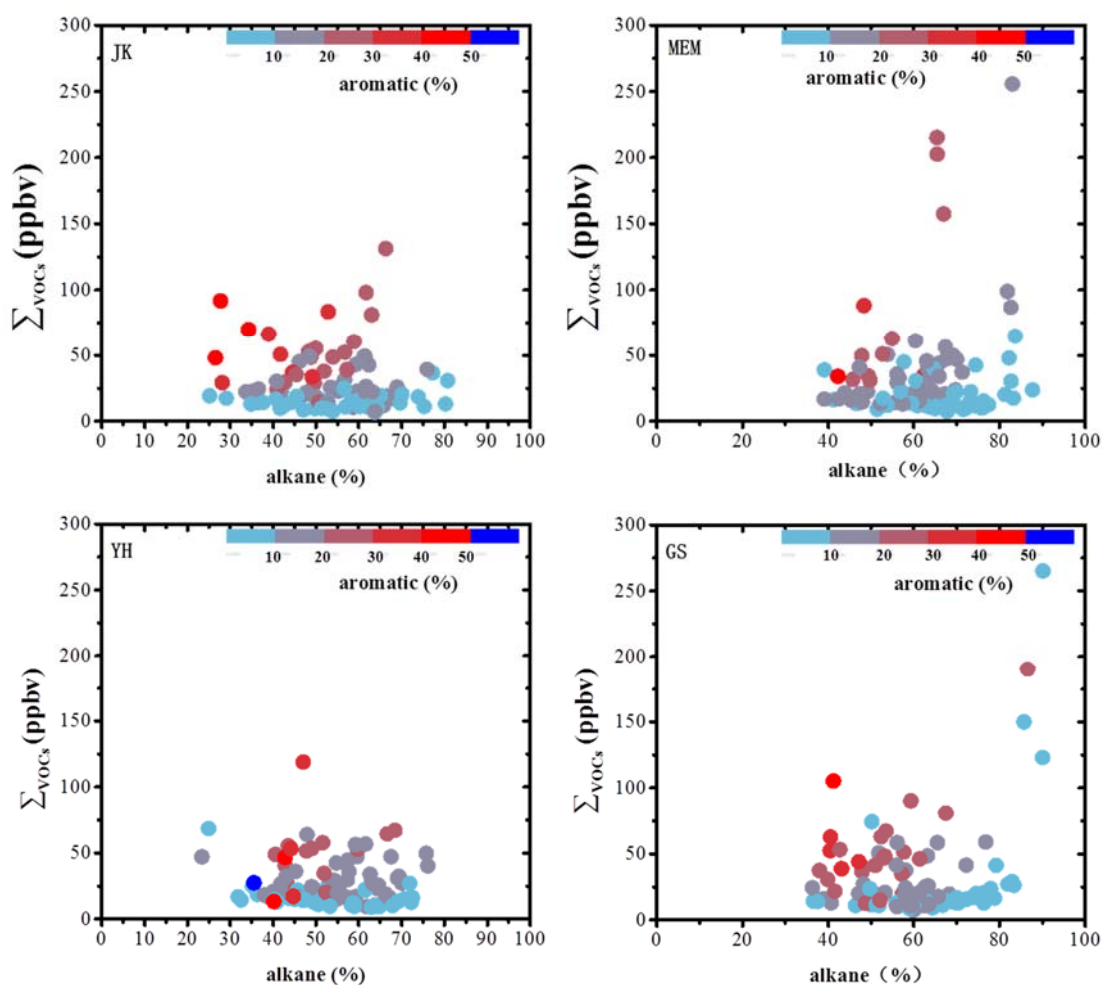

Fig. 9 The relationship between mixing ratio of  $\Sigma \text{VOCs}$  and the composition of alkane, the data points were color coded with the composition of aromatic.

**Comment 50:**

Not easily observed in Fig.3

**Response:**

We have modified the figure and presented in newly Fig. 9.

**Comment 51:**

Why? Can you show this?

**Response:**

The simultaneous increases in concentration of  $\text{SO}_2$ , CO and  $\text{NO}_x$  represent the characters of potential combustion source, which could be caused by the nearby thermal power plant.

**Comment 52:**

350 (Reason for disturbance?

351 **Response:**

352 During the sampling period, the building where we conducted the sampling had  
353 painting activities during June, 2017.

354 **Comment 53:**

355 Wind direction will confirm this

356 **Response:**

357 The wind direction was added as:

358 *"indicating the possible impact from a gas-fueled power plants located about 1*  
359 *km southwest of the site (about 18% was western wind at GS during May to*  
360 *September)"*

361 **Comment 54:**

362 Combine with next paragraph

363 **Response:**

364 We think it is not so appropriate to combine the two paragraphs. The discussion of  
365 next paragraph is on alkyne.

366 **Comment 55:**

367 Give a reference for acetylene associated with biomass burning.

368 **Response:**

369 *A reference of Zhu et al, 2016 has been added.*

370 *"Zhu, Y., Yang, L., Chen, J., Wang, X., Xue, L., Sui, X., Wen, L., Xu, C., Yao, L.,*  
371 *Zhang, J., Shao, M., Lu, S., and Wang, W.: Characteristics of ambient volatile*  
372 *organic compounds and the influence of biomass burning at a rural site in*  
373 *Northern China during summer 2013, Atmospheric Environment, 124, 156-165,*  
374 *10.1016/j.atmosenv.2015.08.097, 2016."*

375 **Comment 56:**

376 Instead of Table 4, rather presented a figure with statistical distributions of total  
377 VOCs, SO<sub>2</sub>, O<sub>3</sub> etc measured at each site. This will greatly assist in discussion.  
378 Paragraph in Section 3.1 where different monthly total VOC concentrations at each of  
379 the sites are explained with the influence of wind direction and -speed will also better



fit within the discussion on spatial variations. The structure of this section must also be improved.

**Response:**

The original table has been replaced by Fig. 11.

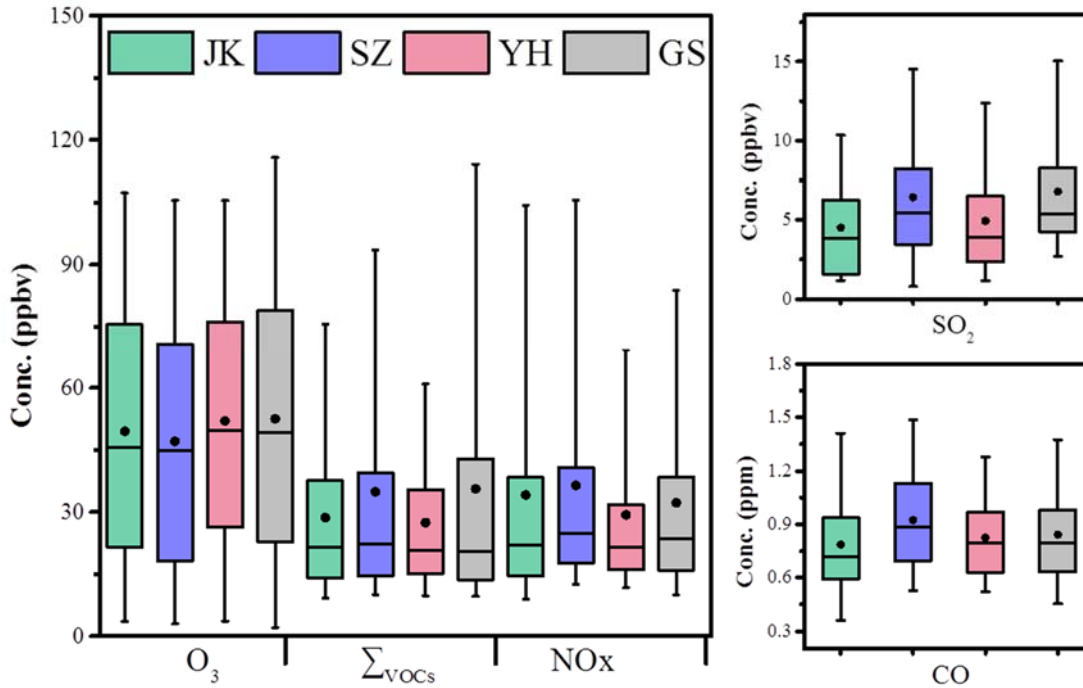

Fig. 11 The distribution of concentration point on O<sub>3</sub>, ΣVOCs, NO<sub>x</sub>, SO<sub>2</sub> and CO at each site, the range of the box was 25%-75%, the black line in the box stands for median level, the black dot represents the average level, the rang of whisker was 5-95%.

While the paragraph in Section 3.1 was more focus on meteorological factors, so it has not been moved to this section

**Comment 57:**

Not really. Differences are marginal

**Response:**

Yes, we agree that the difference is marginal. However, it is true that GS and JK had higher absolute values, so we have changed it to “*slightly higher*” in the text.

**Comment 58:**

This is not true. Differences are marginal

**Response:**

399 Yes, the difference is marginal. We have thus changed to

400 *“SO<sub>2</sub> and CO were more abundant, though marginal, in western area of*  
401 *Zhengzhou (GS and MEM)”.*

402 **Comment 59:**

403 Again, marginal differences between sites

404 **Response:**

405 The sentence has been rewritten as

406 *“With high VOCs and sufficient NO<sub>x</sub>, the highest average mixing ratio of O<sub>3</sub> was*  
407 *observed at GS, followed by YH site even with the lowest VOCs and NO<sub>x</sub>,*  
408 *indicating there are many other factors, in addition to the absolute concentrations*  
409 *of VOCs and NO<sub>x</sub>, which contribute to ozone formation at YH.”*

410 **Comment 60:**

411 Inconsequential statement from observation

412 **Response:**

413 The point has been deleted

414 **Comment 61:**

415 This sentence does not fit within the flow of the content

416 **Response:**

417 For in June, the O<sub>3</sub> concentration often exceeded the national standard level of 80  
418 ppbv, meaning severe air pollution caused by ozone during this period, in this section  
419 we focus on the period to discuss the relationship between VOCs and O<sub>3</sub> as a result.

420 **Comment 62:**

421 Small differences. Cannot really make this statement.

422 **Response:**

423 We do agree this. The sentence has been thus rewritten as

424 *"The higher level of O<sub>3</sub> at GS is accompanied with a higher  $\Sigma_{VOCs}$*   
425 *(39.29±25.37ppbv). The weight percentage of aromatics (15.62±12.06%) with*  
426 *high reactivity at GS was higher than those at other sites as well, indicating the*  
427 *painting and other renovation activities at GS in June may be an important factor*  
428 *for its high ozone level.”*

429 **Comment 63:**

430 How is this substantiated?

431 **Response:**

432 Solvent usage is an important source of aromatics. Considering the renovation activity  
433 in June at GS, the higher aromatic composition should be caused by the renovation.  
434 According to aromatics with high reactivity, we thus suspect that the higher ozone  
435 level in June at GS was associated with the renovation activity

436 **Comment 64:**

437 O<sub>3</sub> levels were only higher at GS

438 **Response:**

439 Thank for the pointing out this. The statement has been revised as:

440 *"The higher level of O<sub>3</sub> at GS is accompanied with a higher  $\Sigma_{VOCs}$*   
441 *(39.29±25.37ppbv) "*

442 **Comment 65:**

443 Bad writing

444 **Response:**

445 The statement has been revised as:

446 *" Even though both the  $\Sigma_{VOCs}$  and specifically O<sub>3</sub> formation potential compounds*  
447 *(such as, alkenes and aromatics) at MEM were slightly higher than those at YH*  
448 *(Table 5), the O<sub>3</sub> concentration at MEM was not higher than YH,"*

449 **Comment 66:**

450 O<sub>3</sub> can only be formed from NO<sub>2</sub>.

451 **Response:**

452 We certainly recognize this. However, NO<sub>2</sub> was formed from NO, and NO could  
453 consume O<sub>3</sub>. Considering that ozone formation involved all the process mentioned  
454 above, we do think it is reasonable to address the NO<sub>x</sub> impact on ozone formation.

455 **Comment 67:**

456 In China? Give a reference please. Where is Hebei located in relation to Beijing?  
457 Sentences 311 - 315 another example of incoherent writing.

458 **Response:**

459 The statement has been revised as:

460 *"It is well known that many O<sub>3</sub> episodes were attributable not only to local*  
461 *sources but also to regional transports. For example, Streets et al. (2007)*  
462 *reported that during continuous southern wind, the ozone level in Beijing was*  
463 *20-30% contributed by its neighboring city Hebei. "*

464 **Comment 68:**

465 From Fig. 3 this surely does not look like the day on which O<sub>3</sub> peaks at all the sites in  
466 this study.

467 **Response:**

468 Yes, it is only happened at YH, and the content was revised accordingly in the text.

469 **Comment 69:**

470 VOCs are the important contributors to O<sub>3</sub> formation within a VOC-limited regime,  
471 i.e. very high NO<sub>x</sub>. I am sure that this is the case for the very polluted regions in  
472 China.

473 **Response:**

474 Thank you for the reminder. The evidence has been added as

475 *"On that day, the ratios of VOCs /NO<sub>x</sub> at the four sites were all less than 6.5*  
476 *(ppbC/ppbv) (Fig. S4), indicating a regional VOC-control system, and that VOCs*  
477 *are the critical contributors to the formation of O<sub>3</sub> in Zhengzhou"*

478 **Comment 70:**

479 Fig. 4 is poorly introduced in the text and not sufficiently discussed.

480 **Response:**

481 The statement has rewritten as

482 *"while the reduction of  $\Sigma$ VOCs and active compounds (i.e., aromatic+alkene) at*  
483 *14:00 relative to 07:00, determined as 35% and 56% respectively, were the least*  
484 *at YH among the four sites"*

485 **Comment 71:**

486 You refer to aging in air masses.

487 **Response:**

488 Yes, this can be confirmed with its high E/X ratio (0.91) at 14:00, while the ratio for  
489 fresh air usually scattered around 0.3.

490 **Comment 72:**

491 Therefore VOC-limited due to very high NO<sub>x</sub>

492 **Response:**

493 Yes, it is.

494 **Comment 73:**

495 The construction in this section must also be improved. The authors interchange  
496 between T/B ratios and T/B correlations, which are two totally different aspects. Both  
497 are indicative of source, but in different manner. T/B ratios can be related to source  
498 and aging.

499 This section also links to your source apportionment section.

500 **Response:**

501 Yes, it is exactly right. The original text may be obscure. The explanation has been  
502 improved as below:

503 *"In this study, the  $R^2$  value for the correlation between benzene and toluene was*  
504 *better in May (0.73 - 0.84) than during other months for all sites (Fig. 15),*  
505 *indicating the source of benzene and toluene in May was more similar, and the*  
506 *average ratio in May varied within the range of 1.81 - 3.36 for all four sites,*  
507 *suggesting that evident impacts were observed from vehicle emissions on the*  
508 *VOCs during this period."*

509 **Comment 74:**

510 Poorly written sentence

511 **Response:**

512 The statement has been rewritten as

513 *"For each site, the T/B ratio was scattered in different ranges, suggesting*  
514 *spatio-temporally varied emission sources (Fig. 15 and Fig.S5)"*

515 **Comment 75:**

516 Increased regionally in view of temporal variations?? This deduction does not make  
517 sense.

518 **Response:**

519 The statement has been revised as

520 *" In addition, the atmospheric lifetimes of toluene and benzene are different, it*  
521 *was reported that when the •OH concentration was assumed to be 106 rad cm-3*  
522 *(Monod et al., 2001), the lifetime for toluene and benzene was 1.9 days and 9.4*  
523 *days, respectively, which maybe one of factors for the lower T/B ratios at 14:00*  
524 *LT than those at 07:00 LT, and higher T/B ratios in September.."*

525 **Comment 76:**

526 Please do not confuse T/B ratio and T/B correlations here. T/B correlation is  
527 indicative of similar sources, while T/B ratio indicate sources and aging.

528 What does this mean/imply?

529 **Response:**

530 We agree with this point. The statement has been revised as

531 *"The R<sup>2</sup> value for the correlation between benzene and toluene was better in May*  
532 *(0.73 - 0.84) than during other months for all sites, indicating the source of*  
533 *benzene and toluene in May was more similar"*

534 **Comment 77:**

535 One would start/begin the paragraph with these sentences to indicate to what sources  
536 specific ratios of these two compounds can be related to and then you discuss your  
537 observed ratios in your study and relate them to these typical ratios. Another example  
538 of incoherent writing.

539 **Response:**

540 Newly lines 402-407 have been revised accordingly.

541 **Comment 78:**

542 Toluene is an aromatic species and NOT an alkene.

543 **Response:**

544 Yes, we truly know this. The original statement may lead confusion and it has been  
545 revised as

546 *"As to individual species, the 10 most biggest contributors included ethylene,*  
547 *isoprene, m,p-xylene, toluene, propylene, acetylene, n-butane, i-pentane and*  
548 *propane"*

**Comment 79:**

What type of combustion? This paragraph is poorly structured and must be improved.

**Response:**

Based on analysis conducted in other sections, we inferred the combustion source as vehicle emissions and biofuel burning. and the paragraph was restructured.

**Comment 80:**

The VOC/NO<sub>x</sub> ratio is used to establish whether a region is VOC or NO<sub>x</sub> limited.

Here you must indicate whether VOCs or NO<sub>x</sub> are the limiting factors.

High VOC/NO<sub>x</sub> ratio indicative of region being NO<sub>x</sub> limited. In such a region NO<sub>x</sub> determine O<sub>3</sub> levels and not VOCs. Higher ratios only indicate high VOCs in relation to NO<sub>x</sub>. If there is not enough NO<sub>x</sub>, O<sub>3</sub> will not form, since it can only form from NO<sub>2</sub>. Therefore to say that higher O<sub>3</sub> correspond to higher VOC/NO<sub>x</sub> ratios does not make sense. More VOCs in the absence of NO<sub>x</sub> will not form O<sub>3</sub>. Therefore, I think at your site you have high NO<sub>x</sub>, which is the only scenario where O<sub>3</sub> formation is considered VOC sensitive.

**Response:**

We have added a new section 3.4, which is mainly discussed the variation of VOCs/NO<sub>x</sub> ratios.

*“The VOCs/NO<sub>x</sub> ratio is usually used to establish whether a region is VOCs or NO<sub>x</sub> limited in ozone formation. In this study, the mean level of VOCs /NO<sub>x</sub> (ppbC/ppbv) were below 5 at all four sites (Fig.12), and 75% data points were less than 6 at each site, indicating that the ozone formation were controlled by VOCs in Zhengzhou, and the reductions on the emissions of VOCs will be benefit for ozone alleviation.*

*The specific data distribution of VOCs /NO<sub>x</sub> showed some differences in the four sites (Fig. 12), with the lowest value presented at MEM (about 3.8), and the highest value observed at JK (about 4.7), demonstrating that due to the impact of thermal-power plant, the production of ozone at MEM was more sensitive to VOCs than JK. Meanwhile, about 14% of the VOCs /NO<sub>x</sub> ratios (>8.0) were located in the NO<sub>x</sub>-limited area at JK, which may be a result of its higher VOCs or lower NO<sub>x</sub> emissions than other sites. Both the statistical data and the mixing ratios showed higher levels of VOCs (with lower NO<sub>x</sub>) at GS, where only 4% of the ratios larger than 8 has been observed, indicating that there must be some*

*other factors (unknown in this study) impact the variation of ozone formation regimes.*

*As to the daily variation of VOCs /NOx ratios (Fig. 12), higher values at 14:00 relative to 07:00 were observed at the four sites, which may be correlated with less vehicle emissions or more consumption path of NOx at noon time. The increment of VOCs /NOx at 14:00 relative to 07:00 was more obvious at JK and GS, showing more emission sources of VOCs at these two sites at daytime, and resulting the ozone formation system at JK and GS shifting to the transition area in the afternoon.*

*Researches have shown that ozone formation depends not only on its precursors (mainly VOCs and NOx), but also has VOCs /NOx ratios (Ilana B. Pollack, 2013). In our research, the mixing ratio of O3 at 14:00 LT presented a small positive trend ( $p < 0.05$ ) with the uplift of VOCs /NOx at JK (Fig. 13), which was similar to the results observed at Shanghai (Gao et al, 2017), where the O3 formation was more sensitive to NOx concentration under high O3 levels. This may be a result of the increased ozone production efficiency at high VOCs /NOx. There were no discernible trends at other sites, possibly due to the counteraction imposed by other uncertain factors.”*

**Comment 81:**

Similar to all other sections, this section can also be better written and structured (section 3.7).

**Response:**

This section has been re-structured in other parts.

**Comment 82:**

This section must also be improved. I also suggest to combine this with Section 3.1 where differences in VOC concentrations for different months are discussed and explained with wind direction and -speed. Therefore combine local and long-range transport. Also see general comment at Section 3.1 to include all this in Section 3.2.

**Response:**

It has been incorporated in section 3.1 and 3.2

**Comment 83:**

Very busy figure with too much information.

**Response:**



615 Suggestion taken. The original figures have been decomposed as Fig.15 and Fig.S5.

616 **Comment 84:**

617 Please describe this better. All the figures are small. You mean "smaller" figures.

618 ***Response:***

619 Thanks for the reminder. The vertical axis in every small figure represents the mixing  
620 ratio of toluene (ppbv), while the horizontal axis stands for benzene level (ppbv).

621
