# Supplementary material for: Impact of VOCs on the formation of ozone in a central China city during severe pollution periods
Source: Copernicus journal article supplement (doi:10.5194/acp-2018-397), 2018-08-10
Supplement: Supplementary file [file suprporting information.pdf › comment & response-RC1/suprporting information.pdf]

## Supporting information

### Quality control and quality assurance (QC/QA)

In order to alleviate contamination from previous samples, canisters had to be repeatedly cleaned using humidified zero air before sampling. In order to inspect the cleanliness and vacuum in canisters, the pre-cleaned canisters, after storing for 24 h, were analyzed using GC-MS according to the same analytical procedures used to analyze the field samples. The canisters without any contamination were used for sampling. No obvious disturbances due to improperly activities (such as smoking, spray fumes, etc.) of sample collectors were present during the sampling events. Daily calibration of the GC-MSD/FID was performed using 2 ppbv standard mixtures to ensure the consistency and sensitivity of the system. The deviation in standard values was within  $\pm 20\%$ . Abnormal QC/QA data with extremely high or low responses was recalibrated until the deviation was within the acceptable range.

### PMF model

In brief, PMF is a diagnostic method involving multivariate analysis, and involves decomposing the integrated sample data (VOCs in this study) into two matrices, namely the source profiles and the source contributions (Jaars et al., 2018). The method takes advantage of other observation data, such as wind direction and speed. Detailed information on the application of PMF can be referred to the publications cited above and to the PMF 5.0 user manual (U.S. EPA, 2014).

Based on the chemical mass balance between the input concentrations of VOCs and the chemical profiles, PMF regarded the ambient data  $x_{ij}$ , namely the concentration of  $j^{\text{th}}$  constituent in  $i^{\text{th}}$  sample, as the gross values contributed by  $p$  sources according to Eq. (1).

$$X_{ij} = \sum_{k=1}^p g_{ik} f_{kj} + e_{ij} \quad (1)$$

where  $g_{ik}$  stands for the contribution of  $k^{\text{th}}$  factor in the  $i^{\text{th}}$  sample, while  $f_{kj}$  is the load of  $j^{\text{th}}$  compound in the  $k^{\text{th}}$  source and the  $e_{ij}$  is the relevant residual.

In order to avoid negative source contributions, a penalty function was adopted

for constraints. Each data point can be individually weighed in the model, while the samples with lots of missing values were excluded.

Based on the algorithm for uncertainties (U), expressed as  $Q$  values, the stability of running results was assessed according to Eq. (2).

$$Q = \sum_{i=1}^n \sum_{j=1}^m \left[ \frac{X_{ij} - \sum_{k=1}^p g_{ik} f_{kj}}{u_{ij}} \right]^2 \quad (2)$$

where  $u_{ij}$  stands for the uncertainty of the  $j^{\text{th}}$  compound in  $i^{\text{th}}$  sample.

In the PMF model, uncertainty is a function to evaluate the deviations in sampling and analysis procedure (Paatero, 2007). The uncertainty (U) can be calculated based on Eq. (3) (Polissar et al., 1998).

$$U = \begin{cases} \sqrt{(EF \times \text{concentration})^2 + (MDL)^2} & (\text{conc.} > \text{MDL}) \\ \frac{5}{6} MDL & (\text{conc} \leq \text{MDL}) \end{cases} \quad (3)$$

where  $EF$  signifies the error fraction that equals 100 times of the percentage uncertainty.

Table S1. Detailed information on the calibration curve for 57VOCs and their MIR

| NO. | Species                 | R <sup>2</sup> | MDL<br>(pptv) | RSD | MIR  |          | NO. | Species                 | R <sup>2</sup> | MDL<br>(pptv) | RSD | MIR   |
|-----|-------------------------|----------------|---------------|-----|------|----------|-----|-------------------------|----------------|---------------|-----|-------|
| 1   | Ethane                  | 0.9998         | 6.8           | 5%  | 0.28 | Alkene   | 29  | Ethylene                | 0.9997         | 12.5          | 10% | 9     |
| 2   | Propane                 | 0.9998         | 2.8           | 2%  | 0.49 |          | 30  | Propylene               | 0.9998         | 6.2           | 5%  | 11.66 |
| 3   | Isobutane               | 0.9998         | 3.2           | 3%  | 1.23 |          | 31  | Trans-2-butene          | 1              | 3.6           | 6%  | 15.16 |
| 4   | n-Butane                | 0.9998         | 6.7           | 5%  | 1.15 |          | 32  | 1-Butene                | 0.9995         | 7.8           | 6%  | 9.73  |
| 5   | Cyclopentane            | 0.9971         | 8.5           | 7%  | 0.09 |          | 33  | Cis-2-butene            | 0.9997         | 6.8           | 6%  | 14.24 |
| 6   | Isopentane              | 0.9999         | 5.5           | 4%  | 0.93 |          | 34  | 1,3-butadiene           | 0.9874         | 13.5          | 8%  |       |
| 7   | n-Pentane               | 0.9999         | 6.6           | 5%  | 0.88 |          | 35  | 1-Pentene               | 0.9764         | 6.3           | 5%  | 7.21  |
| 8   | 2,2-Dimethyl-butane     | 0.9963         | 5.4           | 4%  | 1.17 |          | 36  | Trans-2-pentene         | 0.9964         | 10.1          | 7%  | 10.56 |
| 9   | 2,3-Dimethylbutane      | 0.9966         | 7.6           | 6%  | 0.97 |          | 37  | Isoprene                | 0.9966         | 7.7           | 6%  | 10.61 |
| 10  | 2-Methylpentane         | 0.9958         | 8             | 6%  | 1.5  |          | 38  | Cis-2-pentene           | 0.9965         | 8.6           | 7%  | 10.38 |
| 11  | 3-Methylpentane         | 0.9967         | 5.4           | 4%  | 1.8  | Alkyne   | 39  | 1-Hexene                | 0.9961         | 11.4          | 9%  | 4.4   |
| 12  | n-Hexane                | 0.9967         | 7.3           | 6%  | 1.24 |          | 40  | Acetylene               | 0.9996         | 7.1           | 5%  | 0.95  |
| 13  | 2,4-Dimethylpentane     | 0.9972         | 9.6           | 7%  | 1.55 |          | 41  | Benzene                 | 0.9975         | 6.5           | 5%  | 0.72  |
| 14  | Methyl-cyclopentane     | 0.9974         | 5.8           | 5%  | 2.19 |          | 42  | Toluene                 | 0.9963         | 4.3           | 4%  | 4     |
| 15  | 2-Methyl-hexane         | 0.9968         | 8.6           | 7%  | 1.19 |          | 43  | Ethyl-benzene           | 0.9955         | 4.8           | 4%  | 3.04  |
| 16  | Cyclohexane             | 0.9958         | 7.7           | 6%  | 1.25 |          | 44  | m,p-Xylene <sup>a</sup> | 0.9969         | 12.5          | 5%  | 7.8   |
| 17  | 2,3-Dimethyl-pentane    | 0.9969         | 6.2           | 5%  | 1.34 |          | 45  | o-Xylene                | 0.9954         | 5.2           | 4%  | 7.64  |
| 18  | 3-Methyl-hexane         | 0.9946         | 8.8           | 7%  | 1.61 |          | 46  | Styrene                 | 0.9961         | 10.6          | 8%  | 1.73  |
| 19  | 2,2,4-Trimethyl-pentane | 0.9975         | 7.1           | 6%  | 1.26 |          | 47  | Isopropylbenzene        | 0.9947         | 4.3           | 4%  | 2.52  |
| 20  | n-Heptane               | 0.9974         | 9             | 7%  | 1.07 | Aromatic | 48  | n-Propylbenzene         | 0.9929         | 1.6           | 1%  | 2.03  |
| 21  | Methyl-cyclohexane      | 0.9972         | 5.8           | 5%  | 1.7  |          | 49  | m-Ethyltoluene          | 0.991          | 7.3           | 6%  | 7.39  |
| 22  | 2,3,4-Trimethyl-pentane | 0.9976         | 5.7           | 5%  | 1.03 |          | 50  | p-Ethyltoluene          | 0.9994         | 8.4           | 7%  | 4.44  |
| 23  | 2-Methyl-heptane        | 0.9971         | 7             | 6%  | 1.07 |          | 51  | 1,3,5-Trimethyl-benzene | 0.9994         | 6.1           | 5%  | 11.76 |
| 24  | 3-Methyl-heptane        | 0.9974         | 6.7           | 5%  | 1.24 |          | 52  | o-Ethyltoluene          | 0.9995         | 4.3           | 4%  | 5.59  |
| 25  | n-Octane                | 0.9973         | 7.6           | 6%  | 0.9  |          | 53  | 1,2,4-Trimethylbenzene  | 0.9983         | 9.7           | 8%  | 8.87  |
| 26  | n-Nonane                | 0.9963         | 3.4           | 3%  | 0.78 |          | 54  | 1,2,3-Trimethylbenzene  | 0.9927         | 9.7           | 8%  | 11.97 |
| 27  | n-Decane                | 0.9935         | 7.8           | 6%  | 0.68 |          | 55  | m-Diethylbenzene        | 0.9967         | 5.2           | 4%  | 7.1   |
| 28  | n-Undecane              | 0.9919         | 7.5           | 6%  | 0.61 |          | 56  | p-Diethylbenzene        | 0.995          | 4.2           | 3%  | 4.43  |

<sup>a</sup> *m*-Xylene and *p*-Xylene are co-eluted in the chromatographic separation.

TableS2. The correlation coefficient ( $R^2$ ) between observed and predicted values for each compound at the four sites

|                         | JK   | MEM  | YH   | GS   |
|-------------------------|------|------|------|------|
| propane                 | 0.83 | 0.91 | 0.84 | 0.60 |
| iso-butane              | 0.77 | 0.92 | 0.93 | 0.79 |
| isopentane              | 0.71 | 0.42 | 0.53 | 0.84 |
| n-pentane               | 0.91 | 0.74 | 0.65 | 0.89 |
| 3-methylpentane         | 0.92 | 0.69 | 0.93 | 0.88 |
| methylcyclopentane      | 0.96 | 0.83 | 0.89 | 0.91 |
| 2-methylhaxane          | 0.98 | 0.98 | 0.99 | 0.99 |
| haxane                  | 0.99 | 0.93 | 0.95 | 0.99 |
| 2,3-dimethylpentane     | 0.97 | 1.00 | 0.84 | 0.99 |
| 3-methylhaxane          | 0.97 | 0.98 | 0.99 | 0.99 |
| 2,2,4-trimethylpentane  | 0.89 | 0.94 | 0.72 | 0.80 |
| heptane                 | 0.98 | 0.88 | 0.82 | 0.79 |
| methylcyclohexane       | 0.80 | 0.99 | 0.52 | 0.85 |
| n-nonane                | 0.96 | 0.97 | 0.66 | 0.47 |
| n-Nonane                | 0.83 | 0.92 | 0.20 | 0.75 |
| n-Decane                | 0.95 | 0.95 | 0.41 | 0.91 |
| n-Undecane              | 0.93 | 0.95 | 0.78 | 0.86 |
| Trans-2-butene          | 0.98 | 0.97 | 0.97 | 0.60 |
| 1-Butene                | 0.94 | 0.97 | 0.94 | 0.68 |
| Isoprene                | 0.99 | 0.20 | 0.96 | 0.91 |
| Acetylene               | 0.60 | 0.88 | 0.85 | 0.80 |
| Benzene                 | 0.97 | 0.86 | 0.41 | 0.94 |
| Toluene                 | 0.93 | 0.86 | 0.97 | 0.82 |
| Ethyl-benzene           | 0.91 | 0.94 | 0.99 | 0.98 |
| m,p-Xylene <sup>a</sup> | 0.92 | 0.99 | 0.98 | 0.86 |
| o-Xylene                | 0.97 | 0.99 | 0.97 | 0.87 |
| Styrene                 | 0.75 | 0.81 | 0.88 | 0.84 |
| 1,2,4-Trimethylbenzene  | 0.84 | 0.88 | 0.97 | 0.92 |
| NO <sub>2</sub>         | 0.88 | 0.69 | 0.79 | 0.67 |

Table S3 Error estimation summary results, i.e. BS mapping for the four sites  
(a) JK

|               | LPG/CNG+ga-<br>soline evaporation | solvent<br>use | diesel<br>vapor | coal<br>combustion | petrochemical<br>source | vehicle<br>exhaust | biogenic | traffic<br>related | Unmapped |
|---------------|-----------------------------------|----------------|-----------------|--------------------|-------------------------|--------------------|----------|--------------------|----------|
| Boot Factor 1 | 3                                 | 0              | 3               | 0                  | 1                       | 1                  | 0        | 90                 | 2        |
| Boot Factor 2 | 3                                 | 0              | 20              | 0                  | 0                       | 58                 | 9        | 7                  | 3        |
| Boot Factor 3 | 0                                 | 100            | 0               | 0                  | 0                       | 0                  | 0        | 0                  | 0        |
| Boot Factor 4 | 2                                 | 0              | 5               | 0                  | 2                       | 0                  | 80       | 6                  | 5        |
| Boot Factor 5 | 92                                | 0              | 4               | 0                  | 1                       | 1                  | 2        | 0                  | 0        |
| Boot Factor 6 | 0                                 | 0              | 100             | 0                  | 0                       | 0                  | 0        | 0                  | 0        |
| Boot Factor 7 | 0                                 | 0              | 1               | 1                  | 98                      | 0                  | 0        | 0                  | 0        |
| Boot Factor 8 | 1                                 | 0              | 0               | 98                 | 0                       | 0                  | 1        | 0                  | 0        |

(b) MEM

|               | LPG/CNG+gasoline<br>evaporation | solvent<br>use | diesel<br>vapor | coal<br>combustion | petrochemical<br>source | vehicle<br>exhaust | biogenic | Unmapped |
|---------------|---------------------------------|----------------|-----------------|--------------------|-------------------------|--------------------|----------|----------|
| Boot Factor 1 | 94                              | 2              | 0               | 1                  | 0                       | 2                  | 0        | 1        |
| Boot Factor 2 | 0                               | 5              | 0               | 91                 | 0                       | 3                  | 0        | 1        |
| Boot Factor 3 | 0                               | 100            | 0               | 0                  | 0                       | 0                  | 0        | 0        |
| Boot Factor 4 | 0                               | 0              | 100             | 0                  | 0                       | 0                  | 0        | 0        |
| Boot Factor 5 | 0                               | 1              | 0               | 0                  | 0                       | 99                 | 0        | 0        |
| Boot Factor 6 | 0                               | 0              | 0               | 0                  | 100                     | 0                  | 0        | 0        |
| Boot Factor 7 | 2                               | 0              | 3               | 1                  | 0                       | 5                  | 87       | 2        |

(c) YH

|               | LPG/CNG+gasoline<br>evaporation | solvent<br>use | diesel<br>vapor | coal<br>combustion | petrochemical<br>source | vehicle<br>exhaust | biogenic | Unmapped |
|---------------|---------------------------------|----------------|-----------------|--------------------|-------------------------|--------------------|----------|----------|
| Boot Factor 1 | 0                               | 0              | 0               | 0                  | 0                       | 0                  | 100      | 0        |
| Boot Factor 2 | 0                               | 0              | 0               | 0                  | 0                       | 100                | 0        | 0        |
| Boot Factor 3 | 1                               | 0              | 1               | 93                 | 2                       | 2                  | 0        | 1        |
| Boot Factor 4 | 1                               | 0              | 0               | 0                  | 99                      | 0                  | 0        | 0        |
| Boot Factor 5 | 11                              | 70             | 1               | 1                  | 9                       | 5                  | 0        | 3        |
| Boot Factor 6 | 1                               | 0              | 99              | 0                  | 0                       | 0                  | 0        | 0        |
| Boot Factor 7 | 100                             | 0              | 0               | 0                  | 0                       | 0                  | 0        | 0        |

(d) GS

|               | LPG/CNG+gasoline<br>evaporation | solvent<br>use | diesel<br>vapor | coal<br>combustion | petrochemical<br>source | vehicle<br>exhaust | biogenic |
|---------------|---------------------------------|----------------|-----------------|--------------------|-------------------------|--------------------|----------|
| Boot Factor 1 | 0                               | 0              | 0               | 1                  | 0                       | 99                 | 0        |
| Boot Factor 2 | 0                               | 100            | 0               | 0                  | 0                       | 0                  | 0        |
| Boot Factor 3 | 96                              | 0              | 3               | 1                  | 0                       | 0                  | 0        |
| Boot Factor 4 | 0                               | 0              | 100             | 0                  | 0                       | 0                  | 0        |
| Boot Factor 5 | 3                               | 0              | 3               | 2                  | 0                       | 1                  | 90       |
| Boot Factor 6 | 3                               | 0              | 11              | 84                 | 0                       | 1                  | 0        |
| Boot Factor 7 | 0                               | 0              | 1               | 0                  | 96                      | 1                  | 0        |

TableS4. The ratio of Q/Q(exp) at factor size ranged from 3-9 at the four sites

| Number of factors | JK   | MEM  | YH   | GS   |
|-------------------|------|------|------|------|
| 3                 | 2.78 | 1.76 | 2.29 | 2.68 |
| 4                 | 2.46 | 1.36 | 1.95 | 2.14 |
| 5                 | 2.15 | 1.07 | 1.62 | 1.87 |
| 6                 | 1.81 | 0.91 | 1.40 | 1.58 |
| 7                 | 1.65 | 0.77 | 1.30 | 1.41 |
| 8                 | 1.54 | 0.68 | 1.24 | 1.29 |
| 9                 | 1.46 | 0.62 | 1.18 | 1.18 |

Table S5. The average mixing ratios of SO<sub>2</sub>, NO<sub>x</sub>, CO and O<sub>3</sub> during May to September

|           | SO <sub>2</sub> (ppb) | NO <sub>x</sub> (ppb) | CO(ppm) | O <sub>3</sub> (ppb) |
|-----------|-----------------------|-----------------------|---------|----------------------|
| May       | 9.55                  | 35.76                 | 0.70    | 86.73                |
| June      | 5.49                  | 31.76                 | 0.71    | 99.32                |
| July      | 2.52                  | 20.62                 | 0.69    | 76.27                |
| August    | 2.98                  | 25.48                 | 0.89    | 76.92                |
| September | 5.72                  | 52.60                 | 0.96    | 61.31                |

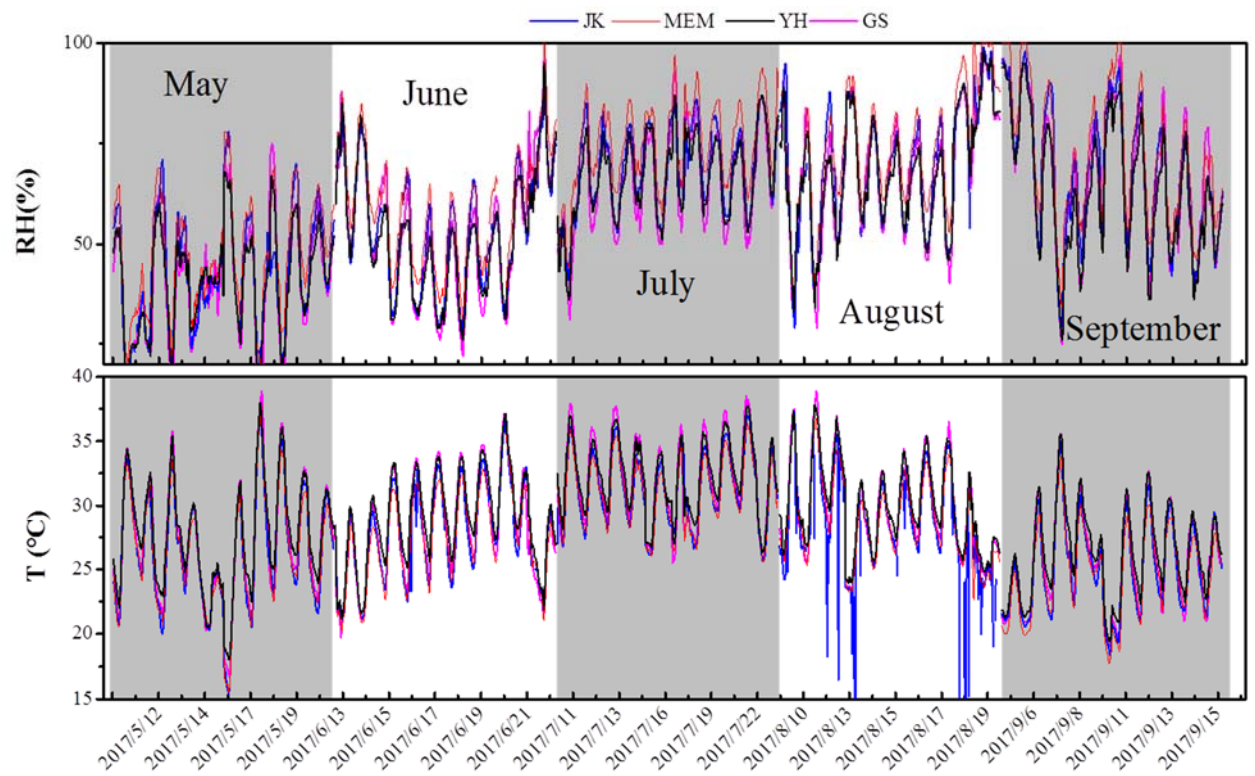

Fig. S1 the temperature and Relative humidity at each site during sampling period

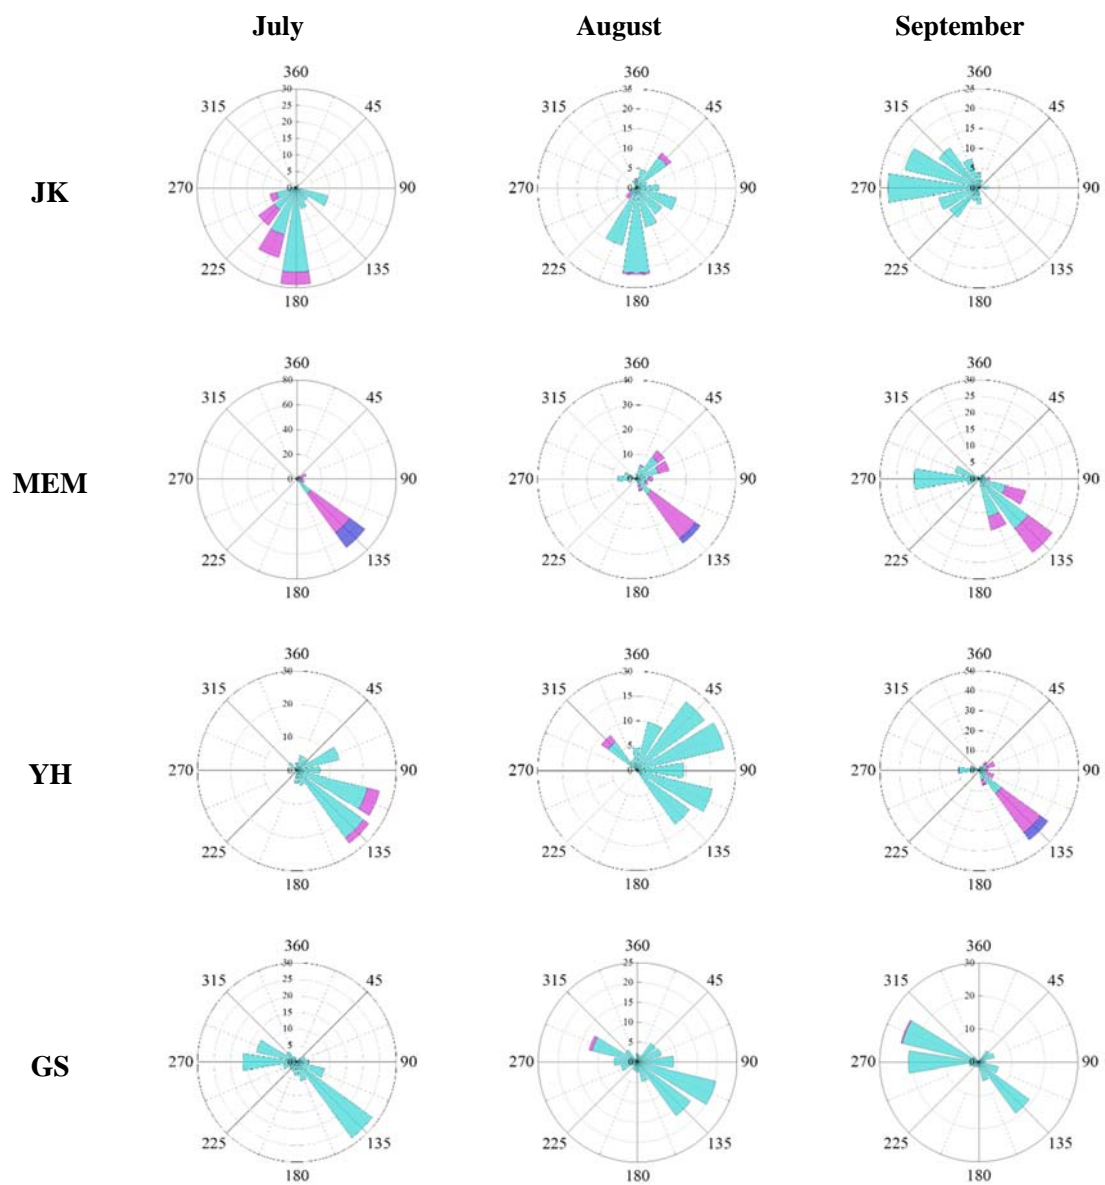

Fig. S2 The wind distribution at each site in July, August and September



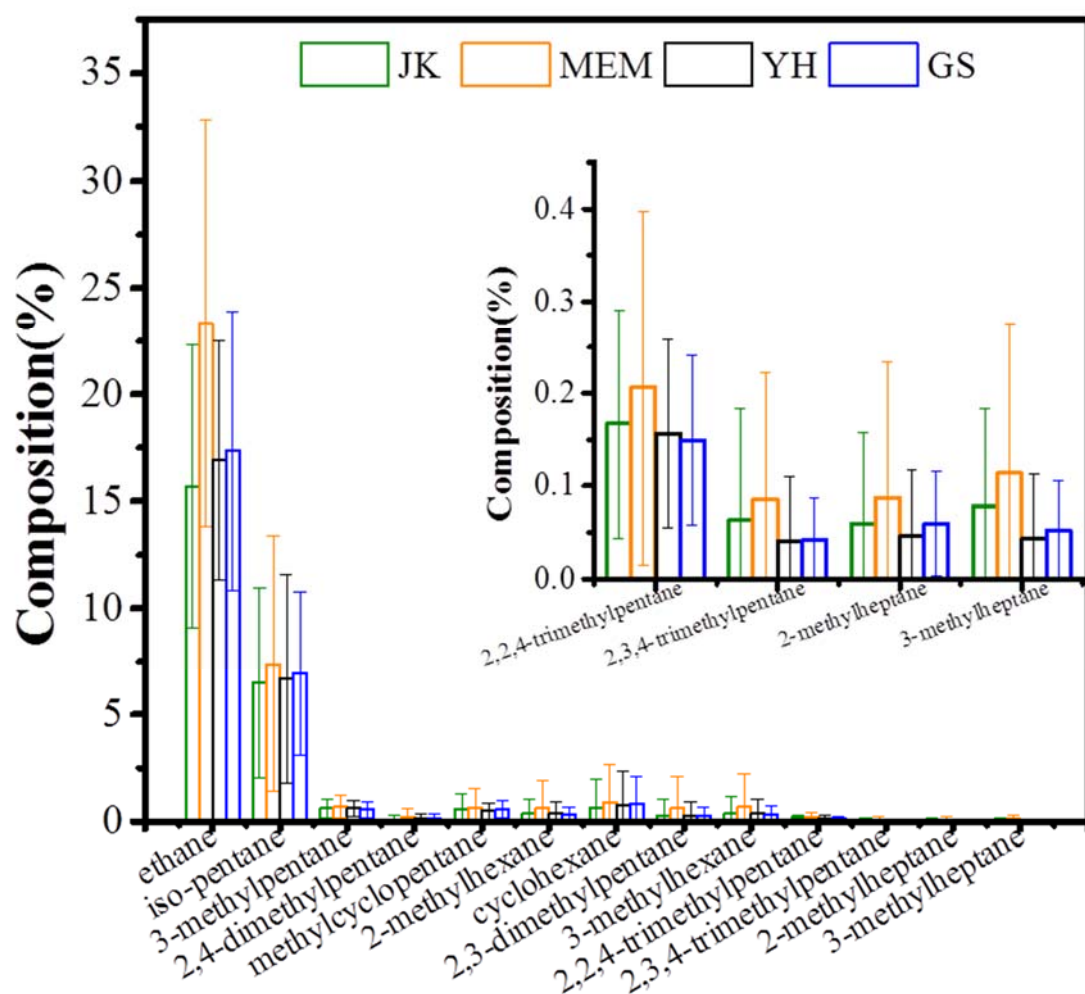

Fig. S3 Compositions of ethane, iso-pentane and C7-C8 alkanes at JK, MEM, YH and GS

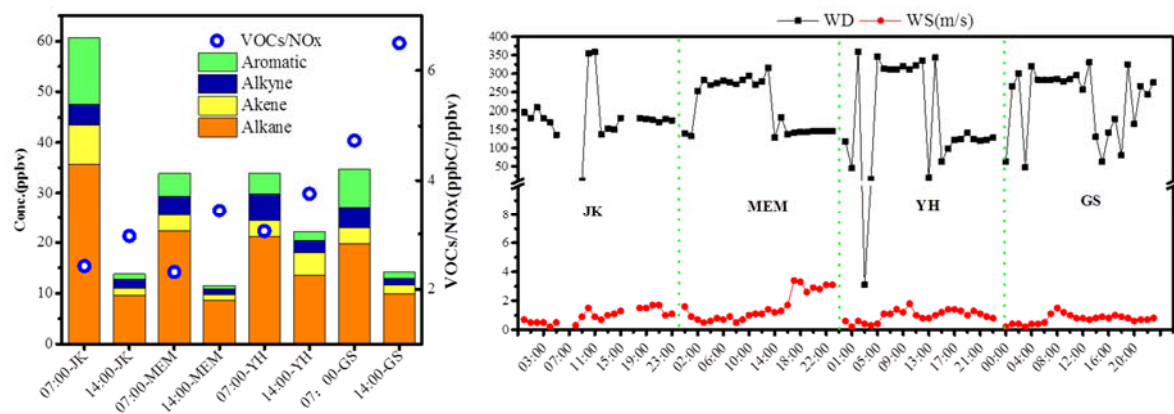

Fig.S4 Temporal variation of compositions, VOCs/NOx, wind direction and wind speed on 10<sup>th</sup> of August 2017

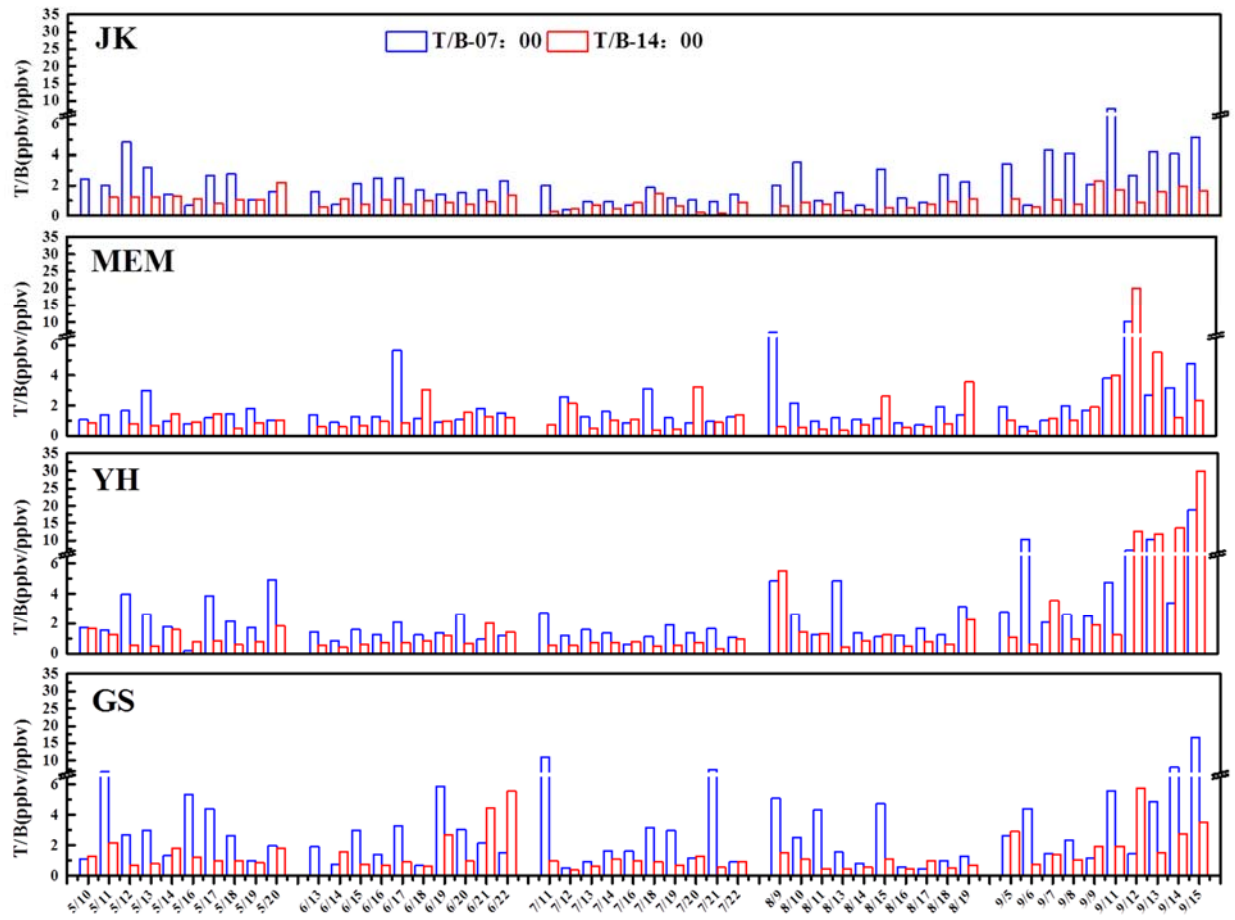

Fig.S5 Time series of T/B ratios for each site during May-September, 2017

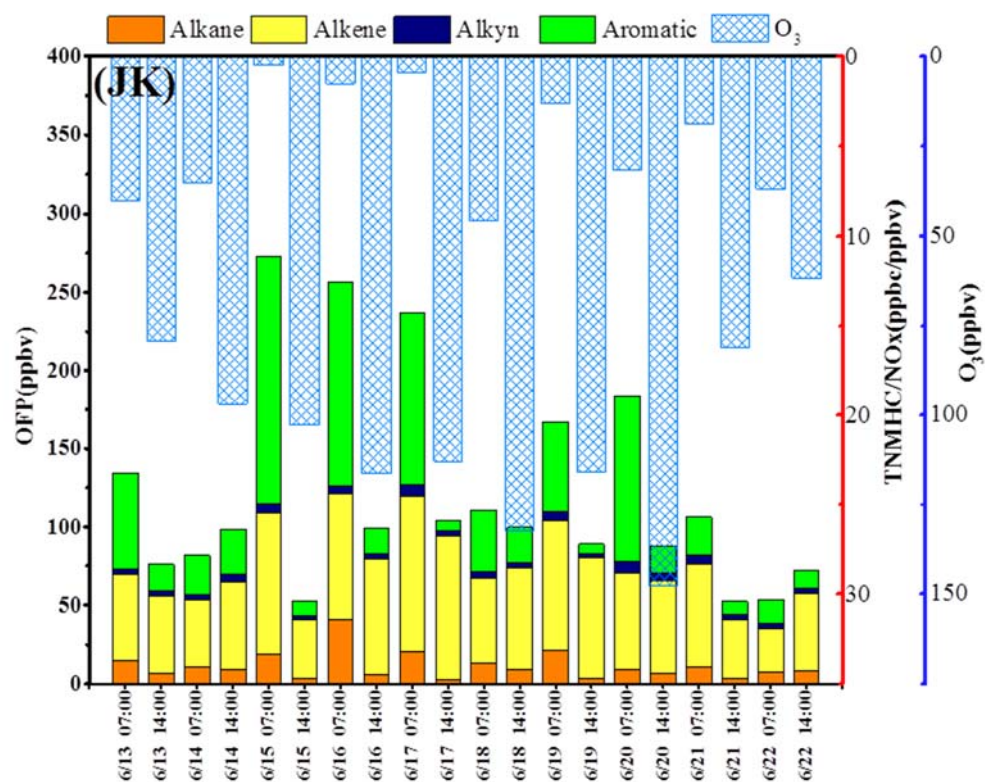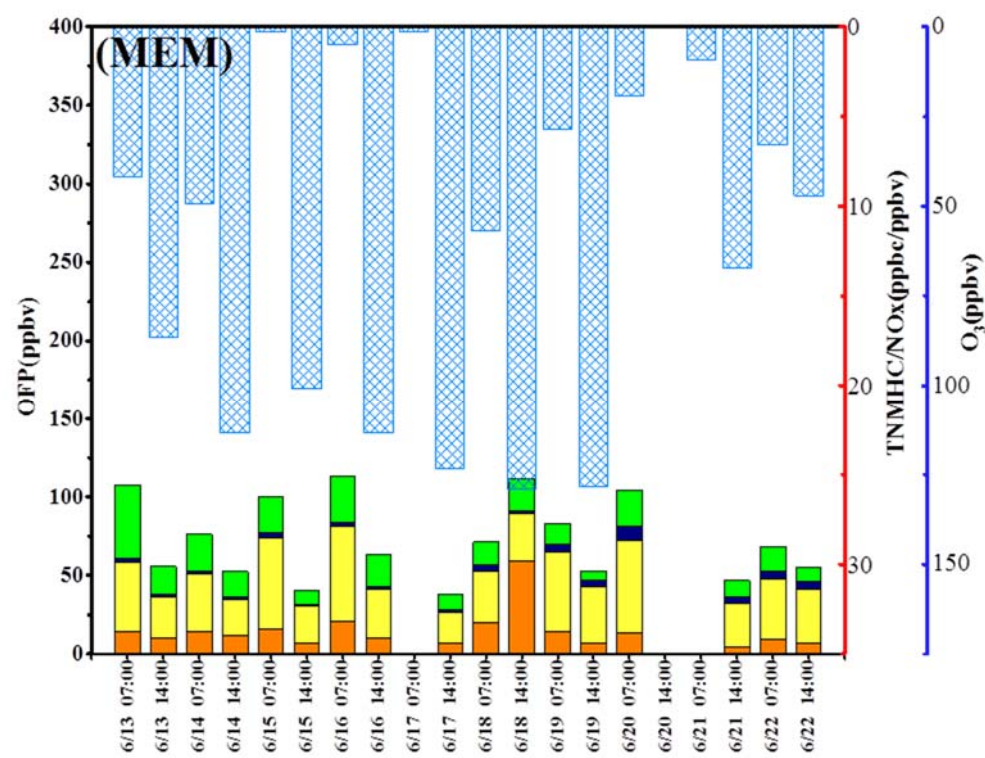

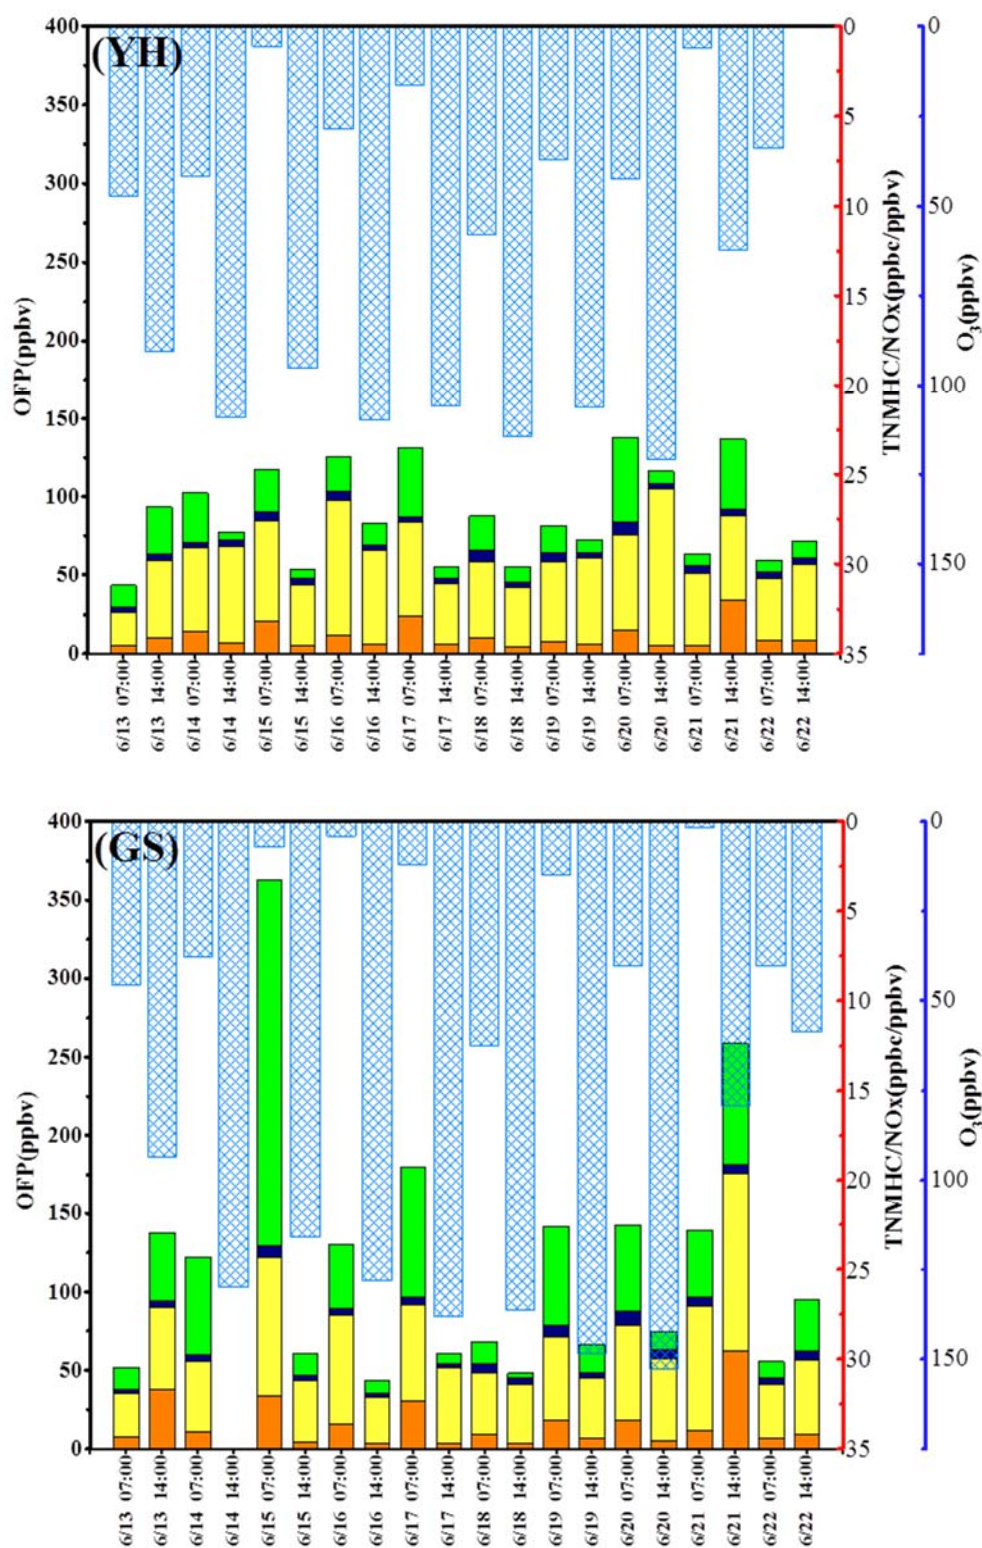

Fig.S6 Spatio-temporal variations in meteorological factors, OFP of each organic group, and mixing ratios of O<sub>3</sub> in June.



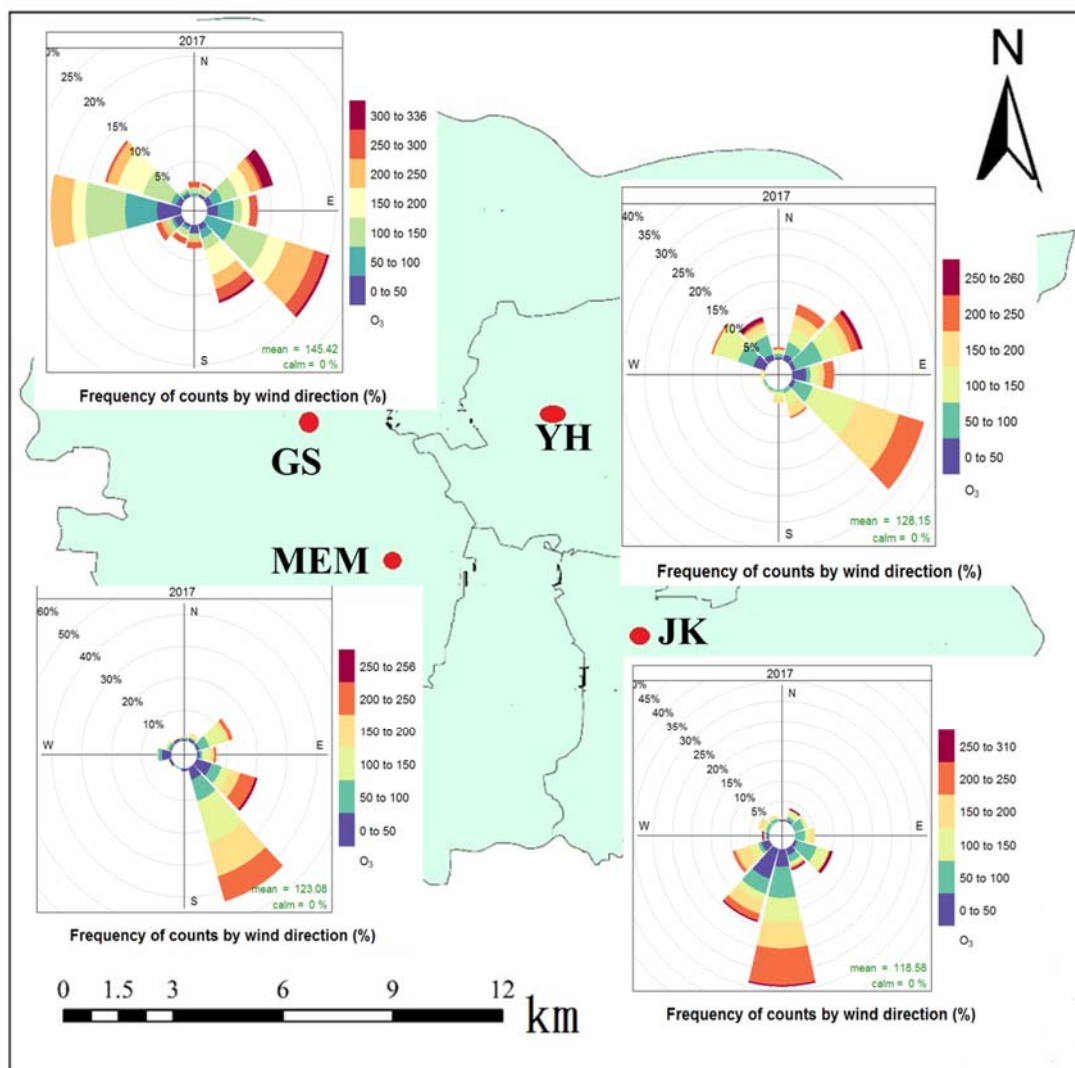

Fig.S7 Relationship among O<sub>3</sub>( μ g m<sup>-3</sup>), wind direction and wind speed ( m s<sup>-1</sup> ) during sampling period in June, 2017
